# Supplementary material for: Elliptic percolation model for predicting the electrical conductivity of graphene–polymer composites
Source: Royal Society of Chemistry journal article supplement (doi:10.1039/d0sm01950j), 2020-12-22
Supplement: d0sm01950j1.zip [file d0sm01950j1.zip]

## Sheet: Raw Data
																r=0.025	r=0.05	r=0.1	r=0.2	r=0.4	r=0.5
				Pper						Ne						Phi						Nb						Nper						Aper						Tau						Nb/Ne
		N	phi	r=0.025	r=0.05	r=0.1	r=0.2	r=0.4	r=0.5	r=0.025	r=0.05	r=0.1	r=0.2	r=0.4	r=0.5	0.025	0.05	0.1	0.2	0.4	0.5	r=0.025	r=0.05	r=0.1	r=0.2	r=0.4	r=0.5	r=0.025	r=0.05	r=0.1	r=0.2	r=0.4	r=0.5	r=0.025	r=0.05	r=0.1	r=0.2	r=0.4	r=0.5	r=0.025	r=0.05	r=0.1	r=0.2	r=0.4	r=0.5	r=0.025	r=0.05	r=0.1	r=0.2
		10	0.01	0	0	0	0	0	0	1.3	0.4	0.85	1.35	0.8	0.7	0.0202133	0.00626349	0.013263	0.0209825	0.0124877	0.0109353	0.2	0	0	0	0	0	0	0	0	0	0	0	0	0	0	0	0	0	0	0	0	0	0	0	0.153846	0	0	0
			0.02	0	0	0	0	0	0	2.25	1.9	1.9	1.9	2.05	2.65	0.0347256	0.0294042	0.0294042	0.0294042	0.0316884	0.0407716	0.45	0.25	0	0.05	0.05	0.05	0	0	0	0	0	0	0	0	0	0	0	0	0	0	0	0	0	0	0.2	0.131579	0	0.0263158
			0.03	0	0	0	0	0	0	2.25	2.6	3.05	3.25	2.95	3.05	0.0347256	0.040018	0.0467797	0.0497697	0.0452813	0.0467797	0.25	0.2	0.1	0	0.1	0	0	0	0	0	0	0	0	0	0	0	0	0	0	0	0	0	0	0	0.111111	0.0769231	0.0327869	0
			0.04	0	0	0	0	0	0	4.35	4.85	3.95	4.25	3.6	4.85	0.0660474	0.073354	0.0601608	0.0645792	0.0549795	0.073354	1.2	0.7	0.25	0.1	0.05	0.2	0	0	0	0	0	0	0	0	0	0	0	0	0	0	0	0	0	0	0.275862	0.14433	0.0632911	0.0235294
			0.05	0.1	0	0	0	0	0	5.25	5.05	4.65	4.45	4.3	4.8	0.079158	0.0762605	0.0704382	0.0675133	0.0653136	0.0726259	1.6	0.8	0.1	0.1	0.1	0	4	0	0	0	0	0	0.0310344	0	0	0	0	0	1.15265	0	0	0	0	0	0.304762	0.158416	0.0215054	0.0224719
			0.06	0	0	0	0	0	0	5.65	6.9	6.55	5.25	6.35	5.5	0.0849257	0.102718	0.0977712	0.079158	0.0949323	0.082767	1.55	0.8	0.3	0.1	0.15	0	0	0	0	0	0	0	0	0	0	0	0	0	0	0	0	0	0	0	0.274336	0.115942	0.0458015	0.0190476
			0.07	0.05	0	0	0	0	0	6.95	8	6.55	7.7	7.7	7.15	0.103422	0.118089	0.0977712	0.113923	0.113923	0.106235	1.5	1.1	0.15	0.6	0.4	0.15	4	0	0	0	0	0	0.0307044	0	0	0	0	0	1.02869	0	0	0	0	0	0.215827	0.1375	0.0229008	0.0779221
			0.08	0.1	0.05	0	0	0	0	7.5	8.05	7.35	7.3	8.15	8	0.111135	0.118781	0.109038	0.108338	0.120164	0.118089	2.65	1.35	0.8	0.2	0.1	0.15	5	5	0	0	0	0	0.0385305	0.03816	0	0	0	0	1.06888	1.12604	0	0	0	0	0.353333	0.167702	0.108844	0.0273973
			0.09	0.1	0	0	0	0	0	8.05	8.75	9.2	9.2	8.1	9.1	0.118781	0.128417	0.134557	0.134557	0.119473	0.133196	2.65	1.6	0.45	0.4	0.2	0.3	3.5	0	0	0	0	0	0.0266733	0	0	0	0	0	1.03036	0	0	0	0	0	0.329193	0.182857	0.048913	0.0434783
			0.1	0.1	0	0	0	0	0	9.65	10	10.1	9.3	10.05	9.95	0.140652	0.145364	0.146705	0.135915	0.146035	0.144693	3.75	1.55	0.6	0.25	0.5	0.35	3.5	0	0	0	0	0	0.0272114	0	0	0	0	0	1.10025	0	0	0	0	0	0.388601	0.155	0.0594059	0.0268817
			0.11	0.4	0.05	0	0	0	0	11.95	11.05	10.75	10.8	11.55	12.1	0.171145	0.159344	0.155373	0.156036	0.165921	0.173096	6.5	3.25	1	1	0.4	0.25	3.9375	7	0	0	0	0	0.0304317	0.053029	0	0	0	0	1.13784	1.61328	0	0	0	0	0.543933	0.294118	0.0930233	0.0925926
			0.12	0.25	0	0	0	0	0	11.3	10.55	11.2	12.4	11.85	12.2	0.162639	0.152716	0.161323	0.176983	0.169842	0.174394	6.15	1.7	1.25	0.65	0.6	0.35	5.2	0	0	0	0	0	0.0398952	0	0	0	0	0	1.22246	0	0	0	0	0	0.544248	0.161137	0.111607	0.0524194
			0.13	0.45	0	0	0	0	0	12.7	13.05	13.85	12.5	13.7	13	0.180853	0.185344	0.195517	0.178275	0.193619	0.184704	7.85	3.9	1	0.75	0.6	0.6	3.94444	0	0	0	0	0	0.0302222	0	0	0	0	0	1.09559	0	0	0	0	0	0.61811	0.298851	0.0722022	0.06
			0.14	0.55	0.05	0	0	0	0	13.05	14.1	14.15	13.2	13.05	14.45	0.185344	0.19867	0.199299	0.187261	0.185344	0.203063	9.9	3.95	2.65	0.85	0.5	0.75	4.22727	7	0	0	0	0	0.0325796	0.0531731	0	0	0	0	1.26222	1.25807	0	0	0	0	0.758621	0.280142	0.187279	0.0643939
			0.15	0.55	0	0	0	0	0	15.35	15.65	14.35	14.35	14.75	14.65	0.21425	0.217945	0.201811	0.201811	0.20681	0.205563	10.5	5.25	1.55	0.7	0.2	0.7	4	0	0	0	0	0	0.0307989	0	0	0	0	0	1.10974	0	0	0	0	0	0.684039	0.335463	0.108014	0.0487805
			0.16	0.65	0.2	0	0	0	0	16.75	16.35	16.1	17.3	15.25	15.8	0.231341	0.226497	0.223453	0.237954	0.213015	0.219785	11.8	6.15	2.75	0.95	0.45	1	3.57051	5.75	0	0	0	0	0.0276192	0.0436326	0	0	0	0	1.10028	1.26627	0	0	0	0	0.704478	0.376147	0.170807	0.0549133
			0.17	0.65	0.2	0	0	0	0	17.65	17.45	15.5	17.5	16.55	15.55	0.242132	0.239747	0.2161	0.240344	0.228923	0.216715	14.05	7.25	1.9	1.45	0.7	0.75	4.37179	6	0	0	0	0	0.0336621	0.0453627	0	0	0	0	1.21068	1.18051	0	0	0	0	0.796034	0.415473	0.122581	0.0828571
			0.18	0.75	0.25	0	0	0	0	18.85	19.8	17.6	18.2	21.05	17.85	0.256283	0.267299	0.241536	0.248651	0.281545	0.244509	17.2	8.25	3.15	1.5	1.25	1.1	4.04444	5.2	0	0	0	0	0.03117	0.0392551	0	0	0	0	1.13335	1.12994	0	0	0	0	0.912467	0.416667	0.178977	0.0824176
			0.19	0.65	0.25	0	0	0	0	19.15	19.75	17.95	18.25	17.65	18.5	0.25978	0.266723	0.245695	0.249241	0.242132	0.252183	15.7	11.05	2.2	1.75	0.9	0.7	4.15385	6	0	0	0	0	0.0320183	0.0449977	0	0	0	0	1.09273	1.1254	0	0	0	0	0.819843	0.559494	0.122563	0.0958904
			0.2	0.75	0.05	0	0	0	0	18.85	18.8	21.05	19.9	20.65	19.55	0.256283	0.255699	0.281545	0.268449	0.277017	0.264416	16.25	6.85	4.75	2.15	0.75	0.9	4.24444	6	0	0	0	0	0.0326779	0.0457427	0	0	0	0	1.16237	1.23875	0	0	0	0	0.862069	0.364362	0.225653	0.10804
			0.21	0.8	0.2	0	0	0	0	18.9	21.1	19.75	22.15	21.2	22.15	0.256867	0.282109	0.266723	0.293853	0.283236	0.293853	16.65	9.15	4.65	2.35	1.05	0.85	3.89062	5	0	0	0	0	0.0299795	0.0377586	0	0	0	0	1.12901	1.12355	0	0	0	0	0.880952	0.433649	0.235443	0.106095
			0.22	0.95	0.45	0	0	0	0	21.55	24.05	21.45	23.45	21.5	21.45	0.287166	0.314616	0.286045	0.308126	0.286606	0.286045	20	16.9	4.05	2.55	0.65	1.3	3.76316	5.94444	0	0	0	0	0.0289107	0.0451579	0	0	0	0	1.0938	1.22014	0	0	0	0	0.928074	0.702703	0.188811	0.108742
			0.23	0.95	0.15	0	0	0	0	22.7	22.05	22.6	21.95	21.55	22.95	0.299927	0.292743	0.298827	0.291631	0.287166	0.302671	20.75	8.55	5.4	1.85	1.1	1.7	3.83333	6.33333	0	0	0	0	0.0296425	0.0475516	0	0	0	0	1.13241	1.12164	0	0	0	0	0.914097	0.387755	0.238938	0.0842825
			0.24	0.8	0.45	0.05	0	0	0	24.4	23.45	23.5	21.9	23.55	23.55	0.318374	0.308126	0.308669	0.291074	0.309212	0.309212	21.45	15.4	5.7	1.7	1.35	1.2	4.34896	6.11111	6	0	0	0	0.0333379	0.0460507	0.0432299	0	0	0	1.11644	1.2154	1.00114	0	0	0	0.879098	0.656716	0.242553	0.0776256
			0.25	1	0.25	0	0	0	0	25.25	24.2	23	24.9	24.25	24.95	0.327415	0.316229	0.303218	0.323707	0.316766	0.324238	24.95	14.35	4.25	2.2	1.65	1.1	4.03417	4.9	0	0	0	0	0.0310719	0.0371978	0	0	0	0	1.09437	1.07339	0	0	0	0	0.988119	0.592975	0.184783	0.0883534
			0.26	0.95	0.45	0	0	0	0	25.45	26.2	24.7	25.9	24.45	24.8	0.329524	0.337377	0.321579	0.334247	0.318909	0.322643	24.8	15.35	6.1	3	1.95	0.75	3.97632	5.88889	0	0	0	0	0.030589	0.0447146	0	0	0	0	1.10666	1.1998	0	0	0	0	0.97446	0.585878	0.246964	0.11583
			0.27	1	0.6	0	0	0	0	27.3	26.6	24.75	26.7	26.7	27.15	0.348728	0.341527	0.322111	0.342561	0.342561	0.347191	26.8	18.6	5.15	2.25	2.65	1.25	4.00833	5.75	0	0	0	0	0.0308798	0.0437433	0	0	0	0	1.0853	1.14717	0	0	0	0	0.981685	0.699248	0.208081	0.0842697
			0.28	0.8	0.6	0	0	0	0	26.9	29.25	29.05	29.1	28.45	27.8	0.344623	0.368374	0.366387	0.366884	0.360387	0.353823	24.45	24	7.2	3.3	1.65	1.7	4.15104	5.95833	0	0	0	0	0.0318842	0.0450949	0	0	0	0	1.15301	1.16249	0	0	0	0	0.908922	0.820513	0.247849	0.113402
			0.29	1	0.7	0.05	0	0	0	29.3	29.95	29.5	28.45	30.7	28.25	0.36887	0.375281	0.37085	0.360387	0.382598	0.358374	29.05	23.6	7.5	3.8	4	2.15	3.98917	5.57143	7	0	0	0	0.0306418	0.0422967	0.05235	0	0	0	1.1059	1.18143	1.15965	0	0	0	0.991468	0.78798	0.254237	0.133568
			0.3	0.95	0.5	0	0	0	0	29.5	29.7	28.4	27.9	30.4	30.05	0.37085	0.372823	0.359884	0.354837	0.379681	0.376262	28.9	19.2	8.7	3.2	2.05	1.45	4.0114	5.71667	0	0	0	0	0.030861	0.0432974	0	0	0	0	1.08118	1.17413	0	0	0	0	0.979661	0.646465	0.306338	0.114695
			0.31	0.95	0.75	0	0	0	0	31.5	32.25	29.9	29.7	30.45	31.35	0.390308	0.397448	0.37479	0.372823	0.380168	0.388869	31	26.55	7.9	2.6	2.8	1.8	4.13947	5.4	0	0	0	0	0.0318583	0.041027	0	0	0	0	1.0915	1.16668	0	0	0	0	0.984127	0.823256	0.264214	0.0875421
			0.32	1	0.65	0	0	0	0	32.45	33.2	33.25	32.45	32.4	31.9	0.399338	0.406373	0.406839	0.399338	0.398866	0.394126	32	28.9	8	4.55	2.35	1.6	4.06583	5.11538	0	0	0	0	0.0312805	0.0386829	0	0	0	0	1.10012	1.10947	0	0	0	0	0.986133	0.870482	0.240602	0.140216
			0.33	1	0.9	0.05	0	0	0	29.95	33	35.4	33.25	32.3	32.75	0.375281	0.404505	0.426537	0.406839	0.397921	0.402162	29.65	30.55	14.7	5.25	3.1	2.05	4.08	6.16667	8	0	0	0	0.031404	0.046704	0.0599441	0	0	0	1.09293	1.24642	1.20699	0	0	0	0.989983	0.925758	0.415254	0.157895
			0.34	1	0.85	0.1	0	0	0	33.65	33.45	34.1	34.5	35.7	35.4	0.410554	0.4087	0.414706	0.418372	0.429233	0.426537	33.55	30.1	12.05	4.4	2.15	2.4	4.0125	6.11765	8.5	0	0	0	0.0309209	0.0459592	0.0614286	0	0	0	1.09212	1.14876	1.20141	0	0	0	0.997028	0.899851	0.353372	0.127536
			0.35	1	0.9	0.15	0	0	0	35.15	34.15	35	33.65	35.15	34.9	0.424281	0.415166	0.422923	0.410554	0.424281	0.422015	35	31.2	14.55	4	2.95	2.75	3.8975	5.57407	8.66667	0	0	0	0.0299576	0.0422414	0.0634812	0	0	0	1.09083	1.17846	1.25663	0	0	0	0.995733	0.913616	0.415714	0.118871
			0.36	1	0.85	0.25	0	0	0	36.6	37.6	36.45	36.95	36.45	36.15	0.437245	0.446016	0.435918	0.440331	0.435918	0.433253	36.45	34	15.8	6.7	3.6	3.6	4.05345	5.37255	9	0	0	0	0.0312396	0.0404248	0.0656345	0	0	0	1.08889	1.11583	1.46786	0	0	0	0.995902	0.904255	0.433471	0.181326
			0.37	1	0.7	0.4	0	0	0	36.5	35.25	37.3	37.8	37.4	35.25	0.436361	0.425184	0.443399	0.447754	0.444273	0.425184	36.45	29.5	20.55	8.5	3.55	2.45	3.9775	6.04762	7.9375	0	0	0	0.0305984	0.0456318	0.0585583	0	0	0	1.0685	1.20203	1.20659	0	0	0	0.99863	0.836879	0.550938	0.224868
			0.38	1	0.95	0.35	0	0	0	38.8	37.45	39.75	37.85	37.1	36.9	0.456361	0.444709	0.464413	0.448187	0.441648	0.439891	38.7	34.95	19.5	4.3	2.65	2.35	4.11988	5.80702	8.71429	0	0	0	0.031608	0.043875	0.064512	0	0	0	1.08705	1.1611	1.34794	0	0	0	0.997423	0.933244	0.490566	0.113606
			0.39	1	1	0.25	0	0	0	38.4	38.8	37.25	40	38.55	37.95	0.452934	0.456361	0.442962	0.466512	0.454221	0.449053	38.35	38.05	18.25	7.6	3.4	3.55	3.93571	5.51667	8.7	0	0	0	0.0303324	0.0413752	0.0640323	0	0	0	1.08137	1.12287	1.30342	0	0	0	0.998698	0.98067	0.489933	0.19
			0.4	1	0.8	0.3	0	0	0	39.65	40.05	42.1	39.35	39.7	38.65	0.463571	0.466931	0.483823	0.461037	0.463992	0.455078	39.6	34.55	22.45	8.3	3.6	3.35	3.98226	5.29167	7.83333	0	0	0	0.0306377	0.0399136	0.056947	0	0	0	1.08009	1.12225	1.2412	0	0	0	0.998739	0.862672	0.533254	0.210928
			0.41	1	1	0.25	0	0	0	41.05	41.2	41.15	41.5	40.2	42.05	0.475239	0.476474	0.476062	0.478935	0.468185	0.483417	41.05	40.5	18.5	4.6	3.6	4.85	4.03423	5.74167	8.7	0	0	0	0.0310433	0.0434358	0.0643339	0	0	0	1.09545	1.16016	1.28995	0	0	0	1	0.98301	0.449575	0.110843
			0.42	1	0.95	0.25	0	0	0	41.35	44.15	42.15	43.9	39.8	41.6	0.477706	0.50018	0.484228	0.498213	0.464833	0.479753	41.2	43	19.6	8.1	2.9	4.4	4.05298	5.91228	7.8	0	0	0	0.0311748	0.0445948	0.0575182	0	0	0	1.08201	1.1504	1.21056	0	0	0	0.996372	0.973952	0.465006	0.18451
			0.43	1	0.9	0.4	0.05	0	0	41.5	41.35	41.9	40.95	41.2	43.1	0.478935	0.477706	0.482199	0.474414	0.476474	0.491868	41.35	39	24.9	9.05	3.1	3.45	4.09036	5.75	8	9	0	0	0.0315107	0.0433675	0.0593547	0.0671648	0	0	1.08584	1.15907	1.23222	1.08603	0	0	0.996386	0.943168	0.594272	0.221001
			0.44	1	0.9	0.4	0	0	0	43.15	44.6	43.1	44.15	44.7	44.2	0.492267	0.5037	0.491868	0.50018	0.504479	0.500572	43.15	39.25	24.9	10.25	3.05	4.15	4.0006	5.61111	9.0625	0	0	0	0.0308441	0.0424285	0.0661339	0	0	0	1.08379	1.14111	1.3198	0	0	0	1	0.880045	0.577726	0.232163
			0.45	1	1	0.45	0.1	0	0	43.85	44.75	44.85	46.2	45.15	44.7	0.497819	0.504868	0.505645	0.516018	0.507969	0.504479	43.85	43.5	25.5	14.15	5.2	2.95	3.94774	5.63333	7.61111	10.5	0	0	0.0304219	0.0425563	0.0555936	0.074592	0	0	1.066	1.11947	1.15507	1.25259	0	0	1	0.972067	0.568562	0.306277
			0.46	1	0.95	0.4	0	0	0	44.4	49.05	44.15	47.4	48.4	46.6	0.502139	0.537207	0.50018	0.525056	0.532458	0.51905	44.4	45.95	23.95	6.15	5.25	3	4.01357	5.72456	7.625	0	0	0	0.0309171	0.0432034	0.0561225	0	0	0	1.06134	1.14832	1.20431	0	0	0	1	0.936799	0.542469	0.129747
			0.47	1	1	0.65	0	0	0	45.05	45.85	47.6	44.9	45.35	47.75	0.507196	0.51335	0.526545	0.506033	0.509513	0.52766	45	45.55	35.5	7.7	5.25	4.8	4.0925	6.11667	7.80769	0	0	0	0.0315162	0.0460845	0.0574977	0	0	0	1.07727	1.13835	1.22899	0	0	0	0.99889	0.993457	0.745798	0.171492
			0.48	1	1	0.45	0	0	0	48.4	51.5	48.3	50.1	49.6	46.9	0.532458	0.554679	0.531723	0.544777	0.541188	0.521311	48.4	51.05	30.4	9.9	5.5	5.1	4.08391	5.93333	7.25926	0	0	0	0.0313471	0.0448512	0.053429	0	0	0	1.07439	1.16118	1.12873	0	0	0	1	0.991262	0.6294	0.197605
			0.49	1	0.95	0.4	0.05	0	0	49.15	50.05	47.25	50.3	48.3	49.15	0.537933	0.54442	0.523935	0.546205	0.531723	0.537933	49	48.95	27.75	15.25	6.4	5.85	3.97829	5.37368	8.5	11	0	0	0.030622	0.0407566	0.0616274	0.074543	0	0	1.07207	1.11364	1.32751	1.31435	0	0	0.996948	0.978022	0.587302	0.303181
			0.5	1	0.95	0.35	0.05	0	0	50.4	49.2	50.15	50.5	49.8	50.2	0.546918	0.538296	0.545135	0.547629	0.542627	0.545492	50.4	45.85	28.45	13.5	5.35	5.6	4.14177	5.51754	8.35714	13	0	0	0.0317989	0.0417018	0.0616158	0.0907431	0	0	1.06448	1.1214	1.21183	1.41553	0	0	1	0.931911	0.567298	0.267327
			0.51	1	1	0.6	0.05	0	0	50.65	50.95	50.95	49.7	50.65	50.95	0.548693	0.550815	0.550815	0.541908	0.548693	0.550815	50.65	50.55	38.7	11.5	6.5	5.25	4.03375	5.55667	8.375	13	0	0	0.0310023	0.0421573	0.060794	0.0881994	0	0	1.0639	1.10714	1.18101	1.334	0	0	1	0.992149	0.759568	0.231388
			0.52	1	1	0.75	0.05	0	0	52.55	53.05	52.05	51.3	51.3	50.25	0.561964	0.565391	0.55851	0.553278	0.553278	0.545849	52.5	52.35	42.45	15.55	9.7	4.45	3.96643	5.21167	8.03333	11	0	0	0.0304614	0.0393691	0.0588641	0.0805571	0	0	1.06424	1.09048	1.20466	1.16502	0	0	0.999049	0.986805	0.815562	0.303119
			0.53	1	1	0.6	0.05	0	0	52.85	53.65	52.05	52.95	53.2	54.3	0.564023	0.569467	0.55851	0.564707	0.566413	0.573841	52.85	52.95	39.45	16.65	5.95	4.4	3.93714	5.52583	7.93056	13	0	0	0.0303071	0.0416179	0.0576802	0.0927267	0	0	1.05579	1.09338	1.17492	1.4342	0	0	1	0.986952	0.757925	0.314448
			0.54	1	1	0.65	0.05	0	0	53.25	52.15	52.35	52.8	53.8	54.35	0.566754	0.559203	0.560585	0.56368	0.570481	0.574175	53.2	51.75	40.75	12.9	7	6.05	3.97565	5.64917	7.61538	12	0	0	0.030576	0.0426518	0.0553867	0.0838677	0	0	1.07368	1.10916	1.15074	1.19166	0	0	0.999061	0.99233	0.778415	0.244318
			0.55	1	1	0.85	0.05	0	0	53.1	54.15	54.15	54.8	55.45	55.2	0.565732	0.572836	0.572836	0.577175	0.58147	0.579823	53.1	54	46.2	13.5	9.25	5.95	4.1079	5.4875	8.06863	12	0	0	0.031573	0.041494	0.0594413	0.0853549	0	0	1.06785	1.10549	1.18095	1.27569	0	0	1	0.99723	0.853186	0.24635
			0.56	1	0.95	0.75	0.1	0	0	54.9	56.4	54.65	53.95	55.25	55.8	0.577838	0.587669	0.576177	0.571491	0.580153	0.583765	54.85	54.5	43.6	19.5	8.05	5.1	4.02014	5.88333	8.27778	12	0	0	0.030961	0.0443674	0.0606366	0.0886398	0	0	1.05765	1.12963	1.2353	1.45914	0	0	0.999089	0.966312	0.797804	0.361446
			0.57	1	1	0.8	0.05	0	0	54.95	57.25	56.45	54.9	58.1	55	0.57817	0.593138	0.587993	0.577838	0.598534	0.578501	54.95	57.25	44.85	17.55	7.5	6.25	3.87837	5.79917	7.94792	12	0	0	0.0298399	0.0436865	0.0584052	0.0819471	0	0	1.04715	1.12005	1.19005	1.22214	0	0	1	1	0.794508	0.319672
			0.58	1	1	0.75	0.1	0	0	58.1	56.55	56.05	57.5	57.25	56.7	0.598534	0.58864	0.585396	0.594732	0.593138	0.589608	58.1	56.15	42.25	20.7	7.45	6.8	4.16014	5.58167	8.25556	11.5	0	0	0.0320002	0.0419909	0.060562	0.0816715	0	0	1.06554	1.10484	1.23394	1.28867	0	0	1	0.992927	0.753791	0.36
			0.59	1	1	0.8	0.2	0	0	59.25	58	58.7	57.8	61.15	58.35	0.605721	0.597903	0.6023	0.596638	0.617315	0.600108	59.25	57.5	47.1	20.9	8.7	9.1	3.91327	5.66333	8.89583	12	0	0	0.0301104	0.0427579	0.0647963	0.0856762	0	0	1.06559	1.12077	1.2778	1.33041	0	0	1	0.991379	0.802385	0.361592
			0.6	1	1	0.95	0.1	0	0	59.15	58.85	59.5	59.4	57.6	59.5	0.605101	0.603236	0.607266	0.606649	0.595369	0.607266	59.15	58.45	52.9	20.1	7.2	7.6	4.09909	5.52917	7.82456	12.5	0	0	0.0315213	0.0414939	0.0574034	0.0876505	0	0	1.06187	1.11285	1.1515	1.21133	0	0	1	0.993203	0.889076	0.338384
			0.61	1	1	0.8	0	0	0	61.2	62.4	61.15	62.7	60.4	60.05	0.617615	0.624755	0.617315	0.626519	0.61278	0.610645	61.2	61.85	53	25.35	7.7	10.05	3.94255	5.19917	7.90625	0	0	0	0.0303719	0.0393843	0.0572863	0	0	0	1.04726	1.10603	1.15085	0	0	0	1	0.991186	0.866721	0.404306
			0.62	1	0.95	0.8	0.1	0	0	59.6	61.8	61.05	61.05	62.95	62.35	0.607883	0.621202	0.616713	0.616713	0.627983	0.62446	59.6	61.55	51.3	22.1	11.95	9.25	4.12321	5.81491	7.90625	12	0	0	0.0317008	0.043839	0.057661	0.085267	0	0	1.06576	1.10424	1.19827	1.35521	0	0	1	0.995955	0.840295	0.361998
			0.63	1	1	0.8	0.25	0	0.05	62.35	63.45	63.1	63.05	61.6	64.05	0.62446	0.630894	0.628859	0.628567	0.62001	0.634356	62.35	63.25	54.75	25.95	11	11.75	3.95738	5.3925	7.8125	10.6	0	12	0.0304254	0.0405336	0.0569525	0.073602	0	0.088024	1.05996	1.09009	1.1698	1.16826	0	1.20119	1	0.996848	0.86767	0.411578
			0.64	1	1	0.9	0.25	0	0	64.25	64.8	63.5	63.1	63.4	64.9	0.635503	0.638638	0.631183	0.628859	0.630604	0.639206	64.25	64.7	57.7	29.9	11.25	9	4.11221	5.89619	8.27778	11	0	0	0.0315559	0.0443537	0.0606817	0.0784486	0	0	1.06618	1.12871	1.19422	1.3203	0	0	1	0.998457	0.908661	0.473851
			0.65	1	1	0.85	0.3	0	0	65.7	64.7	66.2	67.35	62.7	64.1	0.643711	0.63807	0.646498	0.652827	0.626519	0.634643	65.7	64.25	58.7	32	10.5	8.35	4.07621	5.55089	7.81863	11.5	0	0	0.0313545	0.0417815	0.0571558	0.0800347	0	0	1.06169	1.09232	1.16825	1.29453	0	0	1	0.993045	0.886707	0.47513
			0.66	1	1	0.9	0.1	0.05	0	67.55	65.9	64.65	65.95	64.9	65.15	0.653916	0.644829	0.637786	0.645107	0.639206	0.64062	67.55	65.7	57.5	21	11.95	7.4	4.0326	5.60738	7.65741	10.5	14	0	0.0310436	0.0422613	0.0560596	0.0730094	0.100042	0	1.05945	1.10598	1.17783	1.13641	1.1998	0	1	0.996965	0.889404	0.318423
			0.67	1	1	1	0.25	0	0	66.45	66.45	67.45	65.45	66.55	67.05	0.647884	0.647884	0.653372	0.642309	0.648437	0.651187	66.45	66.2	64.8	32.7	8.95	6.8	4.07855	5.71833	8.25833	10.2	0	0	0.0314146	0.0431153	0.0603259	0.0725772	0	0	1.05592	1.11097	1.16169	1.15565	0	0	1	0.996238	0.960712	0.499618
			0.68	1	1	0.9	0.2	0.05	0	69.25	68.8	69.7	68.35	68.85	67.65	0.663035	0.660645	0.665409	0.658238	0.660911	0.654459	69.25	68.5	62.4	24.75	12.1	9.8	4.05973	5.35577	7.81481	11	11	0	0.0312143	0.0403365	0.057188	0.0786969	0.0783081	0	1.04747	1.08011	1.16161	1.23734	1.13185	0	1	0.99564	0.895265	0.362107
			0.69	1	1	0.95	0.15	0.05	0	69.35	70.2	68.25	68.45	70.8	69.3	0.663564	0.668026	0.6577	0.658774	0.67114	0.6633	69.35	70.2	64.65	29.65	16.9	13	4.0925	5.59679	7.74561	10.3333	14	0	0.0314575	0.0422268	0.0561829	0.0732398	0.0978103	0	1.05433	1.09613	1.16722	1.25774	1.26177	0	1	1	0.947253	0.433163
			0.7	1	1	0.95	0.3	0.05	0	68.6	69.85	69.3	71.2	69.25	69.5	0.659577	0.666196	0.6633	0.6732	0.663035	0.664356	68.6	69.75	64.6	32.5	14.3	11.25	4.0124	5.42321	7.61842	11.3333	15	0	0.0308722	0.0407749	0.0558815	0.0817848	0.0986935	0	1.04907	1.07914	1.16361	1.42082	1.36468	0	1	0.998568	0.932179	0.456461
			0.71	1	1	0.9	0.05	0	0	71.3	70.5	71.5	69.85	72.25	72.75	0.673713	0.669587	0.674736	0.666196	0.678546	0.681061	71.3	70.45	63.85	29.25	10.45	11.75	4.07201	5.61583	7.77315	9	0	0	0.0313115	0.0424213	0.0566356	0.0676209	0	0	1.05664	1.10783	1.17933	1.13599	0	0	1	0.999291	0.893007	0.418754
			0.72	1	1	1	0.45	0	0.05	69.25	71.9	71.55	72.25	72.85	72.2	0.663035	0.676774	0.674992	0.678546	0.681561	0.678293	69.25	71.75	69.05	43.2	12.15	15.2	4.05428	5.4678	7.5	10.1111	0	14	0.0311944	0.0410526	0.0547573	0.0704857	0	0.0969452	1.05871	1.10153	1.1231	1.1859	0	1.2186	1	0.997914	0.965059	0.597924
			0.73	1	1	0.85	0.4	0.05	0	73.7	73	73.05	70.95	73.55	73.6	0.685785	0.682311	0.68256	0.671914	0.685043	0.685291	73.7	72.6	67	38.2	16.05	17.15	4.02867	5.5131	7.68137	9.75	13	0	0.031043	0.0415284	0.0562568	0.0678634	0.0913649	0	1.0711	1.09544	1.14884	1.16909	1.33774	0	1	0.994521	0.91718	0.538407
			0.74	1	1	0.95	0.3	0	0	75.9	74.05	75	74.2	74.15	74.1	0.696458	0.687507	0.692136	0.688243	0.687998	0.687753	75.9	73.85	69.35	39.25	13.45	10.55	4.12969	5.70994	7.76754	11.4167	0	0	0.0317193	0.0429768	0.0570734	0.0825623	0	0	1.05402	1.10915	1.16927	1.28495	0	0	1	0.997299	0.924667	0.528976
			0.75	1	1	1	0.3	0.05	0.05	74.5	73.6	76.15	74.55	75.5	76.4	0.689709	0.685291	0.697647	0.689952	0.694545	0.698832	74.5	73.6	73.6	42.6	16.85	15.35	4.08042	5.6944	7.73333	12.8333	14	15	0.0313471	0.0428404	0.0567674	0.0894273	0.0979427	0.097225	1.05786	1.10644	1.16288	1.34432	1.25156	1.21629	1	1	0.966513	0.571429
			0.76	1	1	1	0.35	0	0	76.55	77.85	76.85	76.05	75.25	74.25	0.699541	0.705614	0.700954	0.697172	0.693343	0.688488	76.55	77.85	75.85	46.65	16.9	12.4	4.04495	5.72226	7.79167	13	0	0	0.0311033	0.0432032	0.0570995	0.0917931	0	0	1.04816	1.09849	1.1679	1.45062	0	0	1	1	0.986988	0.613412
			0.77	1	1	0.9	0.6	0.1	0	76.35	78.3	76.25	77.6	78.1	77.45	0.698596	0.707688	0.698122	0.704456	0.706768	0.703759	76.35	78.3	71.3	51.75	16.65	12.2	4.04859	5.43893	7.90741	11.6667	14.5	0	0.0311743	0.0410385	0.0579678	0.0829765	0.0956457	0	1.05645	1.09243	1.15526	1.31348	1.22614	0	1	1	0.935082	0.666881
			0.78	1	1	0.95	0.45	0	0	77.8	78.05	79.65	77.6	77.1	78.35	0.705383	0.706538	0.713821	0.704456	0.702126	0.707917	77.8	77.95	75.45	46.95	21.85	13.3	4.10112	5.9125	7.93509	11.3333	0	0	0.0315439	0.0445629	0.0579958	0.0794064	0	0	1.05282	1.1117	1.17896	1.29795	0	0	1	0.998719	0.947269	0.605026
			0.79	1	1	1	0.45	0	0.05	78.4	79.55	78.25	78.3	79.35	79.15	0.708147	0.713372	0.707458	0.707688	0.71247	0.711565	78.4	79.5	76.35	51.65	14.2	18.15	3.95925	5.61643	7.5975	11.8889	0	17	0.0305075	0.0423009	0.0554242	0.0848674	0	0.112806	1.04347	1.06647	1.13488	1.31444	0	1.48189	1	0.999371	0.975719	0.659642
			0.8	1	1	0.95	0.6	0	0.05	79.5	80.4	80.15	79.15	79.2	80.75	0.713146	0.717173	0.71606	0.711565	0.711791	0.718724	79.5	80.3	78	48.75	11	18.1	4.04775	5.65909	8.02544	10.2917	0	13	0.0311525	0.0427392	0.0587755	0.0727354	0	0.0932111	1.05709	1.09442	1.156	1.17074	0	1.12478	1	0.998756	0.973175	0.615919
			0.81	1	1	1	0.55	0	0	81.45	80.2	81.15	81.7	80.4	80.7	0.7218	0.716283	0.720486	0.72289	0.717173	0.718503	81.45	80.1	79.8	57.35	16.15	20.2	4.05169	5.56474	8.0625	10.8182	0	0	0.031132	0.0419381	0.0587687	0.0760801	0	0	1.04806	1.08985	1.16197	1.2352	0	0	1	0.998753	0.983364	0.701958
			0.82	1	1	1	0.35	0	0.05	80.4	82.55	82.75	80.7	82.3	82.75	0.717173	0.726565	0.727423	0.718503	0.725489	0.727423	80.4	82.5	81.1	46.5	14.35	19.05	3.96886	5.54522	7.8625	10.3571	0	14	0.0305325	0.0419017	0.0572007	0.0732231	0	0.103328	1.04714	1.09339	1.16745	1.19874	0	1.17439	1	0.999394	0.98006	0.576208
			0.83	1	1	1	0.65	0.05	0	82.15	84.55	83	83.35	82.5	82.3	0.724842	0.735022	0.728491	0.72998	0.72635	0.725489	82.15	84.5	82.1	54.45	29	16.6	3.96095	5.52202	8.03417	11.1923	14	0	0.0305195	0.0416021	0.0590252	0.0787086	0.0939934	0	1.03972	1.08681	1.15483	1.20844	1.25932	0	1	0.999409	0.989157	0.653269
			0.84	1	1	1	0.75	0.05	0	84.95	83.15	83.45	83.6	84.35	83.5	0.736682	0.72913	0.730404	0.731038	0.734188	0.730615	84.95	83.05	82.75	62.7	25.15	20.5	4.0678	5.63356	8.1825	10.4667	13	0	0.0312853	0.0424495	0.0594398	0.0738546	0.0849946	0	1.04857	1.07959	1.16464	1.21454	1.1121	0	1	0.998797	0.991612	0.75
			0.85	1	1	1	0.55	0	0	85.9	83.1	84.5	86.35	85.85	84.25	0.740582	0.728917	0.734814	0.742409	0.740378	0.73377	85.9	83.05	83.1	56.9	18.1	15.95	3.96452	5.52982	7.93417	12.0909	0	0	0.0305319	0.0416892	0.0579632	0.0853741	0	0	1.04328	1.09111	1.18623	1.35525	0	0	1	0.999398	0.983432	0.658946
			0.86	1	1	1	0.7	0	0	86.4	86.3	86.8	85.7	86.25	85.4	0.742611	0.742207	0.744223	0.739766	0.742004	0.738536	86.4	86.3	84.7	66.85	19.35	18.5	4.05641	5.50192	7.53583	10.3571	0	0	0.0312127	0.041533	0.0553558	0.0736013	0	0	1.05362	1.08165	1.14702	1.2137	0	0	1	1	0.975806	0.780047
			0.87	1	1	1	0.75	0.05	0	87.05	87.25	86.7	86.75	88.1	87.65	0.745226	0.746025	0.743821	0.744023	0.749394	0.747616	87.05	87.2	85.65	66.7	25	20.7	3.98932	5.6329	7.91917	10.7333	14	0	0.0306988	0.0424704	0.0575075	0.0756711	0.0953801	0	1.04487	1.08308	1.17288	1.24473	1.20296	0	1	0.999427	0.987889	0.768876
			0.88	1	1	1	0.75	0	0.05	86.95	88.8	88.2	89.55	87.85	87.65	0.744825	0.752134	0.749787	0.755037	0.748408	0.747616	86.95	88.8	87.8	69.15	20.95	22.3	4.04277	5.76714	7.85583	10.4	0	14	0.0310661	0.0434532	0.0573646	0.0728732	0	0.0998975	1.04653	1.10161	1.13068	1.22092	0	1.28251	1	1	0.995465	0.772194
			0.89	1	1	1	0.55	0.1	0	88.55	89.8	88.75	87.65	88.05	88.35	0.751159	0.755997	0.751939	0.747616	0.749197	0.750376	88.55	89.75	88	58.6	29.4	16.5	4.02516	5.58073	7.7	11.2727	15	0	0.0309649	0.0420477	0.0562476	0.0795465	0.1044	0	1.04214	1.07807	1.1579	1.22553	1.17605	0	1	0.999443	0.991549	0.668568
			0.9	1	1	1	0.75	0.05	0	90.4	89.25	90	90.15	91.75	90.35	0.758286	0.75388	0.756762	0.757335	0.763358	0.758096	90.4	89.25	89.3	74.05	33.3	20.05	4.02833	5.53073	7.7925	10.9667	15	0	0.0310338	0.0416617	0.0567887	0.0764992	0.100724	0	1.0461	1.06638	1.14027	1.24412	1.31188	0	1	1	0.992222	0.821409
			0.91	1	1	1	0.8	0.1	0	91.65	90.75	91.8	91.2	90.35	90.35	0.762986	0.759611	0.763544	0.761304	0.758096	0.758096	91.65	90.7	91.3	73.25	26.05	26.05	4.111	5.65165	7.56333	11.2396	14.5	0	0.0316435	0.0425131	0.0553305	0.0796326	0.0995092	0	1.04291	1.08557	1.14976	1.29157	1.23293	0	1	0.999449	0.994553	0.80318
			0.92	1	1	1	0.6	0.1	0.1	91.35	91.65	93.05	92.3	92.3	92.1	0.761866	0.762986	0.768141	0.765393	0.765393	0.764655	91.35	91.6	91.95	71.5	22.6	30.05	4.14398	5.55306	7.88417	9.875	14.5	14	0.0318821	0.0417334	0.0578201	0.0695952	0.102058	0.0949548	1.05259	1.07413	1.14806	1.14797	1.32524	1.17973	1	0.999454	0.988178	0.774648
			0.93	1	1	1	0.8	0.05	0.2	91.85	92.8	93.55	93.3	91.85	93.45	0.763729	0.767229	0.769955	0.76905	0.763729	0.769593	91.85	92.8	91.6	81.15	31.65	25.65	4.00776	5.576	7.8175	11.3438	12	15.5	0.0308438	0.0420795	0.0569977	0.0789207	0.0857017	0.104385	1.0487	1.07812	1.15119	1.24495	1.15534	1.29346	1	1	0.979156	0.869775
			0.94	1	1	1	0.9	0.1	0	93	93.35	94.1	94.75	93.9	94.05	0.767959	0.769231	0.771934	0.774251	0.771216	0.771755	93	93.35	93.1	82.25	33.6	27.6	4.02634	5.63431	7.43667	10.1944	14	0	0.030979	0.0425079	0.054396	0.0713549	0.0991961	0	1.0459	1.08012	1.13591	1.16411	1.25939	0	1	1	0.989373	0.868074
			0.95	1	1	1	0.75	0.2	0	94.1	94.9	95.75	95.05	95.25	95	0.771934	0.774782	0.777769	0.775312	0.776017	0.775135	94.1	94.9	95.1	73.9	37.05	22.35	4.06991	5.66034	7.56167	11.4222	12.75	0	0.0312842	0.0426773	0.0550103	0.0798791	0.0905952	0	1.04165	1.08181	1.11628	1.25678	1.17207	0	1	1	0.993211	0.777486
			0.96	1	1	1	0.85	0.05	0.05	95.9	95.9	95.75	96.05	96.7	95.8	0.778292	0.778292	0.777769	0.778814	0.781061	0.777943	95.9	95.9	95.4	83.8	33.65	27.4	4.12811	5.66451	8.025	10.6765	14	14	0.0317479	0.0426345	0.0583692	0.0745748	0.0940318	0.0918463	1.04421	1.08111	1.14329	1.25152	1.21171	1.17521	1	1	0.996345	0.872462
			0.97	1	1	1	0.85	0.1	0.05	97.35	97	97.05	97.3	95.95	97.1	0.783285	0.78209	0.782261	0.783114	0.778466	0.782432	97.35	97	96.7	81.25	27.35	25.3	4.14822	5.73133	7.91167	10.0098	16	15	0.0318934	0.0432223	0.0577499	0.0713077	0.110007	0.104074	1.04935	1.07728	1.15705	1.15192	1.51091	1.20651	1	1	0.996394	0.835046
			0.98	1	1	1	0.9	0.2	0	97.45	98.15	97.85	98.2	98.1	97.75	0.783625	0.785991	0.78498	0.786159	0.785823	0.784642	97.45	98.15	97.45	84.75	40.65	22.7	4.00542	5.74699	7.41833	11.2037	16	0	0.0308232	0.0433387	0.0540936	0.0781793	0.107833	0	1.03893	1.08913	1.10207	1.22094	1.31507	0	1	1	0.995912	0.863035
			0.99	1	1	1	0.95	0.25	0.05	98.9	99	99.05	99	99.2	99.15	0.788497	0.788829	0.788995	0.788829	0.789492	0.789326	98.9	98.95	98.8	87.45	42.6	32.2	4.06787	5.6175	7.805	10.7018	14	12	0.0313304	0.0423406	0.0565031	0.0746548	0.0962903	0.0853489	1.04114	1.07637	1.12441	1.22712	1.25217	1.22492	1	0.999495	0.997476	0.883333
			1	1	1	1	0.8	0.15	0.15	100	100	100	100	100	100	0.79212	0.79212	0.79212	0.79212	0.79212	0.79212	100	100	99.5	84.95	45.25	36.3	4.09788	5.64792	7.72262	11.1875	15	18.6667	0.0315297	0.0425808	0.0564769	0.0777535	0.0973387	0.125636	1.04241	1.08362	1.13238	1.21031	1.1885	1.48313	1	1	0.995	0.8495
		15	0.01	0	0	0	0	0	0	2.7	2.1	2.3	2.1	2.1	2.25	0.018673	0.0145538	0.0159288	0.0145538	0.0145538	0.0155852	0.15	0	0	0	0	0	0	0	0	0	0	0	0	0	0	0	0	0	0	0	0	0	0	0	0.0555556	0	0	0
			0.02	0	0	0	0	0	0	4.9	4.1	4.1	4.15	4.45	4.4	0.03363	0.0282176	0.0282176	0.0285568	0.0305892	0.0302508	0.5	0.15	0.05	0.15	0	0	0	0	0	0	0	0	0	0	0	0	0	0	0	0	0	0	0	0	0.102041	0.0365854	0.0121951	0.0361446
			0.03	0	0	0	0	0	0	6.6	6.2	6.05	5.8	5.9	5.8	0.0450313	0.0423608	0.0413574	0.0396828	0.040353	0.0396828	0.8	0.25	0.25	0.05	0.05	0.1	0	0	0	0	0	0	0	0	0	0	0	0	0	0	0	0	0	0	0.121212	0.0403226	0.0413223	0.00862069
			0.04	0	0	0	0	0	0	9.3	8.9	9.1	8.1	9.65	9.15	0.0628634	0.0602428	0.061554	0.0549795	0.0651505	0.0618815	1.6	0.75	0.55	0.05	0.15	0.05	0	0	0	0	0	0	0	0	0	0	0	0	0	0	0	0	0	0	0.172043	0.0842697	0.0604396	0.00617284
			0.05	0	0	0	0	0	0	9.7	12.35	10.9	10.45	10.75	9.8	0.0654768	0.0826069	0.0732731	0.0703571	0.0723021	0.0661289	2	1.55	0.5	0.25	0.05	0	0	0	0	0	0	0	0	0	0	0	0	0	0	0	0	0	0	0	0.206186	0.125506	0.0458716	0.0239234
			0.06	0	0	0	0	0	0	13.6	12.95	15.35	12.8	12.8	13.45	0.0905779	0.0864417	0.101621	0.0854845	0.0854845	0.089625	4.1	0.9	0.8	0.3	0.1	0.05	0	0	0	0	0	0	0	0	0	0	0	0	0	0	0	0	0	0	0.301471	0.0694981	0.0521173	0.0234375
			0.07	0	0	0	0	0	0	15.05	15.85	14.4	16.3	15.25	15.25	0.0997374	0.104751	0.0956429	0.10756	0.100994	0.100994	3.15	1.8	0.4	0.5	0.35	0.15	0	0	0	0	0	0	0	0	0	0	0	0	0	0	0	0	0	0	0.209302	0.113565	0.0277778	0.0306748
			0.08	0.1	0	0	0	0	0	17.25	17.05	18.1	17.3	17.15	16.75	0.113459	0.11222	0.118704	0.113768	0.11284	0.110359	6.55	2.1	0.95	0.75	0.45	0.5	5.5	0	0	0	0	0	0.0188956	0	0	0	0	0	1.20708	0	0	0	0	0	0.37971	0.123167	0.0524862	0.0433526
			0.09	0.4	0	0	0	0	0	22.7	19.15	20.65	19.15	18.2	20.25	0.146556	0.125141	0.134254	0.125141	0.119319	0.131833	10.6	2.5	1.7	0.6	0.45	0.4	6.625	0	0	0	0	0	0.0225854	0	0	0	0	0	1.21215	0	0	0	0	0	0.46696	0.130548	0.0823245	0.0313316
			0.1	0.3	0	0	0	0	0	20.9	23.2	22.3	21.9	22.05	21.2	0.135764	0.14953	0.14417	0.141777	0.142675	0.137572	10.65	3.45	1.7	1.5	0.7	0.55	5.83333	0	0	0	0	0	0.0199357	0	0	0	0	0	1.22109	0	0	0	0	0	0.509569	0.148707	0.0762332	0.0684932
			0.11	0.15	0	0	0	0	0	23.75	23.35	25.1	26.75	25.35	23.55	0.15279	0.15042	0.160737	0.170349	0.1622	0.151606	9.9	2.5	1.8	1.35	0.9	0.3	5.66667	0	0	0	0	0	0.0193593	0	0	0	0	0	1.09374	0	0	0	0	0	0.416842	0.107066	0.0717131	0.0504673
			0.12	0.45	0	0	0	0	0	28.55	27.85	28.7	28.75	26.6	26.6	0.18071	0.176696	0.181567	0.181853	0.16948	0.16948	19.25	4.85	3.45	1.7	0.85	1.2	6.61111	0	0	0	0	0	0.0225637	0	0	0	0	0	1.2444	0	0	0	0	0	0.674256	0.174147	0.120209	0.0591304
			0.13	0.35	0	0	0	0	0	29.2	29.5	28.1	28.5	29	28.2	0.184419	0.186125	0.178132	0.180423	0.183279	0.178705	17.7	5.65	1.8	1.1	0.75	0.8	6.71429	0	0	0	0	0	0.0228492	0	0	0	0	0	1.20133	0	0	0	0	0	0.606164	0.191525	0.0640569	0.0385965
			0.14	0.6	0.1	0	0	0	0	32.6	33	31.25	32.1	29.95	32.6	0.20355	0.205771	0.196008	0.200765	0.188678	0.20355	25.05	9.8	3.35	1.7	1.8	0.85	6.29167	8.5	0	0	0	0	0.0215258	0.0289034	0	0	0	0	1.2109	1.14138	0	0	0	0	0.768405	0.29697	0.1072	0.0529595
			0.15	0.65	0.1	0	0	0	0	32.7	34	30.8	34.65	34.45	33.05	0.204106	0.211296	0.193478	0.214867	0.21377	0.206048	21	11.6	2.85	1.65	1.5	0.9	6.53846	10	0	0	0	0	0.0224203	0.0338021	0	0	0	0	1.23299	1.38009	0	0	0	0	0.642202	0.341176	0.0925325	0.047619
			0.16	0.55	0.05	0	0	0	0	35.35	35.65	34.75	34.5	37.45	35.4	0.218695	0.22033	0.215415	0.214045	0.230066	0.218968	29	11.9	3.75	2.25	1.8	1.35	6.01515	11	0	0	0	0	0.0204922	0.0369503	0	0	0	0	1.10459	1.26242	0	0	0	0	0.820368	0.333801	0.107914	0.0652174
			0.17	0.65	0.05	0	0	0	0	37.1	37.75	36.5	36.95	38.5	39.3	0.228182	0.231677	0.224943	0.227374	0.235689	0.239946	30	11.9	3.95	2.65	2.05	1.25	6.61538	9	0	0	0	0	0.0226571	0.030351	0	0	0	0	1.15959	1.37089	0	0	0	0	0.808625	0.315232	0.108219	0.0717185
			0.18	0.75	0.1	0	0	0	0	40.85	39.5	40.75	37.5	38.85	40	0.248126	0.241006	0.247601	0.230335	0.237554	0.243651	34	12.35	4.5	2.1	1.5	2.6	6.56111	9	0	0	0	0	0.0223801	0.0304826	0	0	0	0	1.19544	1.30183	0	0	0	0	0.832313	0.312658	0.110429	0.056
			0.19	0.8	0.2	0	0	0	0	43.8	44.75	43	42.9	41.25	41.7	0.263453	0.268321	0.259327	0.25881	0.250223	0.252575	37.9	20.75	4.75	3.05	1.6	1.2	6.80208	9	0	0	0	0	0.0231952	0.0302879	0	0	0	0	1.23908	1.29347	0	0	0	0	0.865297	0.463687	0.110465	0.0710956
			0.2	0.9	0.15	0	0	0	0	44.35	46.65	44.95	47.8	44.8	47.7	0.266275	0.277963	0.269342	0.283736	0.268577	0.283236	39.95	18.2	6.7	3.5	1.5	1.85	6.26852	9.33333	0	0	0	0	0.021466	0.0314621	0	0	0	0	1.16988	1.2536	0	0	0	0	0.900789	0.390139	0.149055	0.0732218
			0.21	0.9	0.15	0	0	0	0	45.6	46.4	48.05	49.2	45.15	44.8	0.27265	0.276701	0.284985	0.290703	0.270362	0.268577	42.3	17.25	8.95	3.05	2.35	1.7	5.92593	9.66667	0	0	0	0	0.0202359	0.0324442	0	0	0	0	1.11914	1.28614	0	0	0	0	0.927632	0.371767	0.186264	0.0619919
			0.22	1	0.2	0	0	0	0	51.05	49.45	49.75	51.6	49.2	49.6	0.299805	0.29194	0.293421	0.302488	0.290703	0.292681	50.3	20.85	8.05	2.9	3.1	1.65	6.02083	8.75	0	0	0	0	0.0205803	0.0287058	0	0	0	0	1.13766	1.18471	0	0	0	0	0.985309	0.421638	0.161809	0.0562016
			0.23	0.95	0.3	0	0	0	0	51.6	54.9	51.65	51.6	52.25	51.35	0.302488	0.318374	0.302732	0.302488	0.305646	0.30127	49.1	28.75	9.3	2.8	2.35	2.3	6.24474	8	0	0	0	0	0.0213599	0.0269167	0	0	0	0	1.13346	1.14997	0	0	0	0	0.95155	0.523679	0.180058	0.0542636
			0.24	1	0.3	0	0	0	0	54.1	52.85	55.1	55.1	50.65	52.65	0.314557	0.308549	0.319325	0.319325	0.297847	0.307583	51.55	27.6	11.4	4.4	2.05	2.25	5.78333	9.16667	0	0	0	0	0.0197978	0.030494	0	0	0	0	1.10659	1.18966	0	0	0	0	0.952865	0.522233	0.206897	0.0798548
			0.25	1	0.35	0	0	0	0	56.4	56.1	55.1	56	54.3	55.7	0.325475	0.324061	0.319325	0.323589	0.315513	0.32217	55.3	32.4	9.9	5	3.25	2	6.14417	8.71429	0	0	0	0	0.0209684	0.0294491	0	0	0	0	1.13742	1.21117	0	0	0	0	0.980496	0.57754	0.179673	0.0892857
			0.26	1	0.45	0	0	0	0	57	57.6	60.25	60.1	57.9	58.85	0.328294	0.331102	0.343363	0.342675	0.332502	0.336914	55.75	37.15	10.25	5.35	2.3	2.3	6.22333	8.16667	0	0	0	0	0.0212448	0.0275114	0	0	0	0	1.15523	1.19788	0	0	0	0	0.97807	0.644965	0.170124	0.0890183
			0.27	1	0.65	0	0	0	0	60.15	60.1	61.1	60	61.9	58.2	0.342905	0.342675	0.347248	0.342216	0.350884	0.333898	59.75	41.75	14.8	4.6	3.65	2.75	6.4275	9	0	0	0	0	0.0219513	0.0302092	0	0	0	0	1.15114	1.22564	0	0	0	0	0.99335	0.694676	0.242226	0.0766667
			0.28	0.95	0.7	0	0	0	0	63.65	62.45	66.9	62.45	65.25	63.8	0.358766	0.353371	0.373151	0.353371	0.365889	0.359437	62.55	48.3	15.35	6.55	3.9	2.55	5.97456	9.22619	0	0	0	0	0.0204166	0.0309698	0	0	0	0	1.11962	1.2296	0	0	0	0	0.982718	0.773419	0.229447	0.104884
			0.29	1	0.85	0	0	0	0	64.5	65.25	66	64	65.7	65.85	0.36256	0.365889	0.3692	0.360331	0.367878	0.368539	63.6	50.6	14.45	7.05	3.65	2.55	6.3075	9.26471	0	0	0	0	0.0215452	0.0311198	0	0	0	0	1.16141	1.21154	0	0	0	0	0.986047	0.775479	0.218939	0.110156
			0.3	1	0.7	0.05	0	0	0	70.35	65.1	68.4	64.8	67.1	69.85	0.388069	0.365224	0.379681	0.363894	0.374026	0.385929	70.15	47.65	14.75	4.2	4.1	3.25	6.29167	8.64286	9	0	0	0	0.0214663	0.0291078	0.0300006	0	0	0	1.14333	1.253	1.10742	0	0	0	0.997157	0.731951	0.215643	0.0648148
			0.31	1	0.6	0	0	0	0	70.9	69.55	70.9	68.55	71	70.2	0.390414	0.384642	0.390414	0.380331	0.39084	0.387428	70.45	51.75	16.9	6.5	3.35	4.05	6.06476	8.56944	0	0	0	0	0.0207186	0.0288447	0	0	0	0	1.1057	1.18447	0	0	0	0	0.993653	0.744069	0.238364	0.0948213
			0.32	1	0.75	0.05	0	0	0	71.65	70.7	68.9	73.4	70.15	72.85	0.393598	0.389562	0.381843	0.400961	0.387214	0.398656	71.4	52.55	15.8	7.3	3.1	2.35	5.94774	9.26667	16	0	0	0	0.0203477	0.0310822	0.0508289	0	0	0	1.11518	1.23295	1.50011	0	0	0	0.996511	0.743281	0.229318	0.099455
			0.33	1	0.9	0.05	0	0	0	75.1	76.85	78.85	74.25	76.55	75.25	0.408029	0.415217	0.423325	0.404505	0.413991	0.408648	74.7	67.75	23.55	8.3	4.55	4.85	6.00631	8.82407	13	0	0	0	0.0205501	0.0295663	0.0414622	0	0	0	1.12036	1.20169	1.24779	0	0	0	0.994674	0.881588	0.298668	0.111785
			0.34	1	0.95	0.05	0	0	0	76.15	78.75	75.65	75.9	72.05	74.1	0.412352	0.422923	0.410297	0.411326	0.395289	0.403881	75.9	73.2	27.45	7.15	4.45	4.6	5.97417	8.29825	17	0	0	0	0.0203895	0.0277069	0.054779	0	0	0	1.08804	1.16569	1.58713	0	0	0	0.996717	0.929524	0.362855	0.0942029
			0.35	1	0.95	0.1	0	0	0	78.05	80.5	80	80.4	78	78.5	0.420095	0.42993	0.427937	0.429532	0.419893	0.421914	77.85	74.15	22.7	7.4	4.75	4.7	6.29536	9.00439	12	0	0	0	0.0215283	0.0301129	0.0382884	0	0	0	1.12377	1.18939	1.26246	0	0	0	0.997438	0.921118	0.28375	0.0920398
			0.36	1	0.95	0.2	0	0	0	81.15	83.2	80.35	81.85	81.65	79.8	0.432511	0.440575	0.429333	0.435277	0.434488	0.427137	81	77.75	33.1	9.1	4.85	4.25	5.94187	8.80702	12.75	0	0	0	0.0202948	0.0294696	0.041126	0	0	0	1.09424	1.19258	1.36587	0	0	0	0.998152	0.934495	0.411948	0.111179
			0.37	1	0.95	0.05	0	0	0	83.35	83.85	81.25	83.75	83.8	82.15	0.44116	0.443108	0.432907	0.442719	0.442913	0.436459	83.3	81	23.6	10.45	5.65	4.7	6.05409	8.7807	17	0	0	0	0.0206836	0.0293602	0.0553044	0	0	0	1.1035	1.15856	1.51472	0	0	0	0.9994	0.966011	0.290462	0.124776
			0.38	1	1	0.05	0	0	0	85	89.25	87.1	84.55	83.45	85.2	0.447561	0.463711	0.455601	0.445823	0.44155	0.448332	84.7	86.75	26.6	7.05	6.1	7.85	5.94952	8.625	11	0	0	0	0.0203244	0.0288973	0.0357951	0	0	0	1.09522	1.20575	1.16385	0	0	0	0.996471	0.971989	0.305396	0.0833826
			0.39	1	0.95	0.1	0	0	0	90.4	86.9	88.2	86	85.85	88.15	0.468	0.45484	0.459766	0.451404	0.450829	0.459577	90.2	81.9	39.7	11.3	5.75	3.65	5.97679	8.79386	15.5	0	0	0	0.0204196	0.0294003	0.0500297	0	0	0	1.09437	1.17051	1.38574	0	0	0	0.997788	0.942463	0.450113	0.131395
			0.4	1	0.9	0.05	0	0	0	92.85	89.15	93.05	91.7	91.45	89.35	0.477022	0.463337	0.477751	0.472806	0.471885	0.464086	92.65	83.6	26.65	9.95	4.95	5	6.09062	8.4213	13	0	0	0	0.020803	0.0282099	0.0416941	0	0	0	1.09408	1.13955	1.36462	0	0	0	0.997846	0.937745	0.286405	0.108506
			0.41	1	1	0.25	0	0	0	91.85	91.85	92.15	96.9	88.75	90	0.473358	0.473358	0.47446	0.491601	0.461836	0.466512	91.7	88.35	42.75	14.65	6	5.25	6.08591	8.19	12.4	0	0	0	0.0207972	0.0274061	0.0408281	0	0	0	1.10214	1.13834	1.27817	0	0	0	0.998367	0.961894	0.463918	0.151187
			0.42	1	1	0.35	0	0	0	93.2	94.05	97.05	95.8	92.65	94.65	0.478298	0.481385	0.492134	0.487682	0.476291	0.483553	93.05	91.5	52.6	12.1	6.1	5.95	6.03256	9.04583	12.4286	0	0	0	0.0205836	0.0301988	0.0404946	0	0	0	1.08825	1.18434	1.31786	0	0	0	0.998391	0.972887	0.541989	0.126305
			0.43	1	1	0.3	0	0	0	96.25	95.2	95.95	95.1	95.25	97.05	0.489289	0.485532	0.488218	0.485172	0.485711	0.492134	96.15	94.05	48.7	16	6.35	6.8	5.95131	8.72667	11.3333	0	0	0	0.0203046	0.0291702	0.0371951	0	0	0	1.10201	1.18091	1.21789	0	0	0	0.998961	0.98792	0.507556	0.168244
			0.44	1	1	0.25	0	0	0	97.75	100	97.3	95.9	100.45	96.1	0.494609	0.502486	0.493019	0.48804	0.504047	0.488754	97.65	98	41.15	14.2	6.45	5.6	6.08855	8.82833	10.2	0	0	0	0.0207838	0.0295399	0.0332457	0	0	0	1.09704	1.18856	1.12853	0	0	0	0.998977	0.98	0.422919	0.148071
			0.45	1	1	0.35	0	0	0	101.1	100.85	97.9	99.55	100.9	101	0.506292	0.50543	0.495138	0.500921	0.505602	0.505947	100.75	97.65	57.75	12.65	8.5	5.4	6.1263	8.88774	12.7143	0	0	0	0.0208995	0.0296777	0.0412574	0	0	0	1.08565	1.14037	1.26423	0	0	0	0.996538	0.96827	0.589888	0.127072
			0.46	1	1	0.4	0	0	0	103.4	105	102.75	104.5	104.2	104.4	0.514156	0.519553	0.511947	0.517873	0.516862	0.517536	103.4	103.75	60.75	16.15	8.7	6.95	5.98903	8.23917	13	0	0	0	0.0204705	0.0276233	0.0423818	0	0	0	1.07601	1.12096	1.30315	0	0	0	1	0.988095	0.591241	0.154545
			0.47	1	1	0.65	0	0	0	104.5	107.55	107.55	108.6	105.15	108.15	0.517873	0.52803	0.52803	0.531477	0.520056	0.530003	104.4	106.65	72.85	16.35	8.75	8.25	6.06258	8.4525	12.4231	0	0	0	0.0207086	0.0282517	0.0400595	0	0	0	1.09116	1.1481	1.28417	0	0	0	0.999043	0.991632	0.677359	0.150552
			0.48	1	1	0.4	0.05	0	0	109.1	110.6	109.55	109.95	110.6	105.55	0.53311	0.537974	0.534575	0.535872	0.537974	0.521394	109.1	110.3	68.35	24.4	12.25	9.2	5.88881	8.64833	13	15	0	0	0.0201152	0.0289069	0.0426003	0.0461781	0	0	1.07393	1.15928	1.34539	1.17652	0	0	1	0.997288	0.623916	0.221919
			0.49	1	1	0.65	0	0	0	108.55	109.9	108.8	109.95	111	108.95	0.531314	0.53571	0.532131	0.535872	0.539262	0.532621	108.5	108.6	73.7	18.85	9.8	7.8	6.09476	8.39833	12.9615	0	0	0	0.0208231	0.02808	0.042057	0	0	0	1.09393	1.1422	1.25721	0	0	0	0.999539	0.988171	0.67739	0.171442
			0.5	1	1	0.45	0	0	0	112	112.9	111.2	112.1	110.9	113.75	0.542468	0.545333	0.539905	0.542787	0.53894	0.548023	111.95	112	58.25	18.9	11	8.2	6.0326	8.71619	12.1111	0	0	0	0.0206258	0.0291884	0.0392357	0	0	0	1.08288	1.13668	1.23586	0	0	0	0.999554	0.992028	0.523831	0.168599
			0.51	1	1	0.8	0	0	0	112.8	118.95	115.7	115.45	115.45	112.25	0.545016	0.564137	0.554135	0.553356	0.553356	0.543265	112.8	118.3	92.95	26.05	9.2	9.55	5.91676	8.79601	12.0938	0	0	0	0.0202079	0.0294233	0.0391579	0	0	0	1.07949	1.14612	1.19927	0	0	0	1	0.994536	0.803371	0.225639
			0.52	1	1	0.65	0	0	0	119.85	120.15	117.55	117.65	115.55	114.25	0.566867	0.567773	0.559856	0.560163	0.553668	0.549598	119.55	119.05	80.1	24.9	10.6	8.2	6.05494	8.53226	13.3077	0	0	0	0.0207168	0.0286124	0.0428173	0	0	0	1.08088	1.13232	1.27514	0	0	0	0.997497	0.990845	0.681412	0.211645
			0.53	1	1	0.85	0	0	0	118.15	121.5	118	118.45	119.35	119.55	0.561696	0.571828	0.561237	0.562613	0.565353	0.565959	118.15	118.85	96.9	23.25	10.45	10.95	6.0349	8.52714	12.8627	0	0	0	0.020575	0.0284419	0.0417298	0	0	0	1.07183	1.11752	1.35252	0	0	0	1	0.978189	0.821186	0.196285
			0.54	1	1	0.85	0.05	0	0	120.95	121.65	121.8	120.95	119.55	119.1	0.570181	0.572276	0.572724	0.570181	0.565959	0.564593	120.9	120.75	100.05	29.65	12.85	9.4	6.05622	8.39542	12.4706	24	0	0	0.020674	0.0281235	0.0400492	0.0738755	0	0	1.08197	1.12713	1.19749	1.84907	0	0	0.999587	0.992602	0.821429	0.245143
			0.55	1	1	0.8	0	0	0	125.1	120.1	123.25	123.4	126.1	125.25	0.582455	0.567622	0.577027	0.57747	0.58536	0.582892	125.1	119.65	99.3	26.15	13.8	11.1	5.94404	8.45667	12.5938	0	0	0	0.0203085	0.0283152	0.0408914	0	0	0	1.06666	1.13644	1.26835	0	0	0	1	0.996253	0.80568	0.211912
			0.56	1	1	0.85	0.05	0	0	126.45	128.3	126.3	125.75	124.5	129	0.586372	0.59168	0.585938	0.584345	0.580702	0.59367	126.45	128	112.4	33.45	12.8	7.6	5.91922	8.37042	11.3529	19	0	0	0.0202155	0.0280209	0.0369023	0.0604992	0	0	1.06982	1.11179	1.20307	1.43878	0	0	1	0.997662	0.889945	0.266004
			0.57	1	1	0.85	0.05	0	0	127.9	128.95	128.95	128.75	128.8	127.2	0.590538	0.593528	0.593528	0.59296	0.593102	0.588532	127.85	128.9	105.8	31.7	12.8	11.5	6.08738	8.67774	12.7647	15	0	0	0.0207898	0.0290025	0.0415103	0.0485142	0	0	1.07084	1.13049	1.23978	1.20291	0	0	0.999609	0.999612	0.820473	0.246214
			0.58	1	1	0.8	0.05	0	0	132.3	131.3	127.1	130.55	129.7	130.95	0.602924	0.600142	0.588244	0.598043	0.595651	0.599164	132.3	130.95	107.65	37.8	12.65	11	5.86994	8.45726	13.0938	14	0	0	0.0200502	0.0282486	0.0425391	0.0465097	0	0	1.06616	1.13783	1.25521	1.23354	0	0	1	0.997334	0.846971	0.289544
			0.59	1	1	0.95	0.15	0	0	131.3	132.5	133.65	131.5	132.15	130.6	0.600142	0.603478	0.606649	0.6007	0.602508	0.598184	131.25	131.9	122.65	41	12.35	12.85	6.15021	8.24935	12.4211	17.6667	0	0	0.0210056	0.0275401	0.040574	0.0553045	0	0	1.08088	1.11484	1.21031	1.34753	0	0	0.999619	0.995472	0.917695	0.311787
			0.6	1	1	0.85	0.1	0	0	134.4	135.9	135.65	134.35	137.55	135.75	0.608703	0.61278	0.612103	0.608567	0.617214	0.612374	134.4	135.65	122.55	37.7	15	11.7	6.06292	8.78089	12.4314	17.5	0	0	0.0206954	0.0293533	0.0400697	0.0538934	0	0	1.078	1.13215	1.21855	1.33679	0	0	1	0.99816	0.903428	0.28061
			0.61	1	1	0.95	0	0	0	135.75	135.4	136	138.5	134.8	137.85	0.612374	0.611425	0.61305	0.619745	0.609794	0.618015	135.75	135.25	127.7	41.65	13.3	11.7	6.02952	8.25381	11.8509	0	0	0	0.0205942	0.0275661	0.0386366	0	0	0	1.07204	1.10427	1.19201	0	0	0	1	0.998892	0.938971	0.300722
			0.62	1	1	1	0.1	0	0	137.5	139.85	140.65	138.2	140	141.05	0.617081	0.623312	0.62541	0.618947	0.623706	0.626454	137.5	139.7	129.4	28.65	15.95	15.4	6.06016	8.27772	11.875	17.5	0	0	0.0206765	0.0276426	0.0384889	0.0539381	0	0	1.0612	1.10554	1.22918	1.48512	0	0	1	0.998927	0.920014	0.207308
			0.63	1	1	1	0.2	0	0	142.6	143	141.7	140.2	141.15	142.75	0.630475	0.631505	0.628145	0.624231	0.626715	0.630861	142.6	141.5	137.1	50.1	13.3	14.55	6.08902	8.5796	12.3625	19.75	0	0	0.0207381	0.0286755	0.0400976	0.0611088	0	0	1.07796	1.11307	1.21092	1.35529	0	0	1	0.98951	0.967537	0.357347
			0.64	1	1	0.85	0.25	0	0	144.6	143.2	144.75	146.35	147.4	144.6	0.635598	0.632019	0.63598	0.640023	0.642652	0.635598	144.6	143.1	129.1	55.7	19.65	12.35	5.93172	8.55258	12.2255	16	0	0	0.0202483	0.0285757	0.0396323	0.049745	0	0	1.05465	1.13073	1.21412	1.29055	0	0	1	0.999302	0.891883	0.380594
			0.65	1	1	0.95	0.2	0	0	147.35	147.25	147.35	148.7	146.2	146.45	0.642528	0.642278	0.642528	0.645881	0.639646	0.640274	147.35	146.85	137	56.6	15.5	14.7	5.92233	8.44321	11.8728	20	0	0	0.0202301	0.0282726	0.0385899	0.0618951	0	0	1.05814	1.11515	1.21417	1.4364	0	0	1	0.997284	0.929759	0.380632
			0.66	1	1	1	0	0	0	147.4	149.25	150.85	147.8	149.7	147.25	0.642652	0.647238	0.651156	0.643649	0.648344	0.642278	147.4	148.65	140.35	49.45	20.6	12.7	6.07756	8.41058	11.825	0	0	0	0.0207584	0.0281991	0.0383254	0	0	0	1.07294	1.11239	1.17875	0	0	0	1	0.99598	0.930394	0.334574
			0.67	1	1	0.95	0.05	0	0	149.9	152.6	150.5	149.45	149.2	151.7	0.648835	0.655392	0.650303	0.64773	0.647115	0.65322	149.9	152.3	145.45	47.85	18.4	18.25	5.99802	8.19108	12.1842	20	0	0	0.0204913	0.0274209	0.0394839	0.0609335	0	0	1.0671	1.10393	1.19755	1.37124	0	0	1	0.998034	0.966445	0.320174
			0.68	1	1	0.95	0.35	0	0	153.6	153.8	152.95	154.55	153.25	153.1	0.65779	0.658267	0.656233	0.660052	0.656953	0.656593	153.6	153.55	141.5	71.6	20.2	19.35	6.04512	8.52631	12.0833	19.2857	0	0	0.020645	0.0285408	0.0392386	0.0600015	0	0	1.06413	1.12564	1.21012	1.48277	0	0	1	0.998375	0.925139	0.46328
			0.69	1	1	1	0.1	0	0	157.05	156.4	153.3	153.6	157.45	157.45	0.665934	0.664414	0.657072	0.65779	0.666865	0.666865	157.05	156.35	146.4	60.7	23.6	19.6	6.00612	8.57641	12.4533	18	0	0	0.0205123	0.028671	0.0400968	0.0564686	0	0	1.06201	1.10594	1.207	1.37299	0	0	1	0.99968	0.95499	0.395182
			0.7	1	1	1	0.35	0	0	157.15	158	157.35	157.05	157.35	156.15	0.666167	0.668142	0.666633	0.665934	0.666633	0.663828	157.15	157.95	151.3	74.2	19.4	17.2	5.90026	8.33292	11.9267	17.5714	0	0	0.0201555	0.027881	0.0384985	0.0554735	0	0	1.06476	1.10617	1.19516	1.39463	0	0	1	0.999684	0.961551	0.472461
			0.71	1	1	1	0.3	0	0	160.3	160.8	159.5	158.5	159.5	159.5	0.673428	0.674566	0.671599	0.669298	0.671599	0.671599	160.3	160.8	154.6	67.7	25.9	21.15	6.1119	8.60528	11.6767	19.3333	0	0	0.0208583	0.0286852	0.0378831	0.0594307	0	0	1.06344	1.11201	1.1743	1.42942	0	0	1	1	0.969279	0.427129
			0.72	1	1	1	0.45	0	0	160.8	161.45	165.2	162.8	161.5	164	0.674566	0.676039	0.684411	0.679078	0.676153	0.681756	160.8	161.45	162.05	87.3	20.95	18.55	6.09619	8.55476	12.1467	16.8333	0	0	0.0207826	0.0286828	0.0392893	0.0524538	0	0	1.05979	1.11236	1.18553	1.31868	0	0	1	1	0.980932	0.536241
			0.73	1	1	1	0.15	0	0	166.25	164.15	165.6	162.3	164.35	164.45	0.686716	0.682089	0.685291	0.677956	0.682532	0.682754	166.25	164.1	163.55	60.4	24.8	22.1	6.06894	8.24853	12.1125	20	0	0	0.0207364	0.0275458	0.0391889	0.0621078	0	0	1.06548	1.10182	1.17856	1.38737	0	0	1	0.999695	0.987621	0.37215
			0.74	1	1	1	0.55	0	0	166.1	164.4	165.4	167.55	165.95	165.35	0.686387	0.682643	0.684851	0.689546	0.686059	0.684741	166.1	164.35	162.05	100.65	26.5	20.9	5.95757	8.53205	11.7992	16.5455	0	0	0.0203549	0.0285222	0.0380618	0.0513786	0	0	1.05618	1.10304	1.14953	1.23349	0	0	1	0.999696	0.979746	0.600716
			0.75	1	1	1	0.3	0.05	0	170.45	166.45	168.25	168.8	167.1	169.65	0.695768	0.687153	0.69106	0.692243	0.688569	0.694064	170.45	166.4	165.05	74.95	34.7	20.25	5.93604	8.41228	11.6192	18.1667	22	0	0.0202608	0.0281405	0.0376555	0.0572462	0.0665121	0	1.0563	1.10523	1.16397	1.40087	1.28445	0	1	0.9997	0.980981	0.444017
			0.76	1	1	1	0.5	0	0	170.25	170.05	170.15	172.35	172.9	172	0.695343	0.694917	0.69513	0.699777	0.700928	0.699043	170.25	169.95	167.2	104.6	29.15	25.75	5.95543	8.34158	11.735	15.6	0	0	0.0203447	0.0279248	0.0380787	0.048403	0	0	1.0541	1.10082	1.17117	1.21197	0	0	1	0.999412	0.982662	0.606905
			0.77	1	1	1	0.45	0	0	173.55	174	172.7	172.45	175.05	172.7	0.702282	0.703216	0.70051	0.699987	0.705383	0.70051	173.55	173.9	169.9	109.6	30.3	22.75	5.96682	8.66714	11.7425	16.4444	0	0	0.0203685	0.0289761	0.0381148	0.0514889	0	0	1.05474	1.12041	1.17422	1.30711	0	0	1	0.999425	0.983787	0.635547
			0.78	1	1	1	0.45	0	0	177.8	176.5	176.45	177.9	176.05	174.95	0.710985	0.70835	0.708249	0.711187	0.707433	0.705177	177.8	176.35	173.9	99.85	37.3	18.05	6.00233	8.43016	11.8717	17.5	0	0	0.0204988	0.0282047	0.0384532	0.054241	0	0	1.05124	1.09616	1.15932	1.30829	0	0	1	0.99915	0.985548	0.56127
			0.79	1	1	1	0.5	0	0	179.85	177.45	180.2	179.15	176.7	176.75	0.715092	0.710278	0.715788	0.713697	0.708757	0.708859	179.85	177.05	175.95	94.65	26.5	24.25	6.06282	8.18878	11.3625	17.8	0	0	0.0206681	0.0273975	0.0368919	0.0549521	0	0	1.05515	1.08688	1.14757	1.27929	0	0	1	0.997746	0.976415	0.528328
			0.8	1	1	1	0.6	0	0	179.8	182.05	176.6	180.55	178.3	179.5	0.714993	0.719435	0.708554	0.716481	0.711993	0.714395	179.8	181.85	173.85	111.75	25.4	28.9	6.10495	8.46346	11.9133	16.9167	0	0	0.0208576	0.028238	0.0385822	0.0526468	0	0	1.05773	1.093	1.17403	1.27591	0	0	1	0.998901	0.984428	0.618942
			0.81	1	1	1	0.8	0	0	181.65	182.55	181.05	182.35	182.35	183.45	0.71865	0.720412	0.717469	0.720022	0.720022	0.722164	181.65	182.4	177.75	136	31.4	26.5	6.08343	8.31402	11.6583	16.3125	0	0	0.0207698	0.0277768	0.0377696	0.0512377	0	0	1.05977	1.08594	1.1632	1.25449	0	0	1	0.999178	0.981773	0.745818
			0.82	1	1	1	0.65	0	0	185.7	183.85	183.2	184.05	184.6	185	0.726494	0.722938	0.721678	0.723325	0.724385	0.725154	185.7	183.85	181.1	121.05	32.35	34.9	6.13041	8.35599	11.9183	16.4615	0	0	0.0209336	0.0279612	0.0387141	0.0517398	0	0	1.06013	1.0949	1.16008	1.27502	0	0	1	1	0.988537	0.657702
			0.83	1	1	1	0.5	0	0	185.45	186.95	184.95	185.05	188.65	184.85	0.726016	0.72887	0.725058	0.72525	0.732069	0.724866	185.45	186.75	182.45	116.5	32.25	32.2	6.11695	8.35585	12.2233	18.9	0	0	0.0208682	0.027926	0.0395373	0.0588778	0	0	1.06032	1.09084	1.20293	1.38587	0	0	1	0.99893	0.986483	0.62956
			0.84	1	1	1	0.85	0	0	190.1	188.7	188.7	187.55	189.55	188.05	0.734767	0.732162	0.732162	0.730003	0.733747	0.730944	190.1	188.7	186.85	143.15	39.3	24.4	6.00082	8.13432	11.6408	16.8725	0	0	0.0204788	0.0271745	0.0375502	0.052619	0	0	1.04997	1.08846	1.14982	1.28434	0	0	1	1	0.990196	0.763263
			0.85	1	1	1	0.8	0.05	0.05	188.2	192.25	190.95	193	190.7	190.1	0.731226	0.738719	0.736337	0.740083	0.735876	0.734767	188.2	192.25	189.95	148.6	43.15	29.9	6.05378	8.23989	11.8625	17.0938	20	22	0.0206554	0.0275782	0.0384022	0.0531901	0.0613955	0.068767	1.05237	1.08419	1.16211	1.30589	1.20034	1.33379	1	1	0.994763	0.769948
			0.86	1	1	1	0.7	0.05	0	193.5	192.95	194.75	194.85	193.75	191.3	0.740989	0.739993	0.743239	0.743419	0.741441	0.73698	193.5	192.9	193.35	136.3	53.75	27.1	6.00217	8.40198	11.3533	16.7857	24	0	0.0204841	0.0280709	0.0368676	0.0522129	0.0723999	0	1.0483	1.0947	1.15662	1.28325	1.51733	0	1	0.999741	0.992811	0.699512
			0.87	1	1	1	0.7	0.05	0	195.55	198	196.7	195.25	197.1	197.35	0.74467	0.749	0.746711	0.744134	0.747418	0.747858	195.55	198	196	144.35	41.8	31	6.07794	8.30945	11.68	16.5357	22	0	0.0207352	0.0277684	0.0378073	0.052319	0.0673655	0	1.05211	1.09416	1.1463	1.26318	1.30413	0	1	1	0.996441	0.739309
			0.88	1	1	1	0.75	0.1	0.05	198.75	199.55	197.15	198.25	199	196.25	0.75031	0.751701	0.747506	0.749437	0.750746	0.745914	198.75	199.55	195.35	157.7	44.1	34.55	5.92649	8.57158	11.4042	17.8333	20	24	0.0202348	0.0286304	0.0368412	0.0555482	0.0601187	0.0708291	1.05164	1.08839	1.13117	1.27213	1.1745	1.32117	1	1	0.99087	0.79546
			0.89	1	1	1	0.8	0.05	0	200	198.5	201.65	199.4	200.9	199.95	0.75248	0.749874	0.755315	0.751441	0.75403	0.752393	200	198.5	200.3	160.25	47.15	34.25	5.97249	8.3622	11.2739	17.4375	26	0	0.0203931	0.0279484	0.0363767	0.0538878	0.0796902	0	1.05047	1.08491	1.12789	1.29404	1.45481	0	1	1	0.993305	0.803661
			0.9	1	1	0.95	0.6	0.15	0	202.8	201.85	202.15	202.65	203.05	203.55	0.757271	0.755656	0.756167	0.757017	0.757695	0.758539	202.8	201.85	196.65	150.95	51.05	42.95	5.97355	8.37214	11.9214	16.5694	22	0	0.0203849	0.027991	0.0386648	0.051463	0.0678274	0	1.04994	1.08611	1.16809	1.2598	1.30197	0	1	1	0.972792	0.74488
			0.91	1	1	1	0.95	0	0	205.25	203.6	203.2	204.35	202.65	204.8	0.761388	0.758623	0.757948	0.759884	0.757017	0.760637	205.25	203.6	202	185.3	50	40.45	5.96836	8.34486	11.2975	16.1579	0	0	0.0203801	0.0279016	0.0366115	0.0504939	0	0	1.0484	1.0937	1.1212	1.24485	0	0	1	1	0.994094	0.906778
			0.92	1	1	1	0.8	0	0	208.25	206.5	206.35	207.6	207	205.55	0.766333	0.763461	0.763213	0.76527	0.764285	0.761887	208.25	206.5	205.75	167.85	44.25	45.75	6.14252	8.42505	11.7095	16.7917	0	0	0.0209567	0.0281528	0.037869	0.0516032	0	0	1.05005	1.08573	1.14145	1.23402	0	0	1	1	0.997092	0.808526
			0.93	1	1	1	0.9	0.1	0	210.35	208.6	208.1	210.4	210.65	209.3	0.769734	0.766903	0.766088	0.769814	0.770216	0.76804	210.35	208.6	206.5	185.75	59.95	38	6.0046	8.41175	11.8654	16.8981	28	0	0.0205056	0.0280247	0.0382882	0.0528623	0.0849252	0	1.04628	1.0892	1.15275	1.26495	1.68386	0	1	1	0.992311	0.882842
			0.94	1	1	1	0.85	0.05	0	210.8	210.5	211.1	210.7	211.9	211.15	0.770456	0.769975	0.770936	0.770296	0.772212	0.771016	210.8	210.45	210.55	175.3	68.7	50.4	6.10536	8.50016	11.7001	16.6422	20	0	0.0208405	0.0284011	0.0378011	0.0517093	0.0616324	0	1.05272	1.09063	1.1465	1.2656	1.19975	0	1	0.999762	0.997395	0.831989
			0.95	1	1	1	0.8	0	0	214.3	214.6	214.9	213.8	212.85	214.15	0.775997	0.776466	0.776933	0.775214	0.773718	0.775762	214.3	214.5	213.95	171.8	45.7	44.2	6.03883	8.36993	11.638	16.3125	0	0	0.0206086	0.0280085	0.0376291	0.0508571	0	0	1.03973	1.08638	1.1468	1.20882	0	0	1	0.999534	0.995579	0.803555
			0.96	1	1	1	1	0.2	0	215.2	216.1	215.95	217	215.7	216.95	0.7774	0.778794	0.778563	0.78018	0.778176	0.780103	215.2	216.05	214.95	189.65	104.15	48.75	6.10842	8.28386	11.3335	17.2125	24.75	0	0.0208409	0.0277226	0.0366559	0.0533675	0.0731037	0	1.05505	1.0859	1.12954	1.2719	1.43009	0	1	0.999769	0.995369	0.873963
			0.97	1	1	1	0.95	0.15	0	217.65	218.65	218.6	217.4	218.15	218.6	0.781175	0.782698	0.782622	0.780793	0.781938	0.782622	217.65	218.65	217.8	200.15	70.45	53.1	6.08435	8.34751	11.5989	16.7018	24.6667	0	0.0207901	0.0278731	0.0375245	0.0522146	0.0747101	0	1.0473	1.07576	1.13655	1.27531	1.30029	0	1	1	0.99634	0.920653
			0.98	1	1	1	0.9	0.05	0.05	220.35	220.55	220.4	220.65	220.25	221.6	0.785261	0.785561	0.785336	0.785711	0.785111	0.787127	220.35	220.55	219.65	184.9	65.3	50.5	6.01838	8.26314	11.547	15.9167	30	24	0.0205494	0.027629	0.0372428	0.0493538	0.0899373	0.0720371	1.0474	1.08499	1.12927	1.18741	1.59583	1.36282	1	1	0.996597	0.837979
			0.99	1	1	1	0.9	0	0	222.95	223.1	222.8	222.6	222.5	223.1	0.789124	0.789345	0.788903	0.788608	0.78846	0.789345	222.95	223.1	222.25	197.35	77.1	58.85	5.93766	8.25971	11.1623	16.1481	0	0	0.0202718	0.027617	0.0361464	0.0502786	0	0	1.0408	1.07248	1.13021	1.17878	0	0	1	1	0.997531	0.886568
			1	1	1	1	0.95	0.1	0.05	225	225	225	225	225	225	0.79212	0.79212	0.79212	0.79212	0.79212	0.79212	225	224.95	224.3	204.15	81.3	54.45	6.09108	8.11873	11.6443	16.5526	22	27	0.0207961	0.027174	0.0376415	0.051661	0.0663613	0.0777173	1.05006	1.06612	1.14244	1.23982	1.31294	1.27363	1	0.999778	0.996889	0.907333
		20	0.01	0	0	0	0	0	0	3.95	3.65	4.45	4.6	3.85	4.2	0.0153919	0.0142313	0.0173233	0.017902	0.0150052	0.0163581	0.1	0.1	0.05	0	0	0	0	0	0	0	0	0	0	0	0	0	0	0	0	0	0	0	0	0	0.0253165	0.0273973	0.011236	0
			0.02	0	0	0	0	0	0	7.5	8	8.9	8.7	7.5	8.2	0.0290229	0.0309276	0.0343465	0.0335878	0.0290229	0.0316884	0.55	0.15	0.05	0	0	0.1	0	0	0	0	0	0	0	0	0	0	0	0	0	0	0	0	0	0	0.0733333	0.01875	0.00561798	0
			0.03	0	0	0	0	0	0	12.45	13.7	12.05	10.8	11.35	12.25	0.0477151	0.0523782	0.0462181	0.0415247	0.0435926	0.0469669	1.3	0.5	0.25	0.25	0.35	0.2	0	0	0	0	0	0	0	0	0	0	0	0	0	0	0	0	0	0	0.104418	0.0364964	0.0207469	0.0231481
			0.04	0	0	0	0	0	0	17.9	16.3	14.85	16.6	15.75	14.55	0.0678795	0.0620043	0.056648	0.0631087	0.0599762	0.055536	3	0.55	0.5	0.35	0.15	0.05	0	0	0	0	0	0	0	0	0	0	0	0	0	0	0	0	0	0	0.167598	0.0337423	0.03367	0.0210843
			0.05	0	0	0	0	0	0	20.3	20.6	18.5	19.5	20.6	19.2	0.0766232	0.0777104	0.0700731	0.0737178	0.0777104	0.0726259	2.7	1.3	0.4	0.45	0.55	0.2	0	0	0	0	0	0	0	0	0	0	0	0	0	0	0	0	0	0	0.133005	0.0631068	0.0216216	0.0230769
			0.06	0.05	0	0	0	0	0	23.6	24.2	22.3	23.4	26.4	25.6	0.0885121	0.0906572	0.083847	0.087796	0.0984796	0.0956429	5.5	2.5	1.05	0.55	0.35	0.4	5	0	0	0	0	0	0.00924865	0	0	0	0	0	1.00349	0	0	0	0	0	0.233051	0.103306	0.0470852	0.0235043
			0.07	0	0	0	0	0	0	25.7	28.35	28.7	27.6	27.65	29.5	0.095998	0.105357	0.106585	0.102718	0.102894	0.109388	4.6	1.85	1.25	0.9	0.55	0.75	0	0	0	0	0	0	0	0	0	0	0	0	0	0	0	0	0	0	0.178988	0.0652557	0.043554	0.0326087
			0.08	0.1	0	0	0	0	0	31.65	33.2	30.85	31.05	32.05	32.45	0.116876	0.122235	0.114097	0.114792	0.118262	0.119646	9.15	4.5	1.3	0.9	0.65	0.8	8	0	0	0	0	0	0.0153504	0	0	0	0	0	1.22165	0	0	0	0	0	0.2891	0.135542	0.0421394	0.0289855
			0.09	0.2	0	0	0	0	0	35.35	34.3	35.45	37.05	36	35.5	0.129615	0.126018	0.129956	0.135406	0.131833	0.130127	12.45	2.95	2.5	1.35	0.55	0.55	10.25	0	0	0	0	0	0.0197714	0	0	0	0	0	1.38289	0	0	0	0	0	0.352192	0.0860058	0.0705219	0.0364372
			0.1	0	0	0	0	0	0	38.95	36.6	41.4	40.15	41.55	36.8	0.141833	0.133877	0.15005	0.145867	0.15055	0.134557	14.2	2.9	2.2	1.55	1.2	0.75	0	0	0	0	0	0	0	0	0	0	0	0	0	0	0	0	0	0	0.36457	0.079235	0.0531401	0.0386052
			0.11	0.2	0	0	0	0	0	45.65	41.2	44.45	42.75	43.9	45.15	0.164117	0.149382	0.160169	0.154544	0.158353	0.162475	19.45	3.3	2.2	1.25	0.95	0.5	9.75	0	0	0	0	0	0.0186841	0	0	0	0	0	1.27586	0	0	0	0	0	0.426068	0.0800971	0.0494938	0.0292398
			0.12	0.5	0	0	0	0	0	47.8	46.45	45.5	47.1	44.95	46.2	0.171145	0.166739	0.163625	0.168864	0.161817	0.165921	28.75	7.75	2.95	1.3	1.4	1.05	9.75	0	0	0	0	0	0.0186738	0	0	0	0	0	1.33445	0	0	0	0	0	0.601464	0.166846	0.0648352	0.0276008
			0.13	0.55	0	0	0	0	0	51.7	51.35	50.15	49.9	51.45	50.15	0.183743	0.18262	0.178759	0.177952	0.182941	0.178759	32.8	6.9	4.1	1.55	1.6	1.45	9.04545	0	0	0	0	0	0.0174191	0	0	0	0	0	1.30006	0	0	0	0	0	0.634429	0.134372	0.0817547	0.0310621
			0.14	0.55	0	0	0	0	0	57.2	54.8	57.5	55.35	51.9	59.6	0.201183	0.193619	0.202124	0.195359	0.184383	0.208677	36.55	9.1	3.3	2.05	2.25	1.35	8.54545	0	0	0	0	0	0.016466	0	0	0	0	0	1.21943	0	0	0	0	0	0.638986	0.166058	0.0573913	0.037037
			0.15	0.65	0.05	0	0	0	0	58.4	60.95	59	61.15	58.1	61.05	0.204939	0.212861	0.20681	0.213479	0.204002	0.21317	43.1	16	5.55	2.95	1.1	1.95	8.80769	10	0	0	0	0	0.016925	0.0190763	0	0	0	0	1.24152	1.14213	0	0	0	0	0.738014	0.26251	0.0940678	0.048242
			0.16	0.6	0	0	0	0	0	63.25	64.5	63.1	63.8	64.2	63.25	0.219938	0.223758	0.219479	0.221621	0.222843	0.219938	49.1	14.25	5.45	3.5	2.3	2.5	8.84722	0	0	0	0	0	0.016962	0	0	0	0	0	1.27565	0	0	0	0	0	0.776285	0.22093	0.0863708	0.0548589
			0.17	0.65	0.05	0	0	0	0	69.25	66.9	65.75	69.95	65.9	69.2	0.238103	0.23104	0.227559	0.240195	0.228014	0.237954	54.25	16.5	4.65	3.05	2.25	1.55	8.38462	10	0	0	0	0	0.0160994	0.0189944	0	0	0	0	1.15854	1.04053	0	0	0	0	0.783394	0.246637	0.0707224	0.0436026
			0.18	0.85	0.05	0	0	0	0	71.6	70.7	75.85	69.55	69.7	72.65	0.245102	0.242429	0.257596	0.239	0.239448	0.248208	61.5	17.85	6.8	2.8	2	2.35	8.51961	15	0	0	0	0	0.0162809	0.0284054	0	0	0	0	1.18211	1.54167	0	0	0	0	0.858939	0.252475	0.0896506	0.0402588
			0.19	1	0	0	0	0	0	74.5	77.65	78.9	77.7	76.95	79.2	0.25365	0.262826	0.266435	0.26297	0.260796	0.267299	70.5	28.45	8.55	4.35	2.6	2.6	8.11667	0	0	0	0	0	0.0155834	0	0	0	0	0	1.17007	0	0	0	0	0	0.946309	0.366388	0.108365	0.0559846
			0.2	0.95	0.25	0	0	0	0	81.3	81.15	76	82.1	77.15	77.25	0.273317	0.272888	0.258034	0.275596	0.261377	0.261667	77.7	35.7	7.05	6	2.45	2.75	8.48246	13.8	0	0	0	0	0.0163167	0.0259222	0	0	0	0	1.18216	1.35768	0	0	0	0	0.95572	0.439926	0.0927632	0.0730816
			0.21	0.95	0.15	0	0	0	0	85.1	82.15	83.4	84.55	84.3	81.1	0.28408	0.275738	0.279285	0.282532	0.281827	0.272746	79.95	33.3	8.15	5.7	3.3	1.9	8.47368	13.3333	0	0	0	0	0.0162742	0.0251364	0	0	0	0	1.17265	1.43129	0	0	0	0	0.939483	0.405356	0.0977218	0.0674157
			0.22	1	0.35	0	0	0	0	84.65	88.65	87.75	90.6	90.3	88.65	0.282814	0.293991	0.291492	0.299377	0.298551	0.293991	81.15	48	11.65	5.9	3.45	2.45	8.25167	11.8095	0	0	0	0	0.0158306	0.0221512	0	0	0	0	1.14199	1.23616	0	0	0	0	0.958653	0.541455	0.132764	0.0651214
			0.23	0.95	0.25	0	0	0	0	89.25	91.1	93.6	90.1	91.95	91.65	0.295653	0.300751	0.307583	0.298	0.303082	0.30226	86	46.75	14.9	4.35	3.6	2.3	8.17544	11.4	0	0	0	0	0.0156981	0.0215475	0	0	0	0	1.14536	1.23238	0	0	0	0	0.963585	0.513172	0.159188	0.0482797
			0.24	1	0.15	0	0	0	0	93.65	93.35	94.55	97.9	98.05	94.1	0.307719	0.306902	0.310161	0.319177	0.319578	0.308941	92.1	34.6	10.05	6.5	4.05	3.4	8.46083	12.3333	0	0	0	0	0.016244	0.0232505	0	0	0	0	1.19133	1.3056	0	0	0	0	0.983449	0.370648	0.106293	0.0663943
			0.25	1	0.2	0	0	0	0	96.95	98.1	99.65	100.95	103.2	101.25	0.316632	0.319711	0.323839	0.327282	0.3332	0.328075	94.25	51.85	13.65	8.25	3.55	5.15	8.27524	12	0	0	0	0	0.0158998	0.02276	0	0	0	0	1.13457	1.19295	0	0	0	0	0.972151	0.528542	0.136979	0.0817236
			0.26	1	0.6	0	0	0	0	102.55	105.6	100.45	105.25	101.2	102.6	0.331496	0.339455	0.32596	0.338547	0.327943	0.331627	101.7	69.5	15.85	7.6	3.35	3.95	8.14417	12.0417	0	0	0	0	0.0156559	0.022649	0	0	0	0	1.14198	1.22544	0	0	0	0	0.991711	0.658144	0.15779	0.072209
			0.27	1	0.6	0	0	0	0	109.3	108.7	105.05	108.7	110.35	106.85	0.348983	0.347448	0.338027	0.347448	0.351662	0.34269	109	71.45	17.6	6.8	4.7	4.1	8.215	11.6667	0	0	0	0	0.0157628	0.0220369	0	0	0	0	1.16171	1.21331	0	0	0	0	0.997255	0.657314	0.167539	0.0625575
			0.28	1	0.8	0	0	0	0	112.2	109.5	110.55	116.4	110.6	114.45	0.356355	0.349494	0.352171	0.366884	0.352298	0.362017	111.9	82	14.45	7.75	3.95	5.25	8.29042	12.4531	0	0	0	0	0.0159033	0.0235823	0	0	0	0	1.14076	1.30186	0	0	0	0	0.997326	0.748858	0.13071	0.0665808
			0.29	1	0.7	0	0	0	0	118.3	116.3	115.45	114.3	113.55	115.05	0.37159	0.366635	0.364518	0.361641	0.359758	0.363519	117.9	87.45	20.15	9	4.65	4.05	8.54518	12.6786	0	0	0	0	0.0163907	0.0239102	0	0	0	0	1.14872	1.2496	0	0	0	0	0.996619	0.751935	0.174534	0.0787402
			0.3	1	0.65	0	0	0	0	126.15	122.9	122	120.55	122.35	121.85	0.390667	0.38284	0.380655	0.377118	0.381506	0.38029	125.2	94.5	32.3	9.15	6.5	6.05	8.33079	11.9423	0	0	0	0	0.0159858	0.022372	0	0	0	0	1.14028	1.20292	0	0	0	0	0.992469	0.768918	0.264754	0.0759021
			0.31	1	0.8	0	0	0	0	122.4	122.95	121.6	125.95	119.95	125.85	0.381627	0.382961	0.379681	0.390188	0.375649	0.389948	122.05	98.2	22.05	9.1	6.1	4.65	8.0997	11.5938	0	0	0	0	0.0155244	0.021788	0	0	0	0	1.11618	1.16569	0	0	0	0	0.997141	0.798699	0.181332	0.0722509
			0.32	1	0.75	0	0	0	0	129.8	129.75	130.4	130.9	127.45	125.75	0.399338	0.39922	0.400752	0.401927	0.393769	0.389709	128.75	98.3	23.2	9.75	5.6	5.6	8.20512	11.6889	0	0	0	0	0.0157575	0.0220511	0	0	0	0	1.1082	1.22218	0	0	0	0	0.991911	0.757611	0.177914	0.0744843
			0.33	1	0.95	0.05	0	0	0	130.5	131.15	132.05	131.95	130.4	135.85	0.400987	0.402514	0.404622	0.404388	0.400752	0.413441	130	117.5	33.25	11.8	6.95	4.55	8.19125	11.5175	14	0	0	0	0.0157126	0.0216568	0.0261152	0	0	0	1.11866	1.19145	1.16371	0	0	0	0.996169	0.895921	0.251799	0.0894278
			0.34	1	1	0.05	0	0	0	138.8	137.75	137.05	140.15	140.95	137.4	0.420197	0.417801	0.416198	0.423262	0.425071	0.417	138.5	130.6	38.75	11.95	5.3	6.5	8.10065	12.6	15	0	0	0	0.0155505	0.023674	0.0277921	0	0	0	1.10674	1.24603	1.16493	0	0	0	0.997839	0.948094	0.282744	0.0852658
			0.35	1	0.9	0.15	0	0	0	142	137.2	141.65	138.6	142.25	143.7	0.427437	0.416542	0.42665	0.419741	0.427999	0.431247	141.85	122.4	40.85	13.4	8.25	6	8.19875	12.0648	14.6667	0	0	0	0.0157293	0.022735	0.0261224	0	0	0	1.11283	1.21741	1.1569	0	0	0	0.998944	0.892128	0.288387	0.0966811
			0.36	1	0.9	0.1	0	0	0	146	139.35	148.2	142.7	146.9	144.6	0.436361	0.421448	0.441209	0.429009	0.438349	0.433253	145.95	123.1	47.8	12.15	8.3	6.35	8.31312	11.3611	14.5	0	0	0	0.0159353	0.0214271	0.0268834	0	0	0	1.11898	1.17423	1.2747	0	0	0	0.999658	0.883387	0.322537	0.0851437
			0.37	1	1	0.1	0	0	0	144.7	147.2	150.3	146.5	146.5	149.65	0.433476	0.43901	0.445798	0.437466	0.437466	0.444382	144.7	140.4	47.95	11.65	6.55	5.75	8.1522	12.0833	23.5	0	0	0	0.0156538	0.0227214	0.0424746	0	0	0	1.12458	1.20441	1.69243	0	0	0	1	0.953804	0.319029	0.0795222
			0.38	1	1	0.05	0	0	0	151.5	148.4	152.15	150	154.9	151.4	0.448404	0.441648	0.44981	0.445145	0.45572	0.448187	151.4	141	43.2	14.75	7.1	7.4	8.038	12.4367	33	0	0	0	0.0154274	0.0233832	0.0592639	0	0	0	1.10684	1.22667	2.16584	0	0	0	0.99934	0.950135	0.28393	0.0983333
			0.39	1	0.95	0.15	0	0	0	153.45	163.75	157.45	157.65	155.75	152.5	0.452612	0.474311	0.461143	0.461566	0.457533	0.450566	153.3	154.5	50.8	13.15	6.55	6.25	8.09494	11.95	16.3333	0	0	0	0.0155421	0.0224402	0.0301591	0	0	0	1.11431	1.18801	1.27726	0	0	0	0.999022	0.943511	0.322642	0.0834126
			0.4	1	1	0.1	0	0	0	159.15	160.25	159.4	159	161.15	155.2	0.464728	0.467035	0.465253	0.464413	0.468916	0.456361	158.95	156.5	44.5	16.65	7.9	7.55	8.15663	12.27	20.5	0	0	0	0.0156653	0.023083	0.0372697	0	0	0	1.10002	1.23299	1.46742	0	0	0	0.998743	0.976599	0.279172	0.104717
			0.41	1	1	0.35	0	0	0	168.05	164.2	163.8	165.55	163.15	161.15	0.483113	0.475239	0.474414	0.478013	0.473071	0.468916	168.05	161.15	83.95	17.6	8.7	8	8.10078	12.055	17.8571	0	0	0	0.015555	0.0226802	0.032421	0	0	0	1.09137	1.19477	1.35332	0	0	0	1	0.981425	0.512515	0.106312
			0.42	1	1	0.25	0	0	0	170.5	168.8	169.85	167.55	167.55	168.75	0.488062	0.484633	0.486754	0.482097	0.482097	0.484532	170.4	166.6	65.7	22.3	10.3	9.05	8.01608	11.28	17.8	0	0	0	0.0153882	0.0212187	0.032603	0	0	0	1.10381	1.14082	1.35673	0	0	0	0.999413	0.986967	0.386812	0.133095
			0.43	1	1	0.35	0	0	0	172.75	173.2	169.35	172	172.1	172.55	0.492566	0.493461	0.485745	0.491069	0.491269	0.492167	172.75	170.75	79.55	19.3	9.9	10.4	8.05225	11.8442	18.7143	0	0	0	0.015459	0.0222673	0.0338944	0	0	0	1.08224	1.16588	1.35773	0	0	0	1	0.985855	0.469737	0.112209
			0.44	1	1	0.3	0	0	0	177.25	174.25	175.05	178.45	177.95	177.4	0.501454	0.495546	0.497128	0.503798	0.502822	0.501747	177.2	172	94.75	19	10.45	8.5	8.18005	11.7575	16.6667	0	0	0	0.0157079	0.0221291	0.0306942	0	0	0	1.10269	1.16958	1.26088	0	0	0	0.999718	0.987088	0.541274	0.106472
			0.45	1	1	0.45	0	0	0	180.3	181.4	180.1	179.55	177.75	179	0.507389	0.509513	0.507002	0.505936	0.502432	0.504868	180.2	179.8	108.25	22.65	9.8	12.4	8.12878	11.4092	17.2778	0	0	0	0.0155874	0.021447	0.0314802	0	0	0	1.10419	1.15838	1.30076	0	0	0	0.999445	0.99118	0.601055	0.126149
			0.46	1	1	0.65	0	0	0	182.65	185.1	181.85	188.95	185.05	183.65	0.511915	0.516588	0.510379	0.523842	0.516493	0.513828	182.55	183.3	119	21.15	8.1	10.1	7.97804	11.2167	17.4615	0	0	0	0.0153079	0.0211142	0.0317987	0	0	0	1.08637	1.15312	1.31216	0	0	0	0.999453	0.990276	0.654385	0.111934
			0.47	1	1	0.75	0	0	0	185.6	189.25	188.85	185.15	186.45	186.65	0.517536	0.524402	0.523655	0.516683	0.519144	0.519522	185.5	187.15	129.6	23.7	10.45	8.7	8.07569	11.4195	17.2	0	0	0	0.0155128	0.0214674	0.0311718	0	0	0	1.08732	1.14664	1.27866	0	0	0	0.999461	0.988904	0.686259	0.128004
			0.48	1	1	0.5	0	0	0	190.25	192.4	188	190.9	193.55	194.35	0.526266	0.530249	0.522062	0.527474	0.532366	0.533833	190.15	190.4	118.6	25.7	11.1	11	8.00213	11.8367	17.75	0	0	0	0.0153643	0.0222449	0.0324082	0	0	0	1.0863	1.17789	1.35937	0	0	0	0.999474	0.989605	0.630851	0.134625
			0.49	1	1	0.55	0	0	0	198.3	198.75	192.25	194.9	196.65	196.75	0.541008	0.541818	0.529972	0.534838	0.538024	0.538206	198.1	197.9	131.7	24.55	14.2	11.1	8.04376	11.3476	15.6818	0	0	0	0.0154397	0.021321	0.0288272	0	0	0	1.07688	1.13618	1.20133	0	0	0	0.998991	0.995723	0.685046	0.125962
			0.5	1	1	0.55	0	0	0	200.7	196.45	199.85	198.95	198.25	197.7	0.545313	0.537661	0.543793	0.542178	0.540918	0.539925	200.6	195.35	131.85	25.6	14.75	10.4	8.15417	11.2125	16.8182	0	0	0	0.0156537	0.0210598	0.0304077	0	0	0	1.08551	1.13904	1.25599	0	0	0	0.999502	0.994401	0.659745	0.128676
			0.51	1	1	0.7	0	0	0	204.45	204	204.1	203.75	202.85	203.8	0.55196	0.551168	0.551344	0.550727	0.549136	0.550815	204.35	200.35	155.95	27.15	12.1	11	8.07655	11.3946	16.5714	0	0	0	0.0154893	0.0214542	0.0302441	0	0	0	1.08602	1.15206	1.20163	0	0	0	0.999511	0.982108	0.764086	0.133252
			0.52	1	1	0.95	0	0	0	213.35	206.6	206.2	206.85	210.35	204	0.567349	0.555727	0.555029	0.556163	0.562222	0.551168	213.35	206.3	167.55	46.15	15.05	13.65	7.95033	11.4746	17.9649	0	0	0	0.0152459	0.0215582	0.0326695	0	0	0	1.0753	1.14094	1.31082	0	0	0	1	0.998548	0.812561	0.223109
			0.53	1	1	0.65	0	0	0	208.95	212.95	210	208	212.5	213.35	0.559808	0.566669	0.56162	0.558163	0.565902	0.567349	208.95	212.35	151.4	38	17.55	14.3	7.85983	11.1668	16.8077	0	0	0	0.0150836	0.0210152	0.0304217	0	0	0	1.07492	1.12666	1.26946	0	0	0	1	0.997182	0.720952	0.182692
			0.54	1	1	1	0	0	0	212.35	217.25	218.5	218.5	212.55	215.3	0.565646	0.573925	0.576011	0.576011	0.565987	0.570649	212.3	216.7	188.8	42.65	13.25	11.9	7.92918	11.3086	18.25	0	0	0	0.0152129	0.0212933	0.0330182	0	0	0	1.08044	1.13258	1.3065	0	0	0	0.999765	0.997468	0.864073	0.195195
			0.55	1	1	0.8	0	0	0	219.1	218.5	217.95	218.55	220.3	220.9	0.577009	0.576011	0.575094	0.576094	0.578997	0.579988	219.1	217.55	170.25	46.05	18.75	13	8.12134	11.3176	16.2812	0	0	0	0.015579	0.0212773	0.0295676	0	0	0	1.07982	1.14117	1.23235	0	0	0	1	0.995652	0.781142	0.210707
			0.56	1	1	0.85	0	0	0	224.2	220.35	225	221.1	224.9	224.65	0.585396	0.57908	0.586696	0.580318	0.586534	0.586128	224.2	220	186.25	40	16.75	12.1	7.98817	11.3933	16.6078	0	0	0	0.0153298	0.02148	0.0303602	0	0	0	1.07494	1.14898	1.24558	0	0	0	1	0.998412	0.827778	0.180914
			0.57	1	1	0.9	0	0	0	226.25	228.4	225	225.15	230.7	226.8	0.58872	0.592178	0.586696	0.58694	0.595845	0.589608	226.25	227.3	199.65	43.2	18	12.55	8.17301	11.2122	16.3519	0	0	0	0.0156716	0.021094	0.0296392	0	0	0	1.09092	1.12322	1.23679	0	0	0	1	0.995184	0.887333	0.191872
			0.58	1	1	0.85	0	0	0	232.25	226.15	232.4	230.65	233.05	232.65	0.598298	0.588559	0.598534	0.595766	0.599558	0.598928	232.25	225.05	208.35	35.6	18.5	19.6	7.99075	11.2357	16.0588	0	0	0	0.0153463	0.0210887	0.0292236	0	0	0	1.07459	1.11735	1.24088	0	0	0	1	0.995136	0.896515	0.154346
			0.59	1	1	0.95	0.05	0	0	235.65	239	238.95	233.1	237.1	232.65	0.603625	0.608806	0.608729	0.599636	0.605876	0.598928	235.65	238.65	218.55	39.55	19.3	18.75	8.02096	11.9005	16.693	29	0	0	0.0154006	0.0222987	0.0302967	0.0513744	0	0	1.07305	1.13981	1.25648	1.39323	0	0	1	0.998536	0.914626	0.16967
			0.6	1	1	0.85	0.05	0	0	242	238.6	241.7	239	239.75	241.85	0.613387	0.608191	0.612932	0.608806	0.609956	0.613159	242	237.9	209.4	56.7	18.1	20.25	7.9675	11.4599	16.1373	21	0	0	0.0152864	0.0215188	0.0294149	0.0371126	0	0	1.07167	1.13212	1.23563	1.19857	0	0	1	0.997066	0.866363	0.237238
			0.61	1	1	0.9	0.05	0	0	243.95	243.6	244.05	247.35	243.15	240.15	0.616336	0.615809	0.616487	0.621425	0.615129	0.610568	243.95	243.05	211.7	65.95	19.35	16.9	8.0325	11.5052	15.963	29	0	0	0.0154058	0.0216292	0.0290351	0.0511592	0	0	1.08046	1.13412	1.1994	1.56359	0	0	1	0.997742	0.867445	0.266626
			0.62	1	1	1	0.1	0	0	249.95	250.35	247.45	243.35	246.8	250.55	0.625271	0.625859	0.621574	0.615431	0.620606	0.626153	249.95	249.7	233.95	73.15	22.95	17.45	7.99248	11.3009	16.2167	29.5	0	0	0.0153357	0.0212157	0.0296115	0.0519266	0	0	1.07195	1.12947	1.22432	1.58245	0	0	1	0.997404	0.945444	0.300596
			0.63	1	1	0.95	0.05	0	0	252.65	250.45	252	248.5	253.25	250	0.629223	0.626006	0.628275	0.623131	0.630096	0.625344	252.55	249.9	229.5	54	26.55	20.45	7.92966	11.3765	16.4518	24	0	0	0.0152096	0.0213789	0.0300352	0.0418196	0	0	1.06645	1.13363	1.20169	1.33383	0	0	0.999604	0.997804	0.910714	0.217304
			0.64	1	1	0.95	0.25	0	0	254.9	253.7	256.7	256.95	256.25	256.2	0.632485	0.630749	0.635073	0.635431	0.634428	0.634356	254.9	253.2	245.9	92	22.6	21.35	8.08798	11.3227	16.807	24.6	0	0	0.0155264	0.0212907	0.0305255	0.0433836	0	0	1.06952	1.1264	1.21991	1.42277	0	0	1	0.998029	0.957928	0.358046
			0.65	1	1	1	0.05	0	0	257.4	258.5	259.45	259.45	259.4	260.6	0.636075	0.637644	0.638993	0.638993	0.638922	0.64062	257.4	258.2	247.05	89.4	27.15	21.3	7.9426	11.3575	16.5958	21	0	0	0.015249	0.0212978	0.0303002	0.0367374	0	0	1.06719	1.11734	1.22682	1.17892	0	0	1	0.998839	0.952207	0.344575
			0.66	1	1	1	0.1	0	0	258.05	265.25	268.45	264.85	260.55	266.9	0.637003	0.647123	0.651529	0.646568	0.640549	0.649402	258.05	265.15	257.5	86.5	18.85	16.95	8.09938	11.1011	16.145	22.5	0	0	0.0155381	0.0208513	0.0292775	0.0399288	0	0	1.0687	1.12074	1.18912	1.27159	0	0	1	0.999623	0.95921	0.3266
			0.67	1	1	0.95	0.1	0	0	266.95	267.45	271.5	266.35	266.75	270.2	0.64947	0.650158	0.655678	0.648644	0.649195	0.653916	266.95	267.1	261.45	84.75	27.6	23.15	8.0973	11.3607	15.7412	23.5	0	0	0.0155239	0.0213538	0.0285655	0.0415356	0	0	1.06886	1.12151	1.18555	1.43924	0	0	1	0.998691	0.962983	0.31819
			0.68	1	1	1	0.25	0	0	271.55	272.15	269.8	271.2	271.65	273.55	0.655746	0.656556	0.653372	0.655272	0.655881	0.658439	271.55	272.05	261.6	101.4	31.95	23.1	8.02656	11.3034	15.9225	24.6	0	0	0.0154087	0.021254	0.0290157	0.0430952	0	0	1.06936	1.12541	1.19394	1.32188	0	0	1	0.999633	0.969607	0.373894
			0.69	1	1	1	0.1	0	0	278.05	271.2	277.7	274.6	275.7	270.55	0.664422	0.655272	0.66396	0.659844	0.66131	0.654391	278.05	270.9	273.55	87.3	31.9	19.85	8.15071	11.1078	16.0858	23	0	0	0.0156416	0.0208758	0.0292061	0.0405692	0	0	1.07091	1.11129	1.20355	1.22368	0	0	1	0.998894	0.985056	0.317917
			0.7	1	1	1	0.2	0	0	279.25	282.3	280.9	275.65	279.8	278.2	0.665999	0.669976	0.668156	0.661244	0.66672	0.664619	279.25	281.95	275.65	112.65	26.55	25	8.05268	11.1982	15.9358	23	0	0	0.0154554	0.0210119	0.0289903	0.0400332	0	0	1.06269	1.10547	1.19146	1.3154	0	0	1	0.99876	0.98131	0.40867
			0.71	1	1	1	0.2	0	0	284.95	281.85	285.45	281.75	282.1	284.1	0.673392	0.669392	0.674033	0.669262	0.669717	0.6723	284.95	281.65	278.7	103.6	32.75	22.25	7.89025	11.4768	15.7567	24	0	0	0.015135	0.0215255	0.0285971	0.042363	0	0	1.05262	1.13203	1.18191	1.37797	0	0	1	0.99929	0.976353	0.367702
			0.72	1	1	1	0.3	0	0	284.85	287.35	286.65	287.95	281.5	286.35	0.673264	0.676456	0.675566	0.677218	0.668937	0.675183	284.85	287.35	282.6	120	34.05	25.95	8.01454	11.1953	15.8683	22.3333	0	0	0.0153809	0.021012	0.0289286	0.0393752	0	0	1.06495	1.11966	1.18013	1.36077	0	0	1	1	0.985871	0.416739
			0.73	1	1	1	0.3	0	0	290.9	291.2	295.45	292.35	291.35	289.6	0.680935	0.681311	0.686586	0.682747	0.681499	0.679302	290.9	290.9	289.6	140.05	37.95	31.5	8.10939	11.4449	15.6258	25.6667	0	0	0.015566	0.021507	0.0283965	0.0453348	0	0	1.06363	1.1274	1.16676	1.49754	0	0	1	0.99897	0.9802	0.479049
			0.74	1	1	1	0.2	0	0	293.4	296.4	296.8	293.7	299.2	293.1	0.684052	0.687753	0.688243	0.684424	0.691167	0.68368	293.4	296.3	292.95	121.1	41.55	24	7.95866	11.3279	16.09	24.75	0	0	0.0152712	0.0212757	0.0292941	0.0430621	0	0	1.06191	1.10766	1.20512	1.39095	0	0	1	0.999663	0.987028	0.412326
			0.75	1	1	1	0.3	0	0	298	298.7	299.8	299.15	299	298.05	0.689709	0.69056	0.691894	0.691107	0.690925	0.689769	298	298.65	294.55	127.7	32.8	29.75	7.9787	11.3062	15.9783	28	0	0	0.0153071	0.0212504	0.0290306	0.0483073	0	0	1.05649	1.10829	1.1754	1.48012	0	0	1	0.999833	0.982488	0.426876
			0.76	1	1	1	0.3	0	0	303.45	304.15	303.4	302.15	301.5	305.4	0.696279	0.697113	0.696219	0.694724	0.693944	0.698596	303.45	303.95	298.4	156.95	39.95	33.1	7.94504	11.2458	16.0405	27.6667	0	0	0.0152339	0.0211064	0.0290469	0.0479983	0	0	1.05915	1.10621	1.18059	1.53837	0	0	1	0.999342	0.98352	0.519444
			0.77	1	1	1	0.5	0	0	306.3	307.65	311.7	306.55	309.7	309.75	0.699659	0.701247	0.705961	0.699954	0.703643	0.703701	306.3	307.45	308.4	165.25	33.6	34.55	7.94969	11.2028	15.66	24.7	0	0	0.0152486	0.0210102	0.0284253	0.0433856	0	0	1.05842	1.10148	1.17155	1.39764	0	0	1	0.99935	0.989413	0.539064
			0.78	1	1	1	0.45	0	0	316	313.05	311.1	310.85	312.6	313.3	0.710885	0.707516	0.705267	0.704978	0.706998	0.707803	316	312.9	304.05	177.65	39.8	36.5	8.00756	11.127	15.9808	24.1111	0	0	0.0153677	0.0209162	0.0291078	0.0419029	0	0	1.06538	1.10068	1.1804	1.28114	0	0	1	0.999521	0.977338	0.571498
			0.79	1	1	1	0.4	0	0	317.7	319.15	318.85	313.35	316.9	317.85	0.712808	0.714439	0.714102	0.70786	0.711905	0.712977	317.7	319.1	315.65	170.4	46.45	28.25	7.93541	11.1692	15.5145	25.25	0	0	0.0152341	0.0209958	0.0282336	0.0438403	0	0	1.05049	1.0974	1.1571	1.4059	0	0	1	0.999843	0.989964	0.543801
			0.8	1	1	1	0.5	0	0	318.35	318	317.85	321.35	319.65	319.6	0.71354	0.713146	0.712977	0.716895	0.714999	0.714943	318.35	317.8	314.75	187.1	42.65	37.6	7.98574	10.9565	15.7107	23.15	0	0	0.0153262	0.0205923	0.0285952	0.0405766	0	0	1.0598	1.08746	1.1667	1.31217	0	0	1	0.999371	0.990247	0.582231
			0.81	1	1	1	0.55	0	0	323.25	325.2	322.95	322.7	324.65	324.65	0.719	0.721143	0.718669	0.718392	0.72054	0.72054	323.25	325.2	317.9	194.7	48.6	40.95	8.02825	11.2154	15.4699	22.5	0	0	0.0154091	0.0210695	0.0281374	0.0393265	0	0	1.05999	1.0947	1.1591	1.27399	0	0	1	1	0.984363	0.603347
			0.82	1	1	1	0.6	0	0	326.95	327.6	329.55	329.35	329.6	327.1	0.723053	0.723759	0.725866	0.725651	0.72592	0.723216	326.95	327.55	326.05	215.65	43.35	47.55	7.86575	11.0229	16.0699	24.5	0	0	0.0150944	0.0207076	0.0291968	0.0428421	0	0	1.05191	1.09185	1.17401	1.3553	0	0	1	0.999847	0.989379	0.654775
			0.83	1	1	1	0.55	0	0	331.05	332.3	331.45	329.2	331.2	333.65	0.727476	0.728811	0.727904	0.725489	0.727637	0.730245	331.05	332.25	328.85	199.35	49.85	41.85	7.92307	11.1257	15.8857	23.9091	0	0	0.015202	0.0209112	0.0288168	0.0422594	0	0	1.04796	1.09976	1.16617	1.35263	0	0	1	0.99985	0.992156	0.605559
			0.84	1	1	1	0.8	0	0	336.55	337.4	335.1	337.05	335.75	337.8	0.733299	0.734188	0.731776	0.733823	0.73246	0.734605	336.55	337.35	333.6	257.5	50.95	36.65	7.97673	11.2191	15.9354	22.8646	0	0	0.0153065	0.0210862	0.0289893	0.0398861	0	0	1.05621	1.09864	1.17685	1.25578	0	0	1	0.999852	0.995524	0.763982
			0.85	1	1	1	0.6	0	0	338.75	343.35	341.7	343.35	339.15	341.8	0.735594	0.740327	0.738639	0.740327	0.736009	0.738742	338.7	343.2	338.7	234.35	52.05	44.05	8.10638	11.2077	15.7087	22.5417	0	0	0.0155533	0.0210489	0.028575	0.0396242	0	0	1.05577	1.10252	1.1477	1.29817	0	0	0.999852	0.999563	0.99122	0.68254
			0.86	1	1	1	0.8	0.05	0	344.2	344.45	340.8	344.25	343.55	343.5	0.741192	0.741446	0.737714	0.741243	0.740531	0.74048	344.2	344.35	338.3	263.5	61.7	41.2	8.14198	11.0667	15.6451	24.0938	30	0	0.0156177	0.0207905	0.0284723	0.042177	0.0529507	0	1.06001	1.08877	1.1662	1.35969	1.49433	0	1	0.99971	0.992664	0.765432
			0.87	1	1	1	0.75	0	0	346.55	346.65	347.05	348.15	347.2	346.6	0.74357	0.74367	0.744073	0.745176	0.744223	0.74362	346.55	346.6	345.4	260.4	74.4	48.8	8.01821	11.0809	15.4887	25.0667	0	0	0.0153837	0.0208363	0.0281982	0.0440156	0	0	1.05947	1.09359	1.15222	1.39238	0	0	1	0.999856	0.995246	0.747953
			0.88	1	1	1	0.65	0	0	350.3	353.25	353.8	351.45	353.2	350.95	0.747318	0.750229	0.750768	0.748457	0.75018	0.747963	350.3	353.25	352.25	229.9	47.2	48.25	8.04391	11.1728	15.3418	22.9936	0	0	0.0154372	0.0209914	0.0279109	0.0400199	0	0	1.05345	1.10021	1.15029	1.31059	0	0	1	1	0.995619	0.654147
			0.89	1	1	1	0.95	0.05	0	355.05	356	355.25	355.9	357.6	356.2	0.751988	0.752912	0.752183	0.752814	0.754459	0.753105	355.05	355.9	351.55	309.3	68.1	56.6	7.98037	11.0203	16.0537	22.0263	31	0	0.0153242	0.0207074	0.0291954	0.0387514	0.0518916	0	1.0547	1.0951	1.18127	1.25782	1.30955	0	1	0.999719	0.989585	0.869064
			0.9	1	1	1	0.9	0.05	0	363.4	358	360.9	359.6	360.2	359.2	0.759989	0.754845	0.757621	0.75638	0.756953	0.755997	363.4	357.95	359.6	306.15	85.15	45.25	7.99268	11.1791	16.0277	23.9815	26	0	0.0153433	0.0209937	0.0291487	0.041837	0.0477096	0	1.05164	1.09152	1.1756	1.32807	1.30964	0	1	0.99986	0.996398	0.851363
			0.91	1	1	1	0.95	0	0	363.4	363.55	365.2	363.25	364.2	366	0.759989	0.76013	0.761679	0.759847	0.760741	0.762427	363.4	363.5	363.4	320.35	80.85	56.35	8.03755	11.2533	15.932	22.4254	0	0	0.0154238	0.0211356	0.0289658	0.0393086	0	0	1.05492	1.09376	1.16394	1.26314	0	0	1	0.999862	0.995071	0.8819
			0.92	1	1	1	0.95	0	0	368.1	368.15	368.2	368.8	366.5	368.9	0.764378	0.764424	0.76447	0.765025	0.762893	0.765117	368.1	368.15	366.7	327.65	60.65	63.1	8.01397	11.2695	15.3697	22.3246	0	0	0.0153763	0.0211765	0.028032	0.0389639	0	0	1.04963	1.09961	1.1547	1.28663	0	0	1	1	0.995926	0.888422
			0.93	1	1	1	0.95	0.05	0	371.8	371.15	372.6	373.75	372.55	372.45	0.767777	0.767183	0.768505	0.769548	0.768459	0.768369	371.8	371.1	370.3	327.4	86.1	56.2	8.09522	11.1026	15.9099	22.693	33	0	0.0155216	0.0208876	0.0289137	0.039957	0.0570149	0	1.05775	1.08815	1.16716	1.29547	1.28436	0	1	0.999865	0.993827	0.875987
			0.94	1	1	1	0.85	0.1	0	376.1	375.6	374.25	375.6	376.25	377.3	0.771665	0.771216	0.77	0.771216	0.771799	0.772738	376.1	375.55	373.45	323.9	94.45	68.3	8.06512	11.1941	15.7677	22.5588	34.5	0	0.015472	0.021004	0.0286987	0.0392995	0.0571424	0	1.05236	1.09055	1.15157	1.27511	1.45118	0	1	0.999867	0.997862	0.862354
			0.95	1	1	1	0.95	0	0.1	379.7	383.2	380.1	381.1	379.55	381.35	0.77487	0.777943	0.775224	0.776105	0.774738	0.776324	379.7	383.15	379.05	340.55	80.5	73.75	8.05	11.0243	15.5286	21.5132	0	33.5	0.0154444	0.0207154	0.0282375	0.0380588	0	0.0582932	1.05207	1.08065	1.14721	1.25823	0	1.37094	1	0.99987	0.997238	0.893597
			0.96	1	1	1	0.95	0.05	0	385.45	383.85	383	385.85	385.6	384.15	0.779897	0.778509	0.777769	0.780242	0.780026	0.77877	385.45	383.85	382.1	349.65	106.9	68.6	8.06328	11.1678	15.3418	22.2237	27	0	0.0154814	0.0209868	0.0278228	0.0386447	0.0463834	0	1.04979	1.08776	1.14354	1.23784	1.22749	0	1	1	0.99765	0.906181
			0.97	1	1	1	0.95	0.1	0	388.55	389.25	387.35	388.15	387.55	387.7	0.78256	0.783157	0.781533	0.782218	0.781704	0.781833	388.55	389.1	385.3	355.05	120.05	61.9	8.03925	11.1356	15.446	22.0219	29	0	0.0154242	0.0209168	0.0280915	0.0386541	0.0511401	0	1.0514	1.08866	1.14349	1.24602	1.39652	0	1	0.999615	0.994708	0.914724
			0.98	1	1	1	0.95	0.1	0.05	391.7	391.25	392	392.2	391.95	394.1	0.785233	0.784853	0.785486	0.785654	0.785444	0.787248	391.7	391.25	390.5	347.15	98.8	98.1	8.10401	11.0946	15.5537	22.2807	35.5	27	0.0155468	0.020836	0.0282783	0.0389983	0.0617759	0.0474874	1.05695	1.08568	1.14318	1.26057	1.64102	1.22846	1	1	0.996173	0.885135
			0.99	1	1	1	1	0.05	0	395.4	396.2	396.3	395.4	396.3	395.7	0.788331	0.788995	0.789078	0.788331	0.789078	0.78858	395.4	396.2	395.15	369.05	109.65	71.3	8.00549	11.171	15.1878	21.0792	26	0	0.0153601	0.0209639	0.0275968	0.0370874	0.0438508	0	1.05163	1.08261	1.13203	1.18937	1.2614	0	1	1	0.997098	0.933359
			1	1	1	1	0.85	0.05	0	400	400	400	400	400	400	0.79212	0.79212	0.79212	0.79212	0.79212	0.79212	400	399.95	398.7	349.7	116.85	93.85	8.07846	11.1833	15.4896	21.8824	33	0	0.0155032	0.0210148	0.0282103	0.0383699	0.055345	0	1.05055	1.08753	1.13932	1.25116	1.45533	0	1	0.999875	0.99675	0.87425
		25	0.01	0	0	0	0	0	0	6.35	7.15	5.95	6.7	5.95	5.35	0.0158326	0.0178094	0.0148427	0.016698	0.0148427	0.013356	0.45	0	0.1	0.1	0.05	0	0	0	0	0	0	0	0	0	0	0	0	0	0	0	0	0	0	0	0.0708661	0	0.0168067	0.0149254
			0.02	0	0	0	0	0	0	12.75	13	12.25	11.75	13.25	13.25	0.0315363	0.0321446	0.0303185	0.0290992	0.0327525	0.0327525	0.7	0.7	0.35	0.1	0	0	0	0	0	0	0	0	0	0	0	0	0	0	0	0	0	0	0	0	0.054902	0.0538462	0.0285714	0.00851064
			0.03	0	0	0	0	0	0	18.05	18.65	18.75	17.5	19.1	19.05	0.044351	0.045791	0.0460308	0.0430291	0.0468696	0.0467498	1.8	1.15	0.35	0.3	0.2	0.15	0	0	0	0	0	0	0	0	0	0	0	0	0	0	0	0	0	0	0.099723	0.0616622	0.0186667	0.0171429
			0.04	0	0	0	0	0	0	24.5	24.15	24.5	29.05	23.8	24.85	0.0597178	0.0588903	0.0597178	0.070409	0.0580621	0.0605445	2.45	1.5	1.1	0.45	0.2	0.2	0	0	0	0	0	0	0	0	0	0	0	0	0	0	0	0	0	0	0.1	0.0621118	0.044898	0.0154905
			0.05	0	0	0	0	0	0	30.5	29.3	32.5	30.35	32.5	33.8	0.0737905	0.0709929	0.0784345	0.0734413	0.0784345	0.0814406	4.15	1.25	1.05	0.9	0.6	0.25	0	0	0	0	0	0	0	0	0	0	0	0	0	0	0	0	0	0	0.136066	0.0426621	0.0323077	0.029654
			0.06	0.05	0	0	0	0	0	40.15	34.25	36.4	35.3	36.7	38.35	0.0959838	0.0824788	0.0874233	0.0848969	0.0881111	0.0918848	9.4	2.8	1.85	0.7	0.3	0.6	11	0	0	0	0	0	0.0135189	0	0	0	0	0	1.28593	0	0	0	0	0	0.234122	0.0817518	0.0508242	0.01983
			0.07	0	0	0	0	0	0	42.85	45.1	43.35	43.6	44.75	44.3	0.102098	0.107161	0.103225	0.103788	0.106375	0.105364	6.85	3.8	1.55	1.25	0.55	0.8	0	0	0	0	0	0	0	0	0	0	0	0	0	0	0	0	0	0	0.15986	0.0842572	0.0357555	0.0286697
			0.08	0.1	0	0	0	0	0	49.85	51.4	51.65	51.5	50.5	48.65	0.117756	0.121186	0.121738	0.121407	0.119196	0.115091	15.85	4.2	2.3	0.8	0.8	0.8	10	0	0	0	0	0	0.0122158	0	0	0	0	0	1.15757	0	0	0	0	0	0.317954	0.0817121	0.0445305	0.015534
			0.09	0.05	0	0	0	0	0	58.8	57.25	53.2	55.9	54.15	54.8	0.13738	0.134013	0.125153	0.131069	0.127239	0.128664	17.8	4.65	2.4	1.05	1.45	1.25	11	0	0	0	0	0	0.0135107	0	0	0	0	0	1.18666	0	0	0	0	0	0.302721	0.0812227	0.0451128	0.0187835
			0.1	0.25	0	0	0	0	0	61	63.1	62.25	58.7	63.6	64.45	0.142136	0.146652	0.144827	0.137163	0.147723	0.149542	26.85	5.95	2.4	1.95	1.35	1.3	10.4	0	0	0	0	0	0.0127113	0	0	0	0	0	1.17282	0	0	0	0	0	0.440164	0.0942948	0.0385542	0.0332198
			0.11	0.1	0	0	0	0	0	67.9	68.75	67.95	69.35	71.1	67.8	0.156884	0.158684	0.15699	0.159951	0.163638	0.156673	26.85	7.85	3.35	1.85	2.1	1.5	10.5	0	0	0	0	0	0.0129257	0	0	0	0	0	1.22795	0	0	0	0	0	0.395434	0.114182	0.049301	0.0266763
			0.12	0.25	0	0	0	0	0	77	73.65	73.5	77.1	77.2	77.65	0.175948	0.168981	0.168668	0.176155	0.176362	0.177293	41	9.1	4.7	2.45	1.9	1.65	9.9	0	0	0	0	0	0.0122106	0	0	0	0	0	1.18065	0	0	0	0	0	0.532468	0.123557	0.0639456	0.0317769
			0.13	0.5	0	0	0	0	0	86.1	82.85	83.45	81.45	80.8	79.7	0.194581	0.187975	0.189199	0.185113	0.183781	0.181521	55.85	15.35	4.8	2.3	1.9	1.8	10.9	0	0	0	0	0	0.0134366	0	0	0	0	0	1.21791	0	0	0	0	0	0.648664	0.185275	0.0575195	0.0282382
			0.14	0.35	0	0	0	0	0	88.1	85.9	88.2	86.45	85.15	87.5	0.19862	0.194176	0.198821	0.195289	0.192656	0.19741	51.35	14.5	5.7	3.05	2.35	1.8	11	0	0	0	0	0	0.0134794	0	0	0	0	0	1.2512	0	0	0	0	0	0.58286	0.168801	0.0646259	0.0352805
			0.15	0.6	0	0	0	0	0	91.7	92.05	92.9	91	98.95	94.55	0.205838	0.206536	0.208229	0.204439	0.220177	0.211506	58.65	12.85	8.1	3.4	3.25	2.5	10.2917	0	0	0	0	0	0.0126588	0	0	0	0	0	1.19312	0	0	0	0	0	0.639586	0.139598	0.0871905	0.0373626
			0.16	0.9	0	0	0	0	0	100.95	98.65	98.2	104.55	103.35	100.15	0.224087	0.219589	0.218706	0.231076	0.228753	0.222525	83.8	20.3	7.9	4.55	3.4	2.4	11.1528	0	0	0	0	0	0.0136667	0	0	0	0	0	1.22348	0	0	0	0	0	0.830114	0.205778	0.0804481	0.0435198
			0.17	0.9	0	0	0	0	0	105.95	106.95	108.2	102.9	105.6	103.25	0.233777	0.2357	0.238097	0.22788	0.233102	0.228559	93.75	17.85	8.75	3.7	2.7	2.05	10.963	0	0	0	0	0	0.0134372	0	0	0	0	0	1.2319	0	0	0	0	0	0.884851	0.1669	0.0808688	0.0359572
			0.18	0.85	0	0	0	0	0	111.2	113.05	115.35	113	115.6	115.95	0.24382	0.247328	0.251666	0.247233	0.252136	0.252794	98.35	31.05	9.45	4.3	3.45	3.6	10.7108	0	0	0	0	0	0.0131816	0	0	0	0	0	1.19954	0	0	0	0	0	0.884442	0.274657	0.0819246	0.0380531
			0.19	0.95	0.05	0	0	0	0	120.5	116.7	115.3	118.45	122.9	122.3	0.26129	0.254201	0.251572	0.257474	0.265732	0.264624	113.45	26.75	9.6	5	3.05	2.8	10.5965	14	0	0	0	0	0.0130389	0.0166411	0	0	0	0	1.18865	1.16084	0	0	0	0	0.941494	0.22922	0.0832611	0.0422119
			0.2	0.95	0.15	0	0	0	0	128.05	126.6	128.45	128.45	123.65	123.25	0.275175	0.272529	0.275903	0.275903	0.267115	0.266378	117.4	43	11.1	3.1	3.35	2.85	10.8737	14.6667	0	0	0	0	0.0133323	0.0177591	0	0	0	0	1.17512	1.24889	0	0	0	0	0.916829	0.339652	0.0864149	0.0241339
			0.21	0.95	0.2	0	0	0	0	131.7	135.35	131.55	130.9	131.5	132.15	0.281794	0.288352	0.281523	0.280348	0.281432	0.282605	125.9	52.4	9.8	6.15	3.5	3.5	10.4605	14	0	0	0	0	0.0128326	0.016916	0	0	0	0	1.1832	1.23763	0	0	0	0	0.955961	0.387144	0.0744964	0.0469824
			0.22	1	0.2	0	0	0	0	135.75	140.3	140.75	135.35	140.3	138.45	0.289067	0.29715	0.297945	0.288352	0.29715	0.293875	131.95	58	14.75	5.85	4.55	2.45	10.5567	15	0	0	0	0	0.0129625	0.0179801	0	0	0	0	1.18775	1.28673	0	0	0	0	0.972007	0.4134	0.104796	0.0432213
			0.23	1	0.25	0	0	0	0	141.7	143.9	143.7	142.45	143.65	148.9	0.299619	0.303481	0.303131	0.300938	0.303043	0.312179	139	59.3	14.5	6.25	4.3	4.8	10.3425	16.3	0	0	0	0	0.0127056	0.0196054	0	0	0	0	1.15928	1.34192	0	0	0	0	0.980946	0.412092	0.100905	0.043875
			0.24	1	0.45	0	0	0	0	153.3	151.15	149.2	151.1	149.85	150.2	0.319743	0.316057	0.312697	0.315972	0.313819	0.314423	152.2	76.95	16	10	5.25	3.05	10.6467	16.8889	0	0	0	0	0.0130768	0.02036	0	0	0	0	1.16935	1.35823	0	0	0	0	0.992825	0.509097	0.107239	0.0661813
			0.25	1	0.4	0	0	0	0	155.65	152.5	158.55	151.95	151.9	154.75	0.323749	0.318374	0.32866	0.317431	0.317345	0.322218	154.5	78.35	25.05	8.1	4.9	4.55	10.4808	15.6875	0	0	0	0	0.0128648	0.0189823	0	0	0	0	1.15202	1.27038	0	0	0	0	0.992612	0.51377	0.157994	0.053307
			0.26	1	0.65	0	0	0	0	166.5	160.25	165.9	158.65	161.8	164	0.341941	0.331522	0.340948	0.328829	0.334121	0.337793	165.8	104.6	16.6	9.9	4.45	4.8	10.4782	16.8077	0	0	0	0	0.0128757	0.0202356	0	0	0	0	1.13925	1.34953	0	0	0	0	0.995796	0.65273	0.10006	0.0624015
			0.27	1	0.55	0	0	0	0	168.4	169.15	170.7	165.55	170.55	169.5	0.345076	0.346309	0.34885	0.340368	0.348605	0.346884	166.25	103.25	21.6	8	6.3	6.6	10.2054	15.8182	0	0	0	0	0.0125263	0.0191642	0	0	0	0	1.13886	1.22776	0	0	0	0	0.987233	0.610405	0.126538	0.0483238
			0.28	1	0.7	0	0	0	0	175.1	173.25	177.8	177.65	172.9	173.35	0.356011	0.35301	0.360367	0.360125	0.352441	0.353173	174.45	126.5	31.8	7.85	5.85	4.6	10.2801	16.4524	0	0	0	0	0.0126265	0.0199201	0	0	0	0	1.13456	1.32479	0	0	0	0	0.996288	0.730159	0.178853	0.044188
			0.29	1	0.8	0	0	0	0	180	183.7	184.8	178.45	182.85	179.45	0.363894	0.369781	0.371521	0.361411	0.368434	0.363014	179.1	150.8	22	9.55	7.35	5.1	10.3224	14.7708	0	0	0	0	0.0126665	0.0177896	0	0	0	0	1.13656	1.24982	0	0	0	0	0.995	0.820904	0.119048	0.0535164
			0.3	1	0.85	0	0	0	0	190.85	189.2	189.95	190.95	189	190.75	0.381005	0.378433	0.379603	0.381161	0.37812	0.38085	190.65	158.6	36.25	9.05	5.5	6.75	10.2756	15.4216	0	0	0	0	0.0126153	0.018592	0	0	0	0	1.13916	1.25155	0	0	0	0	0.998952	0.838266	0.19084	0.0473946
			0.31	1	0.95	0	0	0	0	189.55	192.55	197.15	196.2	193.6	195.9	0.378979	0.383644	0.390729	0.389272	0.385269	0.388812	189.35	173.25	30.3	11.5	7.25	5.6	10.5369	14.9211	0	0	0	0	0.0129255	0.0180024	0	0	0	0	1.1506	1.23659	0	0	0	0	0.998945	0.899766	0.15369	0.0586137
			0.32	1	0.9	0	0	0	0	205	200.45	201.1	197	196.85	198.9	0.402632	0.395761	0.396747	0.390499	0.390269	0.393403	204.7	176.8	35.55	11	7.55	6.2	10.243	15.1389	0	0	0	0	0.0125669	0.0182093	0	0	0	0	1.12781	1.23735	0	0	0	0	0.998537	0.882015	0.176778	0.0558376
			0.33	1	0.9	0	0	0	0	206.05	210.3	206.5	205.6	206	209.4	0.404206	0.410536	0.404879	0.403532	0.404131	0.409201	205.8	183.25	43.25	13.55	9.25	7.4	10.5968	15.0444	0	0	0	0	0.013006	0.0181027	0	0	0	0	1.14752	1.20438	0	0	0	0	0.998787	0.871374	0.209443	0.0659047
			0.34	1	0.95	0.05	0	0	0	215.45	212.25	212.4	211.25	212.65	212.2	0.418116	0.413418	0.413639	0.411942	0.414007	0.413344	215.05	193.1	43.6	16.1	6.8	6.9	10.382	16.3772	24	0	0	0	0.0127456	0.0197337	0.0280578	0	0	0	1.11081	1.27192	1.45418	0	0	0	0.998143	0.909776	0.205273	0.076213
			0.35	1	0.9	0.05	0	0	0	214.15	219.35	220.6	222.45	218.9	217.65	0.416212	0.423792	0.425599	0.428264	0.42314	0.421325	213.85	203	58.95	14.15	8.85	7.55	10.3346	14.6713	29	0	0	0	0.0126697	0.0175757	0.0341179	0	0	0	1.12581	1.17993	1.46361	0	0	0	0.998599	0.925462	0.267226	0.0636098
			0.36	1	1	0.15	0	0	0	221.4	222.3	227.45	223.65	219.75	226.85	0.426753	0.428048	0.435404	0.429986	0.424371	0.434552	221.2	208.4	62.45	14.5	6.3	7.75	10.4094	15.1875	21.6667	0	0	0	0.0127719	0.0183087	0.0255438	0	0	0	1.12232	1.20201	1.40195	0	0	0	0.999097	0.937472	0.274566	0.0648334
			0.37	1	1	0.05	0	0	0	233.25	225	233.85	232.2	228.85	228.95	0.443574	0.431916	0.444412	0.442104	0.437387	0.437528	233.15	216.85	75.85	19.9	9	9.45	9.98581	14.6825	23	0	0	0	0.0122577	0.017675	0.0259922	0	0	0	1.09558	1.19876	1.34988	0	0	0	0.999571	0.963778	0.324353	0.085702
			0.38	1	1	0.2	0	0	0	230.05	236.75	236.5	236.35	234.9	237.65	0.439081	0.448447	0.448101	0.447892	0.445877	0.449693	230	228.7	79.8	20.65	10.1	7.85	10.1201	15.3333	20.75	0	0	0	0.0124263	0.0184398	0.0243178	0	0	0	1.11612	1.21931	1.27663	0	0	0	0.999783	0.965998	0.337421	0.0873704
			0.39	1	1	0.15	0	0	0	246.65	238.05	245.65	241	236.8	245.6	0.462001	0.450246	0.460647	0.454307	0.448516	0.46058	246.45	228.15	84.05	18.75	9.95	10.8	10.2041	14.6017	19	0	0	0	0.0125326	0.0175603	0.0221888	0	0	0	1.10966	1.16068	1.2072	0	0	0	0.999189	0.958412	0.342153	0.0778008
			0.4	1	1	0.15	0	0	0	255.1	251.95	247.8	247.85	252.2	246.95	0.473306	0.46912	0.463554	0.463621	0.469454	0.462407	255.05	244.1	87.5	15.8	10.45	7.9	10.1084	14.9592	21.3333	0	0	0	0.0124037	0.0179825	0.0252183	0	0	0	1.09796	1.21084	1.35248	0	0	0	0.999804	0.968843	0.353107	0.0637482
			0.41	1	1	0.4	0	0	0	256.8	265.8	258.3	258.5	255.2	255.9	0.475552	0.487281	0.477525	0.477788	0.473439	0.474364	256.6	261.8	122.7	26.55	10.65	9.15	10.059	14.9895	23.1875	0	0	0	0.0123457	0.0180368	0.0272472	0	0	0	1.09566	1.22252	1.40449	0	0	0	0.999221	0.984951	0.475029	0.102708
			0.42	1	1	0.2	0	0	0	259	267.05	262.45	260.05	258.3	260.05	0.478444	0.48889	0.482946	0.479818	0.477525	0.479818	258.75	263	107.55	20.75	10.95	9.95	9.88822	14.1367	21.25	0	0	0	0.0121423	0.0170218	0.0248489	0	0	0	1.09319	1.16414	1.3226	0	0	0	0.999035	0.984834	0.409792	0.0797923
			0.43	1	1	0.55	0	0	0	267.7	269.55	272.65	270.55	264.1	268.65	0.489724	0.492091	0.496033	0.493366	0.485086	0.490941	267.45	261.6	160.8	25.75	14.8	10.4	10.324	14.5839	20.5909	0	0	0	0.0126656	0.0175244	0.0239619	0	0	0	1.10403	1.19831	1.27728	0	0	0	0.999066	0.970506	0.589767	0.0951765
			0.44	1	1	0.5	0	0	0	277.2	271.8	276.95	272.05	279.3	276.15	0.501763	0.494955	0.50145	0.495272	0.504386	0.500447	277	269.5	174.35	21.9	12.75	11.8	10.2286	14.8108	21.95	0	0	0	0.0125593	0.0177821	0.0256598	0	0	0	1.09971	1.1821	1.36092	0	0	0	0.999278	0.991538	0.629536	0.0804999
			0.45	1	1	0.45	0	0	0	279.7	283.7	286.7	285	282.6	280.1	0.504884	0.509836	0.513518	0.511435	0.508479	0.505381	279.7	281.65	167.85	28.95	11.15	12.35	10.1942	14.3771	21.2222	0	0	0	0.0125235	0.017296	0.024753	0	0	0	1.10187	1.15391	1.34305	0	0	0	1	0.992774	0.585455	0.101579
			0.46	1	1	0.4	0	0	0	287.55	287.75	287.95	283	286.45	293.15	0.514556	0.5148	0.515044	0.508973	0.513212	0.521341	287.45	285.2	147.75	26.25	14.9	13.3	10.255	14.4526	21.5417	0	0	0	0.0125829	0.0173656	0.0252909	0	0	0	1.09491	1.16198	1.29114	0	0	0	0.999652	0.991138	0.51311	0.0927562
			0.47	1	1	0.65	0	0	0	296.8	293.65	293.35	294.3	294	294.95	0.525712	0.521942	0.521581	0.522722	0.522362	0.523501	296.8	291.35	185.85	38.3	14.1	14.3	9.92531	14.2632	23.5	0	0	0	0.0121796	0.0171245	0.0274987	0	0	0	1.08826	1.14809	1.38805	0	0	0	1	0.992168	0.633544	0.130139
			0.48	1	1	0.65	0	0	0	302.2	304.35	296.4	296.6	300.7	297	0.532105	0.534627	0.525235	0.525473	0.530338	0.52595	302.2	301.45	207.05	29.55	16.9	15	10.0034	14.3741	22.9615	0	0	0	0.0122716	0.0172641	0.0266265	0	0	0	1.09009	1.15334	1.30386	0	0	0	1	0.990471	0.698549	0.0996291
			0.49	1	1	0.7	0	0	0	302.9	303.5	303.5	302.7	307.75	305.7	0.532927	0.533631	0.533631	0.532693	0.538586	0.536203	302.9	301.9	193.65	30.15	16.85	12.7	10.1555	14.3426	22.1071	0	0	0	0.0124671	0.0172478	0.0257331	0	0	0	1.0944	1.16489	1.33961	0	0	0	1	0.994728	0.638056	0.0996036
			0.5	1	1	0.6	0	0	0	315.55	305.1	309.85	315.05	309.85	308.95	0.547543	0.535503	0.541015	0.546975	0.541015	0.539976	315.5	303.15	212.9	39.25	20.2	12.45	10.1033	14.9719	21.7639	0	0	0	0.012412	0.0179844	0.0252228	0	0	0	1.08585	1.19081	1.2984	0	0	0	0.999842	0.993609	0.687107	0.124583
			0.51	1	1	0.65	0	0	0	322.3	319.85	320	318.3	321.05	317.45	0.555155	0.552407	0.552576	0.55066	0.553755	0.549699	322.3	319.1	204.5	43.55	14.9	14.7	10.0589	14.3601	22.2436	0	0	0	0.0123559	0.0172474	0.0258481	0	0	0	1.08807	1.15294	1.34202	0	0	0	1	0.997655	0.639062	0.136821
			0.52	1	1	0.85	0	0	0	321.45	325	324.95	323.2	330.9	327	0.554203	0.558163	0.558107	0.55616	0.564666	0.560378	321.35	323.55	260.15	37.05	19.8	15.45	10.2665	14.2968	20.1176	0	0	0	0.0125908	0.0171848	0.0233848	0	0	0	1.0952	1.13863	1.21063	0	0	0	0.999689	0.995538	0.800585	0.114635
			0.53	1	1	0.9	0	0	0	331.1	333.4	331.15	331.75	334.55	333.8	0.564885	0.567393	0.56494	0.565595	0.568642	0.567828	331.1	332.8	266.45	49.35	17.3	19.55	10.0773	13.9988	21.5278	0	0	0	0.0123704	0.0168503	0.0250103	0	0	0	1.07909	1.13276	1.29465	0	0	0	1	0.9982	0.80462	0.148757
			0.54	1	1	0.85	0	0	0	341.45	334.55	335	332.5	334.5	331.25	0.576058	0.568642	0.569129	0.566413	0.568587	0.565049	341.25	333.55	283.95	47.4	21.25	14.65	10.102	14.3032	20.5196	0	0	0	0.0124004	0.017183	0.0239446	0	0	0	1.08708	1.15034	1.24729	0	0	0	0.999414	0.997011	0.847612	0.142556
			0.55	1	1	0.95	0	0	0	349	347.2	346.85	344.9	349.75	343.95	0.584026	0.58214	0.581772	0.579718	0.584809	0.578713	348.95	345.85	308.55	51.6	19.4	17.1	10.0949	14.2383	21.3158	0	0	0	0.0123877	0.0171054	0.0248932	0	0	0	1.08072	1.1398	1.25724	0	0	0	0.999857	0.996112	0.889578	0.149609
			0.56	1	1	0.9	0	0	0	349.4	352.3	348.45	352.9	351.6	351.55	0.584444	0.587462	0.583451	0.588083	0.586735	0.586683	349.4	350.95	306.15	55.5	21.25	19	10.1	14.4189	21.463	0	0	0	0.0123962	0.0173303	0.0249914	0	0	0	1.0802	1.14675	1.2687	0	0	0	1	0.996168	0.878605	0.157268
			0.57	1	1	0.95	0.05	0	0	352.25	355.7	357.75	357.7	355.75	351	0.58741	0.590972	0.593074	0.593023	0.591023	0.586112	352.25	354.85	323.95	71.05	19.75	16.35	9.94411	14.2025	20.3947	26	0	0	0.012212	0.0170852	0.0238109	0.0294851	0	0	1.07299	1.14176	1.23577	1.17583	0	0	1	0.99761	0.905521	0.19863
			0.58	1	1	0.95	0	0	0	362.6	361.5	361.75	364.3	357.55	362.2	0.598004	0.596891	0.597144	0.599718	0.592869	0.5976	362.6	360.75	319.65	55	25.25	17.3	9.95699	14.0135	21.5614	0	0	0	0.0122263	0.0168487	0.0251317	0	0	0	1.0711	1.11524	1.26425	0	0	0	1	0.997925	0.883621	0.150974
			0.59	1	1	0.9	0	0	0	363.4	374.9	369.25	377.1	374.55	371	0.598811	0.610241	0.604667	0.61239	0.609898	0.606402	363.3	374.3	329.35	70.7	24.2	18.65	10.0493	14.2543	20.8426	0	0	0	0.012334	0.0171308	0.0242481	0	0	0	1.07812	1.13393	1.2383	0	0	0	0.999725	0.9984	0.891943	0.187483
			0.6	1	1	1	0	0	0	371	377.55	370.7	370.45	379.6	375.1	0.606402	0.612828	0.606105	0.605857	0.614818	0.610437	371	376.5	345.7	73.7	25.7	23.2	10.1394	14.2536	21.25	0	0	0	0.0124491	0.017139	0.0247443	0	0	0	1.07509	1.12656	1.25941	0	0	0	1	0.997219	0.93256	0.198947
			0.61	1	1	1	0.05	0	0	383.15	382.7	378.6	379.1	380.3	374.65	0.618239	0.617807	0.613849	0.614333	0.615495	0.609996	383.15	381.8	351.05	77.05	21.75	19.45	10.1065	14.1621	20.9125	38	0	0	0.0124127	0.0170158	0.024368	0.0426435	0	0	1.08583	1.12947	1.23693	1.54728	0	0	1	0.997648	0.927232	0.203245
			0.62	1	1	1	0	0	0	386.1	386.9	385.5	383.8	386.4	386.75	0.621059	0.62182	0.620487	0.618862	0.621345	0.621678	386.1	386.55	365.35	86.75	23	19.35	10.0319	14.2693	21.7533	0	0	0	0.0123096	0.0171638	0.0253478	0	0	0	1.07381	1.12789	1.27551	0	0	0	1	0.999095	0.94773	0.226029
			0.63	1	1	0.95	0	0	0	391.3	392.75	394.75	397	394.15	391.45	0.625979	0.62734	0.629208	0.631299	0.628649	0.62612	391.3	392.25	371.6	91.9	27.6	23.85	10.0665	13.9969	20.1386	0	0	0	0.01236	0.0167984	0.0234456	0	0	0	1.07554	1.12125	1.21872	0	0	0	1	0.998727	0.941355	0.231486
			0.64	1	1	0.95	0.1	0	0	400.5	400.9	399.85	399.45	399.15	396.4	0.634528	0.634895	0.633931	0.633563	0.633286	0.630743	400.5	399	378.6	93.55	32.35	29.75	10.0178	14.0639	20.464	26.5	0	0	0.0122893	0.0168915	0.0238029	0.0301106	0	0	1.0713	1.11142	1.25107	1.33721	0	0	1	0.995261	0.946855	0.234197
			0.65	1	1	0.95	0.05	0	0	404.7	404.5	409.85	410.2	408.45	406.95	0.638366	0.638184	0.643016	0.64333	0.641758	0.640405	404.6	403.9	389.9	83.5	30.1	22.05	10.0382	13.9418	20.9263	30	0	0	0.0123181	0.0167418	0.0242729	0.0332029	0	0	1.07123	1.1129	1.23447	1.55766	0	0	0.999753	0.998517	0.951324	0.203559
			0.66	1	1	1	0.1	0	0	410.15	413.95	413.6	412.7	410.55	411.85	0.643285	0.646676	0.646365	0.645564	0.643644	0.644806	410.15	413.35	398	106.65	31.3	25.95	9.97961	14.3431	20.495	26.5	0	0	0.012252	0.0172204	0.0238779	0.0296496	0	0	1.06969	1.12161	1.22909	1.28498	0	0	1	0.998551	0.962282	0.25842
			0.67	1	1	1	0.2	0	0	420.5	419.6	419.1	422.5	420.75	419.55	0.652445	0.651658	0.65122	0.654187	0.652663	0.651614	420.5	419.15	407.25	147.55	24.9	22.55	10.1093	13.9635	20.9467	35.75	0	0	0.0124085	0.0167813	0.0243894	0.0399543	0	0	1.07764	1.11528	1.24747	1.52624	0	0	1	0.998928	0.971725	0.349231
			0.68	1	1	1	0.1	0	0	428.1	428.25	423.9	428.85	425.25	427.05	0.65902	0.659149	0.655402	0.659663	0.656569	0.658119	428.1	428	409.5	131.45	27.75	24.1	10.02	14.062	20.0567	33.5	0	0	0.0123064	0.0169071	0.0234206	0.0372601	0	0	1.06545	1.11573	1.2163	1.47722	0	0	1	0.999416	0.96603	0.306517
			0.69	1	1	1	0.1	0	0	433.4	435.2	433.15	428.7	432.45	437.85	0.663532	0.665051	0.663321	0.659534	0.662728	0.667274	433.4	434.6	422.85	138.7	33.7	30.8	9.91479	13.9842	19.9683	31	0	0	0.0121664	0.0168157	0.0232945	0.0346921	0	0	1.06023	1.1099	1.18835	1.43875	0	0	1	0.998621	0.976221	0.323536
			0.7	1	1	0.95	0.15	0	0	435.25	437.25	433.75	439.35	438.45	432.75	0.665093	0.666772	0.663828	0.668526	0.667776	0.662982	435.25	436.9	410.95	160.75	35.5	21.75	9.99228	14.0334	20.8412	38	0	0	0.0122749	0.0168668	0.0242696	0.0422188	0	0	1.0626	1.10456	1.21913	1.60473	0	0	1	0.9992	0.947435	0.365881
			0.71	1	1	1	0.35	0	0	439.1	444.9	446.45	444.15	442.6	441.8	0.668318	0.673118	0.674389	0.672501	0.671223	0.670561	439.1	444.7	440.1	215.7	42.5	31.4	9.93012	14.2388	20.1474	32.2857	0	0	0.0121951	0.0170871	0.023426	0.0357894	0	0	1.06385	1.12246	1.21482	1.39622	0	0	1	0.99955	0.985777	0.485647
			0.72	1	1	1	0.2	0	0	447.05	451.8	446.65	448.55	449.3	453.5	0.674879	0.678738	0.674552	0.676103	0.676713	0.680107	447.05	451.65	440.45	178.9	34.6	32.65	9.95656	14.0293	19.9658	30.625	0	0	0.0122277	0.0168363	0.0231483	0.0345213	0	0	1.06637	1.11039	1.19295	1.43321	0	0	1	0.999668	0.986119	0.398841
			0.73	1	1	1	0.5	0	0	456.2	459.75	458.35	458	457.85	459.75	0.682271	0.685093	0.683983	0.683705	0.683586	0.685093	456.2	459.55	450	219.85	37.7	35.45	10.1165	14.0544	20.14	30.9	0	0	0.0124159	0.0168682	0.0234332	0.0344576	0	0	1.06976	1.1062	1.20367	1.34858	0	0	1	0.999565	0.981782	0.480022
			0.74	1	1	1	0.3	0	0	459.75	457.45	460.2	465.15	461.25	461.1	0.685093	0.683267	0.685449	0.689338	0.686278	0.68616	459.75	457.05	454.25	224.45	40.9	34.65	10.052	14.0914	19.7437	28.5833	0	0	0.0123368	0.016924	0.0229365	0.0323567	0	0	1.06375	1.11345	1.1781	1.29606	0	0	1	0.999126	0.987071	0.482533
			0.75	1	1	1	0.2	0	0	471.3	461.45	467.7	467.75	466.85	467.55	0.694103	0.686436	0.691323	0.691361	0.690662	0.691206	471.3	461.25	461.5	228.35	41.45	44.45	9.91584	13.8076	19.9435	27.75	0	0	0.0121685	0.0165944	0.0231897	0.0310902	0	0	1.06037	1.10102	1.19404	1.21577	0	0	1	0.999567	0.986744	0.488188
			0.76	1	1	1	0.55	0	0	475	477.75	481	473.8	475.25	473.55	0.696934	0.699022	0.70147	0.696019	0.697125	0.695828	475	477.5	473.1	238	48.2	41.4	10.0128	14.265	20.354	29.2727	0	0	0.0122884	0.017131	0.0236462	0.0328082	0	0	1.06271	1.11471	1.20423	1.33691	0	0	1	0.999477	0.983576	0.502322
			0.77	1	1	1	0.5	0	0	482.85	479.3	482.95	483.65	482.5	479.5	0.702855	0.700192	0.702929	0.703452	0.702593	0.700342	482.85	479.15	477.8	269.85	48.3	44.75	9.86043	14.0438	19.7529	30.1	0	0	0.0121017	0.0168959	0.0230021	0.0337155	0	0	1.05249	1.10452	1.1898	1.3356	0	0	1	0.999687	0.989336	0.557945
			0.78	1	1	1	0.4	0	0	484.45	487.5	488.1	488	489.1	488.5	0.704047	0.706307	0.70675	0.706676	0.707486	0.707044	484.45	487.15	483.55	279.9	55.6	37.9	9.96833	14.006	19.8467	28.75	0	0	0.0122321	0.0168302	0.0230212	0.0326617	0	0	1.06453	1.10835	1.18317	1.33653	0	0	1	0.999282	0.990678	0.573566
			0.79	1	1	1	0.65	0	0	490.7	494.15	494.25	498.8	494.95	493.7	0.70866	0.711175	0.711248	0.714531	0.711755	0.710848	490.7	494.1	490.35	318.8	61.8	42.25	9.82511	13.9061	19.7448	29.5385	0	0	0.012066	0.0167135	0.0229872	0.0330014	0	0	1.05754	1.10365	1.17731	1.36208	0	0	1	0.999899	0.992109	0.639134
			0.8	1	1	1	0.6	0	0	499.5	500.3	502.7	502.7	498.55	502.55	0.715033	0.715605	0.717315	0.717315	0.714351	0.717209	499.5	500.3	496.9	315.25	52.4	41.6	9.99976	14.1904	19.6778	29.5833	0	0	0.012268	0.0170229	0.0228815	0.0333028	0	0	1.06312	1.11277	1.17051	1.35189	0	0	1	1	0.988462	0.627114
			0.81	1	1	1	0.7	0	0	509.65	511.6	508.6	506.35	505	509.6	0.72221	0.723568	0.721476	0.719897	0.718945	0.722175	509.65	511.45	503.15	360.8	70.9	49.7	9.95016	13.8527	20.083	29.1071	0	0	0.012215	0.0166508	0.0233486	0.0323868	0	0	1.05441	1.09513	1.19451	1.3156	0	0	1	0.999707	0.989284	0.712551
			0.82	1	1	1	0.75	0	0	508.95	509.6	515.75	510.9	512.55	512.75	0.721721	0.722175	0.726436	0.723081	0.724227	0.724366	508.85	509.5	512.75	378	67.95	40.1	10.0584	14.0901	19.432	28.1	0	0	0.012345	0.0169327	0.0225737	0.0315244	0	0	1.06201	1.10781	1.15861	1.28523	0	0	0.999804	0.999804	0.994183	0.739871
			0.83	1	1	1	0.8	0	0	519	516.85	518.6	517.15	518.3	523.1	0.728662	0.727192	0.728389	0.727397	0.728184	0.731443	519	516.75	516.1	374.9	72	47.4	10.1178	13.9469	19.7405	29.7188	0	0	0.0124296	0.0167427	0.0229553	0.0334818	0	0	1.06287	1.10307	1.16764	1.32944	0	0	1	0.999807	0.995179	0.724935
			0.84	1	1	1	0.7	0	0	522.2	525.35	523.85	522.8	523.9	526.1	0.730835	0.732958	0.731949	0.731241	0.731983	0.733461	522.2	525.3	520.95	391.2	62.6	52.85	9.98929	13.944	19.77	27.8214	0	0	0.0122684	0.016752	0.0229812	0.0312687	0	0	1.06274	1.09619	1.17514	1.29251	0	0	1	0.999905	0.994464	0.748279
			0.85	1	1	1	0.85	0	0	531.6	530	532	528.5	532	529.8	0.73712	0.73606	0.737384	0.735064	0.737384	0.735928	531.6	529.9	528.85	406.1	70.85	53.95	9.95049	14.0549	19.7722	28.6863	0	0	0.012209	0.0168812	0.0229632	0.0319618	0	0	1.05688	1.09331	1.16824	1.2737	0	0	1	0.999811	0.994079	0.768401
			0.86	1	1	1	0.75	0	0	536.55	538.95	538.15	536	534.55	539.75	0.74037	0.741931	0.741412	0.740011	0.739062	0.74245	536.55	538.95	534.8	377.95	73.05	70.1	10.1662	13.9457	19.7955	29.8667	0	0	0.0124772	0.0167624	0.0230001	0.0334851	0	0	1.05766	1.09846	1.17931	1.32106	0	0	1	1	0.993775	0.705131
			0.87	1	1	1	0.9	0	0	542.25	543.05	543.15	546.25	545.5	544.05	0.744063	0.744577	0.744641	0.746623	0.746145	0.745218	542.25	542.9	540.75	420.2	82.55	54.9	10.074	13.9688	19.6363	29.5093	0	0	0.0123663	0.0167818	0.0228709	0.0332311	0	0	1.05648	1.09507	1.16292	1.33488	0	0	1	0.999724	0.995581	0.769245
			0.88	1	1	1	0.95	0	0	547.7	547.65	551.5	548.55	553	548.65	0.747544	0.747513	0.749944	0.748083	0.750885	0.748147	547.7	547.6	548.75	465.95	96.25	59.6	9.98054	14.0794	19.597	28.614	0	0	0.0122451	0.0169115	0.0227608	0.0321811	0	0	1.05699	1.10276	1.163	1.29524	0	0	1	0.999909	0.995014	0.849421
			0.89	1	1	1	0.9	0	0	552.65	558.15	556.85	555.35	556.5	558.1	0.750666	0.754089	0.753284	0.752352	0.753067	0.754058	552.65	558.1	555.1	469.4	90.1	65.55	10.018	14.2174	19.6232	29.3333	0	0	0.0122935	0.0170726	0.0228148	0.0328675	0	0	1.05826	1.11462	1.16787	1.31678	0	0	1	0.99991	0.996857	0.845233
			0.9	1	1	1	0.9	0.05	0	561.75	561.5	560.95	565.75	563.95	563.3	0.756304	0.75615	0.755813	0.758741	0.757647	0.757251	561.75	561.4	558.65	475.7	96.85	69.05	10.0042	13.9455	19.781	29.5093	36	0	0.0122776	0.0167503	0.0229718	0.0329998	0.0384201	0	1.05566	1.09792	1.16432	1.34565	1.22949	0	1	0.999822	0.9959	0.840831
			0.91	1	1	1	0.95	0.1	0.05	571.9	565.1	568.7	568.8	566.65	567.65	0.762442	0.758347	0.760523	0.760583	0.759286	0.75989	571.9	565	566.5	489.35	106.25	88.15	9.9685	13.9444	19.6505	30.2281	40.5	36	0.0122375	0.0167472	0.0228607	0.0338994	0.0445111	0.0387415	1.05498	1.09749	1.15917	1.34155	1.41164	1.20772	1	0.999823	0.996132	0.86032
			0.92	1	1	1	0.95	0	0	574	574.45	574.85	575.95	574.15	575.95	0.763692	0.763959	0.764196	0.764847	0.763781	0.764847	574	574.4	570.7	492.75	91.85	68.9	9.92868	13.9357	19.5137	28.2325	0	0	0.0121929	0.0167592	0.0226678	0.0317538	0	0	1.05335	1.09423	1.1566	1.31496	0	0	1	0.999913	0.992781	0.855543
			0.93	1	1	1	0.9	0	0	582.55	580	581.85	579.55	581.85	582.35	0.768716	0.767229	0.768309	0.766965	0.768309	0.768599	582.55	579.9	579.35	492.85	125.7	75.3	10.0176	14.1157	19.5893	28.4074	0	0	0.0122983	0.0169474	0.0228112	0.0319504	0	0	1.04962	1.10537	1.16502	1.31879	0	0	1	0.999828	0.995703	0.850401
			0.94	1	1	1	1	0	0	587.95	589.55	587.55	586.9	588.2	587.6	0.771833	0.772749	0.771604	0.771231	0.771977	0.771633	587.95	589.55	585.7	545.9	87.3	80.9	9.96848	13.8149	19.4814	27.725	0	0	0.0122329	0.01661	0.0226575	0.0310095	0	0	1.05509	1.09429	1.14566	1.26274	0	0	1	1	0.996851	0.930141
			0.95	1	1	1	0.9	0	0	596.05	595.65	593.75	593.85	595.3	592.9	0.776431	0.776207	0.775135	0.775192	0.77601	0.774654	596.05	595.55	592.5	533.55	115.6	77.5	9.95682	13.8799	19.8071	28.0185	0	0	0.0122183	0.0166778	0.0230059	0.0313352	0	0	1.05294	1.08507	1.1691	1.27554	0	0	1	0.999832	0.997895	0.898459
			0.96	1	1	1	1	0.1	0	599.2	598.5	598.05	598.75	599.35	600.15	0.778194	0.777804	0.777552	0.777943	0.778278	0.778723	599.2	598.5	596.55	547.15	134.75	81.55	9.95519	14.0085	19.3679	28.8333	39	0	0.0122194	0.0168389	0.0225225	0.0321102	0.0433357	0	1.04752	1.08846	1.14204	1.29749	1.44078	0	1	1	0.997492	0.91382
			0.97	1	1	1	1	0.05	0	607.1	605.85	604.45	605.25	606.5	606.5	0.782555	0.781871	0.781102	0.781541	0.782227	0.782227	607.1	605.6	603.65	565.95	158.65	112.25	9.9146	13.9107	19.3036	27.575	54	0	0.0121719	0.0167208	0.0224301	0.0308846	0.0578885	0	1.04509	1.0925	1.15199	1.26217	1.81097	0	1	0.999587	0.998676	0.935068
			0.98	1	1	1	1	0	0	612.8	612.7	612.05	611.1	612.25	611.5	0.785648	0.785594	0.785243	0.78473	0.785351	0.784946	612.8	612.65	610.8	580.1	115.85	85.35	9.98713	13.7806	19.127	27.5425	0	0	0.0122578	0.0165511	0.0222612	0.0308193	0	0	1.04893	1.08464	1.13747	1.26242	0	0	1	0.999918	0.997958	0.949272
			0.99	1	1	1	1	0.1	0	619.1	618.65	618.95	619.7	618.35	618.85	0.789015	0.788776	0.788935	0.789333	0.788617	0.788882	619.1	618.6	616.25	592.15	151.1	104.35	9.92902	13.915	19.3166	28.4508	47.5	0	0.0121884	0.016711	0.0224654	0.0317666	0.0513038	0	1.05025	1.08539	1.14464	1.2749	1.67117	0	1	0.999919	0.995638	0.955543
			1	1	1	1	0.95	0.05	0	625	625	625	625	625	625	0.79212	0.79212	0.79212	0.79212	0.79212	0.79212	625	624.9	623.55	563.25	178.85	123.3	9.83026	13.686	18.9992	28.257	39	0	0.0120655	0.016442	0.0221044	0.0317437	0.0419347	0	1.04419	1.08599	1.13405	1.28209	1.3642	0	1	0.99984	0.99768	0.9012
																	wt%	Phi Exp	Phi Theo
																	0	0	0																												(	0.0173233	,
																	0.01	0.0509	0.0461																												(	0.0343465	,
																	0.06	0.2063	0.1463																												(	0.0462181	,
																	0.1	0.237	0.214																												(	0.056648	,
																	0.2	0.302	0.342																												(	0.0700731	,
																	0.25	0.4059	0.3968																												(	0.083847	,
																	0.33	0.4655	0.4775																												(	0.106585	,
																	0.5	0.615	0.6299																												(	0.114097	,
																																															(	0.129956	,
																																															(	0.15005	,
																																															(	0.160169	,
																																															(	0.163625	,
																																															(	0.178759	,
																																															(	0.202124	,
																																															(	0.20681	,
																																															(	0.219479	,
																																															(	0.227559	,
																																															(	0.257596	,
																																															(	0.266435	,
																																															(	0.258034	,
																																															(	0.279285	,
																																															(	0.291492	,
																																															(	0.307583	,
																																															(	0.310161	,
																																															(	0.323839	,
																																															(	0.32596	,
																																															(	0.338027	,
																																															(	0.352171	,
																																															(	0.364518	,
																																															(	0.380655	,
																																															(	0.379681	,
																																															(	0.400752	,
																																															(	0.404622	,
																																															(	0.416198	,
																																															(	0.42665	,
																																															(	0.441209	,
																																															(	0.445798	,
																																															(	0.44981	,
																																															(	0.461143	,
																																															(	0.465253	,
																																															(	0.474414	,
																																															(	0.486754	,
																																															(	0.485745	,
																																															(	0.497128	,
																																															(	0.507002	,
																																															(	0.510379	,
																																															(	0.523655	,
																																															(	0.522062	,
																																															(	0.529972	,
																																															(	0.543793	,
																																															(	0.551344	,
																																															(	0.555029	,
																																															(	0.56162	,
																																															(	0.576011	,
																																															(	0.575094	,
																																															(	0.586696	,
																																															(	0.586696	,
																																															(	0.598534	,
																																															(	0.608729	,
																																															(	0.612932	,
																																															(	0.616487	,
																																															(	0.621574	,
																																															(	0.628275	,
																																															(	0.635073	,
																																															(	0.638993	,
																																															(	0.651529	,
																																															(	0.655678	,
																																															(	0.653372	,
																																															(	0.66396	,
																																															(	0.668156	,
																																															(	0.674033	,
																																															(	0.675566	,
																																															(	0.686586	,
																																															(	0.688243	,
																																															(	0.691894	,
																																															(	0.696219	,
																																															(	0.705961	,
																																															(	0.705267	,
																																															(	0.714102	,
																																															(	0.712977	,
																																															(	0.718669	,
																																															(	0.725866	,
																																															(	0.727904	,
																																															(	0.731776	,
																																															(	0.738639	,
																																															(	0.737714	,
																																															(	0.744073	,
																																															(	0.750768	,
																																															(	0.752183	,
																																															(	0.757621	,
																																															(	0.761679	,
																																															(	0.76447	,
																																															(	0.768505	,
																																															(	0.77	,
																																															(	0.775224	,
																																															(	0.777769	,
																																															(	0.781533	,
																																															(	0.785486	,
																																															(	0.789078	,
																																															(	0.79212	,
[truncated: 40 more columns]

## Sheet: Plots
		Percolation Probability vs P																											Average Percolation Path Area vs Total Filling Area
		r=0.025		r=0.05		r=0.1		r=0.2		r=0.4		r=0.5				Phi (Filling Area Fraction) vs P													r=0.025		r=0.05		r=0.1		r=0.2		r=0.4		r=0.5				r=0.025		r=0.05		r=0.1		r=0.2
		P	P Perc	P	P Perc	P	P Perc	P	P Perc	P	P Perc	P	P Perc			P	r=0.025	r=0.05	r=0.1	r=0.2	r=0.4	r=0.5							Phi	Aper	Phi	Aper	Phi	Aper	Phi	Aper	Phi	Aper	Phi	Aper			Phi	Tau	Phi	Tau	Phi	Tau	Phi
		0.05	0	0.14	0	0.32	0	0.58	0	0.85	0	0.94	0			0.01	0.0153919	0.0142313	0.0173233	0.017902	0.0150052	0.0163581							0.0766232	0	0.193619	0	0.400752	0	0.595766	0	0.736009	0	0.772738	0			0.0766232	0	0.193619	0	0.400752	0	0.595766
		0.06	0.05	0.15	0.05	0.33	0.05	0.59	0.05	0.86	0.05	0.95	0.1			0.02	0.0290229	0.0309276	0.0343465	0.0335878	0.0290229	0.0316884		wt%	Phi Exp	Phi Theo			0.0885121	0.00924865	0.212861	0.0190763	0.404622	0.0261152	0.599636	0.0513744	0.740531	0.0529507	0.776324	0.0582932			0.0885121	1.00349	0.212861	1.14213	0.404622	1.16371	0.599636
		0.08	0.1	0.17	0.05	0.34	0.05	0.6	0.05	0.89	0.05	0.98	0.05			0.03	0.0477151	0.0523782	0.0462181	0.0415247	0.0435926	0.0469669		0	0	0			0.116876	0.0153504	0.23104	0.0189944	0.416198	0.0277921	0.608806	0.0371126	0.754459	0.0518916	0.787248	0.0474874			0.116876	1.22165	0.23104	1.04053	0.416198	1.16493	0.608806
		0.09	0.2	0.18	0.05	0.35	0.15	0.61	0.05	0.9	0.05	1	0			0.04	0.0678795	0.0620043	0.056648	0.0631087	0.0599762	0.055536		0.01	0.0509	0.0461			0.129615	0.0197714	0.242429	0.0284054	0.42665	0.0261224	0.621425	0.0511592	0.756953	0.0477096	0.78858	0			0.129615	1.38289	0.242429	1.54167	0.42665	1.1569	0.621425
		0.11	0.2	0.2	0.25	0.36	0.1	0.62	0.1	0.93	0.05					0.05	0.0766232	0.0777104	0.0700731	0.0737178	0.0777104	0.0726259		0.06	0.2063	0.1463			0.164117	0.0186841	0.272888	0.0259222	0.441209	0.0268834	0.615431	0.0519266	0.768459	0.0570149					0.164117	1.27586	0.272888	1.35768	0.441209	1.2747	0.615431
		0.12	0.5	0.21	0.15	0.37	0.1	0.63	0.05	0.94	0.1					0.06	0.0885121	0.0906572	0.083847	0.087796	0.0984796	0.0956429		0.1	0.237	0.214			0.171145	0.0186738	0.275738	0.0251364	0.445798	0.0424746	0.623131	0.0418196	0.771799	0.0571424					0.171145	1.33445	0.275738	1.43129	0.445798	1.69243	0.623131
		0.13	0.55	0.22	0.35	0.38	0.05	0.64	0.25	0.96	0.05					0.07	0.095998	0.105357	0.106585	0.102718	0.102894	0.109388		0.2	0.302	0.342			0.183743	0.0174191	0.293991	0.0221512	0.44981	0.0592639	0.635431	0.0433836	0.780026	0.0463834					0.183743	1.30006	0.293991	1.23616	0.44981	2.16584	0.635431
		0.14	0.55	0.23	0.25	0.39	0.15	0.65	0.05	0.97	0.1					0.08	0.116876	0.122235	0.114097	0.114792	0.118262	0.119646		0.25	0.4059	0.3968			0.201183	0.016466	0.300751	0.0215475	0.461143	0.0301591	0.638993	0.0367374	0.781704	0.0511401					0.201183	1.21943	0.300751	1.23238	0.461143	1.27726	0.638993
		0.15	0.65	0.24	0.15	0.4	0.1	0.66	0.1	0.98	0.1					0.09	0.129615	0.126018	0.129956	0.135406	0.131833	0.130127		0.33	0.4655	0.4775			0.204939	0.016925	0.306902	0.0232505	0.465253	0.0372697	0.646568	0.0399288	0.785444	0.0617759					0.204939	1.24152	0.306902	1.3056	0.465253	1.46742	0.646568
		0.16	0.6	0.25	0.2	0.41	0.35	0.67	0.1	0.99	0.05					0.1	0.141833	0.133877	0.15005	0.145867	0.15055	0.134557		0.5	0.615	0.6299			0.219938	0.016962	0.319711	0.02276	0.474414	0.032421	0.648644	0.0415356	0.789078	0.0438508					0.219938	1.27565	0.319711	1.19295	0.474414	1.35332	0.648644
		0.17	0.65	0.26	0.6	0.42	0.25	0.68	0.25	1	0.05					0.11	0.164117	0.149382	0.160169	0.154544	0.158353	0.162475							0.238103	0.0160994	0.339455	0.022649	0.486754	0.032603	0.655272	0.0430952	0.79212	0.055345					0.238103	1.15854	0.339455	1.22544	0.486754	1.35673	0.655272
		0.18	0.85	0.27	0.6	0.43	0.35	0.69	0.1							0.12	0.171145	0.166739	0.163625	0.168864	0.161817	0.165921							0.245102	0.0162809	0.347448	0.0220369	0.485745	0.0338944	0.659844	0.0405692							0.245102	1.18211	0.347448	1.21331	0.485745	1.35773	0.659844
		0.19	1	0.28	0.8	0.44	0.3	0.7	0.2							0.13	0.183743	0.18262	0.178759	0.177952	0.182941	0.178759							0.25365	0.0155834	0.349494	0.0235823	0.497128	0.0306942	0.661244	0.0400332							0.25365	1.17007	0.349494	1.30186	0.497128	1.26088	0.661244
		0.2	0.95	0.29	0.7	0.45	0.45	0.71	0.2							0.14	0.201183	0.193619	0.202124	0.195359	0.184383	0.208677							0.273317	0.0163167	0.366635	0.0239102	0.507002	0.0314802	0.669262	0.042363							0.273317	1.18216	0.366635	1.2496	0.507002	1.30076	0.669262
		0.21	0.95	0.3	0.65	0.46	0.65	0.72	0.3							0.15	0.204939	0.212861	0.20681	0.213479	0.204002	0.21317							0.28408	0.0162742	0.38284	0.022372	0.510379	0.0317987	0.677218	0.0393752							0.28408	1.17265	0.38284	1.20292	0.510379	1.31216	0.677218
		0.22	1	0.31	0.8	0.47	0.75	0.73	0.3							0.16	0.219938	0.223758	0.219479	0.221621	0.222843	0.219938							0.282814	0.0158306	0.382961	0.021788	0.523655	0.0311718	0.682747	0.0453348							0.282814	1.14199	0.382961	1.16569	0.523655	1.27866	0.682747
		0.23	0.95	0.32	0.75	0.48	0.5	0.74	0.2							0.17	0.238103	0.23104	0.227559	0.240195	0.228014	0.237954							0.295653	0.0156981	0.39922	0.0220511	0.522062	0.0324082	0.684424	0.0430621							0.295653	1.14536	0.39922	1.22218	0.522062	1.35937	0.684424
		0.24	1	0.33	0.95	0.49	0.55	0.75	0.3							0.18	0.245102	0.242429	0.257596	0.239	0.239448	0.248208							0.307719	0.016244	0.402514	0.0216568	0.529972	0.0288272	0.691107	0.0483073							0.307719	1.19133	0.402514	1.19145	0.529972	1.20133	0.691107
				0.34	1	0.5	0.55	0.76	0.3							0.19	0.25365	0.262826	0.266435	0.26297	0.260796	0.267299							0.316632	0.0158998	0.417801	0.023674	0.543793	0.0304077	0.694724	0.0479983							0.316632	1.13457	0.417801	1.24603	0.543793	1.25599	0.694724
				0.35	0.9	0.51	0.7	0.77	0.5							0.2	0.273317	0.272888	0.258034	0.275596	0.261377	0.261667							0.331496	0.0156559	0.416542	0.022735	0.551344	0.0302441	0.699954	0.0433856							0.331496	1.14198	0.416542	1.21741	0.551344	1.20163	0.699954
				0.36	0.9	0.52	0.95	0.78	0.45							0.21	0.28408	0.275738	0.279285	0.282532	0.281827	0.272746							0.348983	0.0157628	0.421448	0.0214271	0.555029	0.0326695	0.704978	0.0419029							0.348983	1.16171	0.421448	1.17423	0.555029	1.31082	0.704978
				0.37	1	0.53	0.65	0.79	0.4							0.22	0.282814	0.293991	0.291492	0.299377	0.298551	0.293991							0.356355	0.0159033	0.43901	0.0227214	0.56162	0.0304217	0.70786	0.0438403							0.356355	1.14076	0.43901	1.20441	0.56162	1.26946	0.70786
				0.38	1	0.54	1	0.8	0.5							0.23	0.295653	0.300751	0.307583	0.298	0.303082	0.30226							0.37159	0.0163907	0.441648	0.0233832	0.576011	0.0330182	0.716895	0.0405766							0.37159	1.14872	0.441648	1.22667	0.576011	1.3065	0.716895
				0.39	0.95	0.55	0.8	0.81	0.55							0.24	0.307719	0.306902	0.310161	0.319177	0.319578	0.308941							0.390667	0.0159858	0.474311	0.0224402	0.575094	0.0295676	0.718392	0.0393265							0.390667	1.14028	0.474311	1.18801	0.575094	1.23235	0.718392
				0.4	1	0.56	0.85	0.82	0.6							0.25	0.316632	0.319711	0.323839	0.327282	0.3332	0.328075							0.381627	0.0155244	0.467035	0.023083	0.586696	0.0303602	0.725651	0.0428421							0.381627	1.11618	0.467035	1.23299	0.586696	1.24558	0.725651
						0.57	0.9	0.83	0.55							0.26	0.331496	0.339455	0.32596	0.338547	0.327943	0.331627							0.399338	0.0157575	0.475239	0.0226802	0.586696	0.0296392	0.725489	0.0422594							0.399338	1.1082	0.475239	1.19477	0.586696	1.23679	0.725489
						0.58	0.85	0.84	0.8							0.27	0.348983	0.347448	0.338027	0.347448	0.351662	0.34269							0.400987	0.0157126	0.484633	0.0212187	0.598534	0.0292236	0.733823	0.0398861							0.400987	1.11866	0.484633	1.14082	0.598534	1.24088	0.733823
						0.59	0.95	0.85	0.6							0.28	0.356355	0.349494	0.352171	0.366884	0.352298	0.362017							0.420197	0.0155505	0.493461	0.0222673	0.608729	0.0302967	0.740327	0.0396242							0.420197	1.10674	0.493461	1.16588	0.608729	1.25648	0.740327
						0.6	0.85	0.86	0.8							0.29	0.37159	0.366635	0.364518	0.361641	0.359758	0.363519							0.427437	0.0157293	0.495546	0.0221291	0.612932	0.0294149	0.741243	0.042177							0.427437	1.11283	0.495546	1.16958	0.612932	1.23563	0.741243
						0.61	0.9	0.87	0.75							0.3	0.390667	0.38284	0.380655	0.377118	0.381506	0.38029							0.436361	0.0159353	0.509513	0.021447	0.616487	0.0290351	0.745176	0.0440156							0.436361	1.11898	0.509513	1.15838	0.616487	1.1994	0.745176
						0.62	1	0.88	0.65							0.31	0.381627	0.382961	0.379681	0.390188	0.375649	0.389948							0.433476	0.0156538	0.516588	0.0211142	0.621574	0.0296115	0.748457	0.0400199							0.433476	1.12458	0.516588	1.15312	0.621574	1.22432	0.748457
						0.63	0.95	0.89	0.95							0.32	0.399338	0.39922	0.400752	0.401927	0.393769	0.389709							0.448404	0.0154274	0.524402	0.0214674	0.628275	0.0300352	0.752814	0.0387514							0.448404	1.10684	0.524402	1.14664	0.628275	1.20169	0.752814
						0.64	0.95	0.9	0.9							0.33	0.400987	0.402514	0.404622	0.404388	0.400752	0.413441							0.452612	0.0155421	0.530249	0.0222449	0.635073	0.0305255	0.75638	0.041837							0.452612	1.11431	0.530249	1.17789	0.635073	1.21991	0.75638
						0.65	1	0.91	0.95							0.34	0.420197	0.417801	0.416198	0.423262	0.425071	0.417							0.464728	0.0156653	0.541818	0.021321	0.638993	0.0303002	0.759847	0.0393086							0.464728	1.10002	0.541818	1.13618	0.638993	1.22682	0.759847
						0.66	1	0.92	0.95							0.35	0.427437	0.416542	0.42665	0.419741	0.427999	0.431247							0.483113	0.015555	0.537661	0.0210598	0.651529	0.0292775	0.765025	0.0389639							0.483113	1.09137	0.537661	1.13904	0.651529	1.18912	0.765025
						0.67	0.95	0.93	0.95							0.36	0.436361	0.421448	0.441209	0.429009	0.438349	0.433253							0.488062	0.0153882	0.551168	0.0214542	0.655678	0.0285655	0.769548	0.039957							0.488062	1.10381	0.551168	1.15206	0.655678	1.18555	0.769548
						0.68	1	0.94	0.85							0.37	0.433476	0.43901	0.445798	0.437466	0.437466	0.444382							0.492566	0.015459	0.555727	0.0215582	0.653372	0.0290157	0.771216	0.0392995							0.492566	1.08224	0.555727	1.14094	0.653372	1.19394	0.771216
								0.95	0.95							0.38	0.448404	0.441648	0.44981	0.445145	0.45572	0.448187							0.501454	0.0157079	0.566669	0.0210152	0.66396	0.0292061	0.776105	0.0380588							0.501454	1.10269	0.566669	1.12666	0.66396	1.20355	0.776105
								0.96	0.95							0.39	0.452612	0.474311	0.461143	0.461566	0.457533	0.450566							0.507389	0.0155874	0.573925	0.0212933	0.668156	0.0289903	0.780242	0.0386447							0.507389	1.10419	0.573925	1.13258	0.668156	1.19146	0.780242
								0.97	0.95							0.4	0.464728	0.467035	0.465253	0.464413	0.468916	0.456361							0.511915	0.0153079	0.576011	0.0212773	0.674033	0.0285971	0.782218	0.0386541							0.511915	1.08637	0.576011	1.14117	0.674033	1.18191	0.782218
								0.98	0.95							0.41	0.483113	0.475239	0.474414	0.478013	0.473071	0.468916							0.517536	0.0155128	0.57908	0.02148	0.675566	0.0289286	0.785654	0.0389983							0.517536	1.08732	0.57908	1.14898	0.675566	1.18013	0.785654
								0.99	1							0.42	0.488062	0.484633	0.486754	0.482097	0.482097	0.484532							0.526266	0.0153643	0.592178	0.021094	0.686586	0.0283965	0.788331	0.0370874							0.526266	1.0863	0.592178	1.12322	0.686586	1.16676	0.788331
																0.43	0.492566	0.493461	0.485745	0.491069	0.491269	0.492167							0.541008	0.0154397	0.588559	0.0210887	0.688243	0.0292941	0.79212	0.0383699							0.541008	1.07688	0.588559	1.11735	0.688243	1.20512	0.79212
																0.44	0.501454	0.495546	0.497128	0.503798	0.502822	0.501747							0.545313	0.0156537	0.608806	0.0222987	0.691894	0.0290306									0.545313	1.08551	0.608806	1.13981	0.691894	1.1754
																0.45	0.507389	0.509513	0.507002	0.505936	0.502432	0.504868							0.55196	0.0154893	0.608191	0.0215188	0.696219	0.0290469									0.55196	1.08602	0.608191	1.13212	0.696219	1.18059
																0.46	0.511915	0.516588	0.510379	0.523842	0.516493	0.513828							0.567349	0.0152459	0.615809	0.0216292	0.705961	0.0284253									0.567349	1.0753	0.615809	1.13412	0.705961	1.17155
																0.47	0.517536	0.524402	0.523655	0.516683	0.519144	0.519522							0.559808	0.0150836	0.625859	0.0212157	0.705267	0.0291078									0.559808	1.07492	0.625859	1.12947	0.705267	1.1804
																0.48	0.526266	0.530249	0.522062	0.527474	0.532366	0.533833							0.565646	0.0152129	0.626006	0.0213789	0.714102	0.0282336									0.565646	1.08044	0.626006	1.13363	0.714102	1.1571
																0.49	0.541008	0.541818	0.529972	0.534838	0.538024	0.538206							0.577009	0.015579	0.630749	0.0212907	0.712977	0.0285952									0.577009	1.07982	0.630749	1.1264	0.712977	1.1667
																0.5	0.545313	0.537661	0.543793	0.542178	0.540918	0.539925							0.585396	0.0153298	0.637644	0.0212978	0.718669	0.0281374									0.585396	1.07494	0.637644	1.11734	0.718669	1.1591
																0.51	0.55196	0.551168	0.551344	0.550727	0.549136	0.550815							0.58872	0.0156716	0.647123	0.0208513	0.725866	0.0291968									0.58872	1.09092	0.647123	1.12074	0.725866	1.17401
																0.52	0.567349	0.555727	0.555029	0.556163	0.562222	0.551168							0.598298	0.0153463	0.650158	0.0213538	0.727904	0.0288168									0.598298	1.07459	0.650158	1.12151	0.727904	1.16617
																0.53	0.559808	0.566669	0.56162	0.558163	0.565902	0.567349							0.603625	0.0154006	0.656556	0.021254	0.731776	0.0289893									0.603625	1.07305	0.656556	1.12541	0.731776	1.17685
																0.54	0.565646	0.573925	0.576011	0.576011	0.565987	0.570649							0.613387	0.0152864	0.655272	0.0208758	0.738639	0.028575									0.613387	1.07167	0.655272	1.11129	0.738639	1.1477
																0.55	0.577009	0.576011	0.575094	0.576094	0.578997	0.579988							0.616336	0.0154058	0.669976	0.0210119	0.737714	0.0284723									0.616336	1.08046	0.669976	1.10547	0.737714	1.1662
																0.56	0.585396	0.57908	0.586696	0.580318	0.586534	0.586128							0.625271	0.0153357	0.669392	0.0215255	0.744073	0.0281982									0.625271	1.07195	0.669392	1.13203	0.744073	1.15222
																0.57	0.58872	0.592178	0.586696	0.58694	0.595845	0.589608							0.629223	0.0152096	0.676456	0.021012	0.750768	0.0279109									0.629223	1.06645	0.676456	1.11966	0.750768	1.15029
																0.58	0.598298	0.588559	0.598534	0.595766	0.599558	0.598928							0.632485	0.0155264	0.681311	0.021507	0.752183	0.0291954									0.632485	1.06952	0.681311	1.1274	0.752183	1.18127
																0.59	0.603625	0.608806	0.608729	0.599636	0.605876	0.598928							0.636075	0.015249	0.687753	0.0212757	0.757621	0.0291487									0.636075	1.06719	0.687753	1.10766	0.757621	1.1756
																0.6	0.613387	0.608191	0.612932	0.608806	0.609956	0.613159							0.637003	0.0155381	0.69056	0.0212504	0.761679	0.0289658									0.637003	1.0687	0.69056	1.10829	0.761679	1.16394
																0.61	0.616336	0.615809	0.616487	0.621425	0.615129	0.610568							0.64947	0.0155239	0.697113	0.0211064	0.76447	0.028032									0.64947	1.06886	0.697113	1.10621	0.76447	1.1547
																0.62	0.625271	0.625859	0.621574	0.615431	0.620606	0.626153							0.655746	0.0154087	0.701247	0.0210102	0.768505	0.0289137									0.655746	1.06936	0.701247	1.10148	0.768505	1.16716
																0.63	0.629223	0.626006	0.628275	0.623131	0.630096	0.625344							0.664422	0.0156416	0.707516	0.0209162	0.77	0.0286987									0.664422	1.07091	0.707516	1.10068	0.77	1.15157
																0.64	0.632485	0.630749	0.635073	0.635431	0.634428	0.634356							0.665999	0.0154554	0.714439	0.0209958	0.775224	0.0282375									0.665999	1.06269	0.714439	1.0974	0.775224	1.14721
																0.65	0.636075	0.637644	0.638993	0.638993	0.638922	0.64062							0.673392	0.015135	0.713146	0.0205923	0.777769	0.0278228									0.673392	1.05262	0.713146	1.08746	0.777769	1.14354
																0.66	0.637003	0.647123	0.651529	0.646568	0.640549	0.649402							0.673264	0.0153809	0.721143	0.0210695	0.781533	0.0280915									0.673264	1.06495	0.721143	1.0947	0.781533	1.14349
																0.67	0.64947	0.650158	0.655678	0.648644	0.649195	0.653916							0.680935	0.015566	0.723759	0.0207076	0.785486	0.0282783									0.680935	1.06363	0.723759	1.09185	0.785486	1.14318
																0.68	0.655746	0.656556	0.653372	0.655272	0.655881	0.658439							0.684052	0.0152712	0.728811	0.0209112	0.789078	0.0275968									0.684052	1.06191	0.728811	1.09976	0.789078	1.13203
																0.69	0.664422	0.655272	0.66396	0.659844	0.66131	0.654391							0.689709	0.0153071	0.734188	0.0210862	0.79212	0.0282103									0.689709	1.05649	0.734188	1.09864	0.79212	1.13932
																0.7	0.665999	0.669976	0.668156	0.661244	0.66672	0.664619							0.696279	0.0152339	0.740327	0.0210489											0.696279	1.05915	0.740327	1.10252
																0.71	0.673392	0.669392	0.674033	0.669262	0.669717	0.6723							0.699659	0.0152486	0.741446	0.0207905											0.699659	1.05842	0.741446	1.08877
																0.72	0.673264	0.676456	0.675566	0.677218	0.668937	0.675183							0.710885	0.0153677	0.74367	0.0208363											0.710885	1.06538	0.74367	1.09359
																0.73	0.680935	0.681311	0.686586	0.682747	0.681499	0.679302							0.712808	0.0152341	0.750229	0.0209914											0.712808	1.05049	0.750229	1.10021
																0.74	0.684052	0.687753	0.688243	0.684424	0.691167	0.68368							0.71354	0.0153262	0.752912	0.0207074											0.71354	1.0598	0.752912	1.0951
																0.75	0.689709	0.69056	0.691894	0.691107	0.690925	0.689769							0.719	0.0154091	0.754845	0.0209937											0.719	1.05999	0.754845	1.09152
																0.76	0.696279	0.697113	0.696219	0.694724	0.693944	0.698596							0.723053	0.0150944	0.76013	0.0211356											0.723053	1.05191	0.76013	1.09376
																0.77	0.699659	0.701247	0.705961	0.699954	0.703643	0.703701							0.727476	0.015202	0.764424	0.0211765											0.727476	1.04796	0.764424	1.09961
																0.78	0.710885	0.707516	0.705267	0.704978	0.706998	0.707803							0.733299	0.0153065	0.767183	0.0208876											0.733299	1.05621	0.767183	1.08815
																0.79	0.712808	0.714439	0.714102	0.70786	0.711905	0.712977							0.735594	0.0155533	0.771216	0.021004											0.735594	1.05577	0.771216	1.09055
																0.8	0.71354	0.713146	0.712977	0.716895	0.714999	0.714943							0.741192	0.0156177	0.777943	0.0207154											0.741192	1.06001	0.777943	1.08065
																0.81	0.719	0.721143	0.718669	0.718392	0.72054	0.72054							0.74357	0.0153837	0.778509	0.0209868											0.74357	1.05947	0.778509	1.08776
																0.82	0.723053	0.723759	0.725866	0.725651	0.72592	0.723216							0.747318	0.0154372	0.783157	0.0209168											0.747318	1.05345	0.783157	1.08866
																0.83	0.727476	0.728811	0.727904	0.725489	0.727637	0.730245							0.751988	0.0153242	0.784853	0.020836											0.751988	1.0547	0.784853	1.08568
																0.84	0.733299	0.734188	0.731776	0.733823	0.73246	0.734605							0.759989	0.0153433	0.788995	0.0209639											0.759989	1.05164	0.788995	1.08261
																0.85	0.735594	0.740327	0.738639	0.740327	0.736009	0.738742							0.759989	0.0154238	0.79212	0.0210148											0.759989	1.05492	0.79212	1.08753
																0.86	0.741192	0.741446	0.737714	0.741243	0.740531	0.74048							0.764378	0.0153763													0.764378	1.04963
																0.87	0.74357	0.74367	0.744073	0.745176	0.744223	0.74362							0.767777	0.0155216													0.767777	1.05775
																0.88	0.747318	0.750229	0.750768	0.748457	0.75018	0.747963							0.771665	0.015472													0.771665	1.05236
																0.89	0.751988	0.752912	0.752183	0.752814	0.754459	0.753105							0.77487	0.0154444													0.77487	1.05207
																0.9	0.759989	0.754845	0.757621	0.75638	0.756953	0.755997							0.779897	0.0154814													0.779897	1.04979
																0.91	0.759989	0.76013	0.761679	0.759847	0.760741	0.762427							0.78256	0.0154242													0.78256	1.0514
																0.92	0.764378	0.764424	0.76447	0.765025	0.762893	0.765117							0.785233	0.0155468													0.785233	1.05695
																0.93	0.767777	0.767183	0.768505	0.769548	0.768459	0.768369							0.788331	0.0153601													0.788331	1.05163
																0.94	0.771665	0.771216	0.77	0.771216	0.771799	0.772738							0.79212	0.0155032													0.79212	1.05055
																0.95	0.77487	0.777943	0.775224	0.776105	0.774738	0.776324
																0.96	0.779897	0.778509	0.777769	0.780242	0.780026	0.77877
																0.97	0.78256	0.783157	0.781533	0.782218	0.781704	0.781833
																0.98	0.785233	0.784853	0.785486	0.785654	0.785444	0.787248
																0.99	0.788331	0.788995	0.789078	0.788331	0.789078	0.78858
																1	0.79212	0.79212	0.79212	0.79212	0.79212	0.79212
[truncated: 40 more columns]
